# Supplementary material for: Chiral spiro phosphoric acid-catalysed enantioselective reaction of ketenes with N–H pyrroles
Source: Royal Society of Chemistry journal article supplement (doi:10.1039/d1cc05307h), 2021-01-01
Supplement: d1cc05307h1.pdf [file d1cc05307h1.pdf]

## Chiral spiro phosphoric acid-catalysed enantioselective reaction of ketenes with N–H pyrroles

Qian-Yi Wang,† Teng-Fei Liu,† Li-Feng Chu, Yun Yao, and Chong-Dao Lu\*

School of Chemical Science and Technology, Yunnan University, Kunming 650091, China

\*E-mail: clu@ynu.edu.cn

† These authors Contributed equally to this work.

### Table of Contents

|                                                                                  |     |
|----------------------------------------------------------------------------------|-----|
| General experimental information .....                                           | S2  |
| General procedure for the preparation of <b>4</b> .....                          | S3  |
| Chiral HPLC analysis for reactions in Table 1 .....                              | S4  |
| Analytical data for product <b>4</b> .....                                       | S12 |
| References.....                                                                  | S26 |
| Determination of the configuration of product <b>4</b> . .....                   | S27 |
| <sup>1</sup> H NMR and <sup>13</sup> C NMR spectra for all of new compounds..... | S31 |
| Chiral HPLC analysis for compounds <b>4a-z</b> , <b>4aa-ae</b> . .....           | S62 |

## General Experimental information

All reactions were performed under a positive pressure of argon atmosphere in flame-dried glassware with magnetic stirring using standard Schlenk techniques. All solvents were dried and distilled before use. Column chromatography was performed using 100–200 mesh silica gel. Visualization on TLC (thin layer chromatography) was achieved by the use of UV light (254 nm) and treatment with aqueous ceric ammonium molybdate staining followed by heating. Melting point (m.p.) were measured using a Buchi melting point apparatus M-560 and are uncorrected. High-resolution mass spectra (HRMS) were measured using electron spray ionization with a LTQ-Orbitrap mass analyzer (ESI-Orbitrap). Optical rotations were measured on an Autopol IV (Rudolph Research Analytical).

Proton and carbon magnetic resonance spectra ( $^1\text{H}$  NMR and  $^{13}\text{C}$  NMR) were recorded on a 400 MHz ( $^1\text{H}$  NMR at 400 MHz and  $^{13}\text{C}$  NMR at 100 MHz), 500 MHz ( $^1\text{H}$  NMR at 500 MHz and  $^{13}\text{C}$  NMR at 125 MHz) spectrometer with solvent resonance as the internal standard ( $^1\text{H}$  NMR,  $\text{CDCl}_3$  at 7.260 ppm;  $^{13}\text{C}$  NMR,  $\text{CDCl}_3$  at 77.16 ppm).  $^1\text{H}$  NMR data are reported as follows: chemical shifts, multiplicity (s = singlet, d = doublet, t = triplet, q = quadruplet, m = multiplet), coupling constant(s) in Hz, and integration. Enantiomeric excess was determined by HPLC with a UV-Visible detector using chiral stationary columns (0.46 cm x 25 cm) from Daicel.

All chiral phosphoric acid catalysts were purchased from Daicel Chiral Technologies (China) Co., LTD and used without further purification. Ketenes<sup>[1-8]</sup> and  $\alpha$ -diazoketones<sup>[9-13]</sup> were prepared according to the reported procedures.

## General procedure for the preparation of compound 4

### General procedure A:

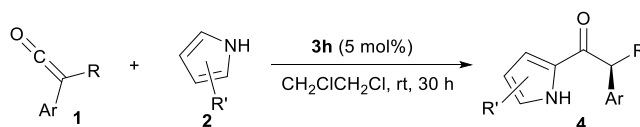

Under argon atmosphere, a flame-dried 10 mL Schlenk tube was charged with **3h** (0.005 mmol, 5 mol %) and DCE (1.5 mL). To the mixture, pyrrole **2** (0.5 mmol, 5.0 equiv) and ketene **1** (0.1 mmol, 1.0 equiv) in DCE (0.5 mL) were added successively. The resulting solution was stirred for 30 h at room temperature. The solution was evaporated under reduced pressure, and the residue was purified by silica gel chromatography (petroleum ether/ethyl acetate = 15:1) to give the product **4**.

### General procedure B:

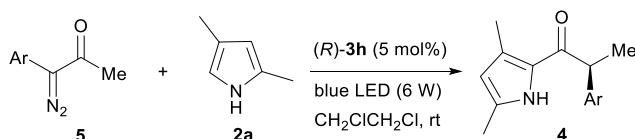

Under argon atmosphere, a flame-dried 10 mL Schlenk tube was charged with (*R*)-**3h** (0.005 mmol, 5 mol %), diazoketone compound **5** (0.1 mmol, 1.0 equiv), and DCE (2.0 mL). To the mixture, pyrrole **2a** (0.2 mmol, 2.0 equiv) was added. The resulting solution was stirred under the irradiation of 6W blue LEDs at room temperature. Upon completion, the solution was evaporated under reduced pressure, and the residue was purified by silica gel chromatography (petroleum ether/ethyl acetate = 15:1) to give the product **4**.

### Procedure for the preparation of racemic compound 4 using ketenes:

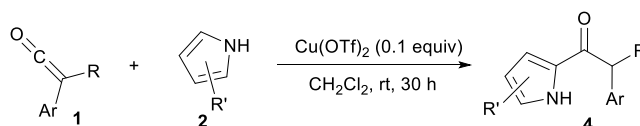

Under argon atmosphere, a flame-dried 10 mL Schlenk tube was charged with Cu(OTf)<sub>2</sub> (0.03 mmol, 0.1 equiv) and CH<sub>2</sub>Cl<sub>2</sub> (3.0 mL). To the mixture, pyrrole **2** (1.5 mmol, 5.0 equiv) and ketene **1** (0.3 mmol, 1.0 equiv) in CH<sub>2</sub>Cl<sub>2</sub> (1.0 mL) were added. The resulting solution was stirred for 30 h at room temperature. The solution was evaporated under reduced pressure, and the residue was purified by silica gel chromatography (petroleum ether/ethyl acetate = 15:1) to give the product **4**.

### Procedure for preparation of racemic compound 4 using alpha-diazoketones:

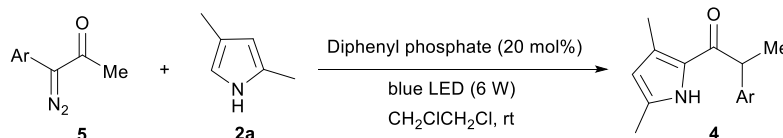

Under argon atmosphere, a flame-dried 10 mL Schlenk tube was charged with diphenyl phosphate (0.06 mmol, 20 mol %), diazo compound **5** (0.3 mmol, 1.0 equiv), and DCE (4.0 mL). To the mixture, pyrrole **2a** (0.6 mmol, 2.0 equiv) were added. The resulting solution was stirred under the irradiation of 12W blue LEDs at room temperature. Upon completion, the solution was evaporated under reduced pressure, and the residue was purified by silica gel chromatography (petroleum ether/ethyl acetate = 15:1) to give the product **4**.

## Chiral HPLC analysis for reactions in Table 1

Daicel Chiralcel OD-3 column, *n*-hexane/2-propanol = 97:3 (v/v), 1.0 mL/min, 254 nm, r.t

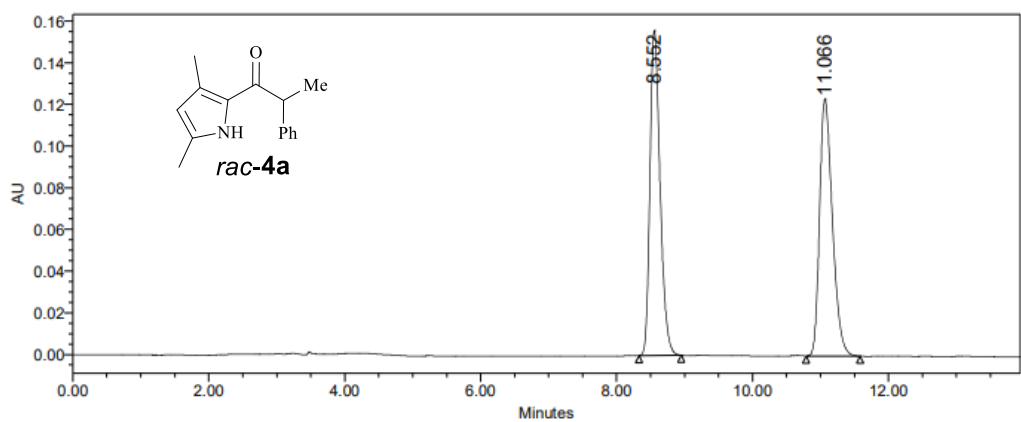

Channel: W2489 ChA; Processed Channel: W2489 ChA 243nm; Result Id: 2603; Processing Method: 9703 OD 3 254

### Processed Channel Descr.: W2489 ChA 243nm

|   | Processed Channel Descr. | RT     | Area    | % Area | Height |
|---|--------------------------|--------|---------|--------|--------|
| 1 | W2489 ChA 243nm          | 8.552  | 1613054 | 49.95  | 155778 |
| 2 | W2489 ChA 243nm          | 11.066 | 1616571 | 50.05  | 123367 |

### HPLC of *rac*-4a

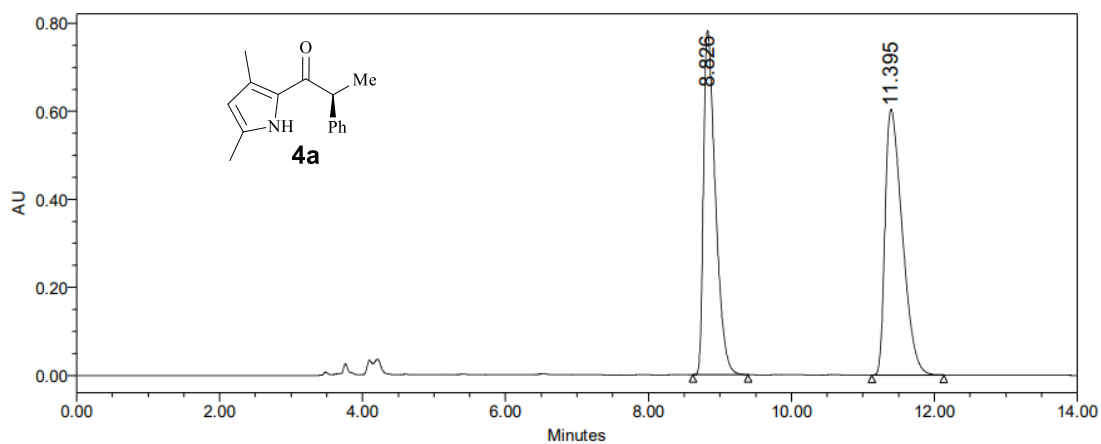

Channel: W2489 ChA; Processed Channel: W2489 ChA 254nm; Result Id: 4337; Processing Method: 9703 OD3 254

### Processed Channel Descr.: W2489 ChA 254nm

|   | Processed Channel Descr. | RT     | Area     | % Area | Height |
|---|--------------------------|--------|----------|--------|--------|
| 1 | W2489 ChA 254nm          | 8.826  | 9023454  | 47.18  | 781029 |
| 2 | W2489 ChA 254nm          | 11.395 | 10100602 | 52.82  | 603218 |

### Entry 1 (CPA (*R*)-3a/DCM)

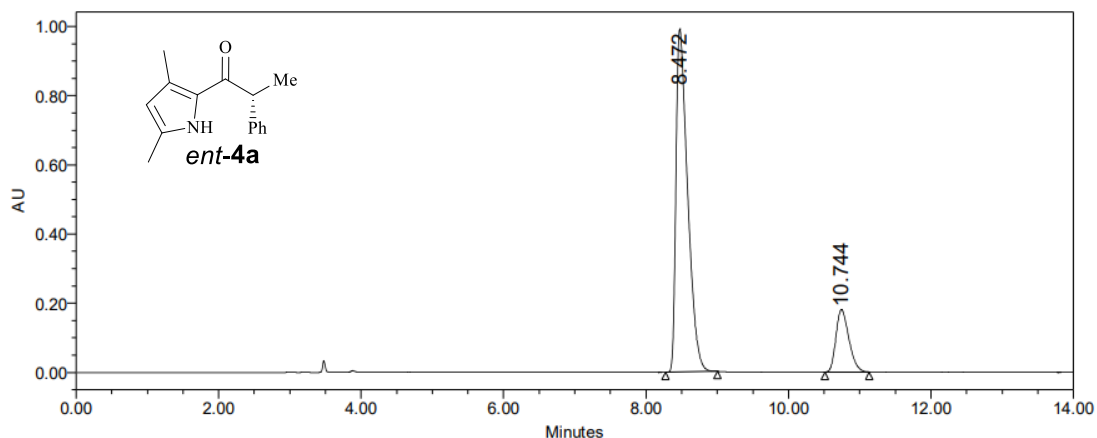

Channel: W2489 ChA; Processed Channel: W2489 ChA 254nm; Result Id: 3884; Processing Method: 9703 OD 3 254

**Processed Channel Descr.: W2489 ChA 254nm**

|   | Processed Channel Descr. | RT     | Area     | % Area | Height |
|---|--------------------------|--------|----------|--------|--------|
| 1 | W2489 ChA 254nm          | 8.472  | 11218209 | 83.08  | 991364 |
| 2 | W2489 ChA 254nm          | 10.744 | 2284349  | 16.92  | 180516 |

Entry 2 (CPA (*R*)-**3b**/DCM)

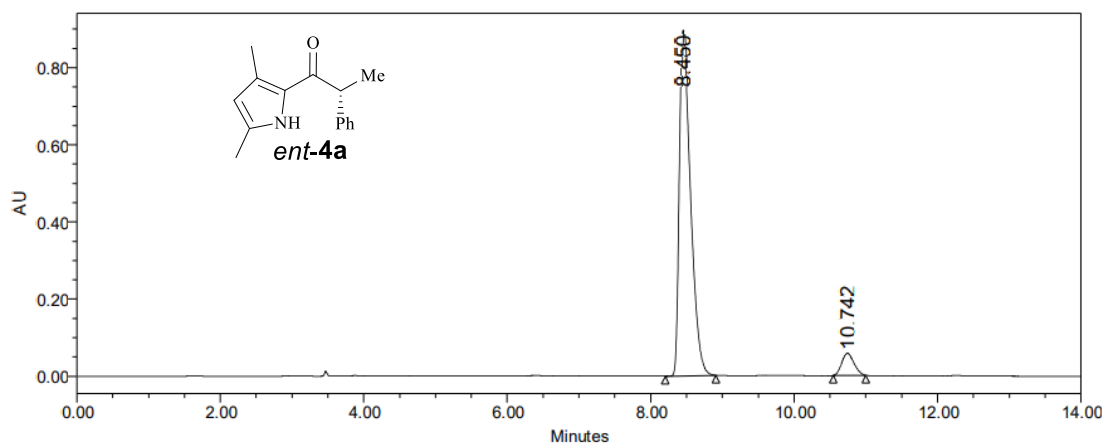

Channel: W2489 ChA; Processed Channel: W2489 ChA 254nm; Result Id: 3886; Processing Method: 9703 OD 3 254

**Processed Channel Descr.: W2489 ChA 254nm**

|   | Processed Channel Descr. | RT     | Area    | % Area | Height |
|---|--------------------------|--------|---------|--------|--------|
| 1 | W2489 ChA 254nm          | 8.450  | 9734849 | 93.48  | 895468 |
| 2 | W2489 ChA 254nm          | 10.742 | 678742  | 6.52   | 57413  |

Entry 3 (CPA (*R*)-**3c**/DCM)

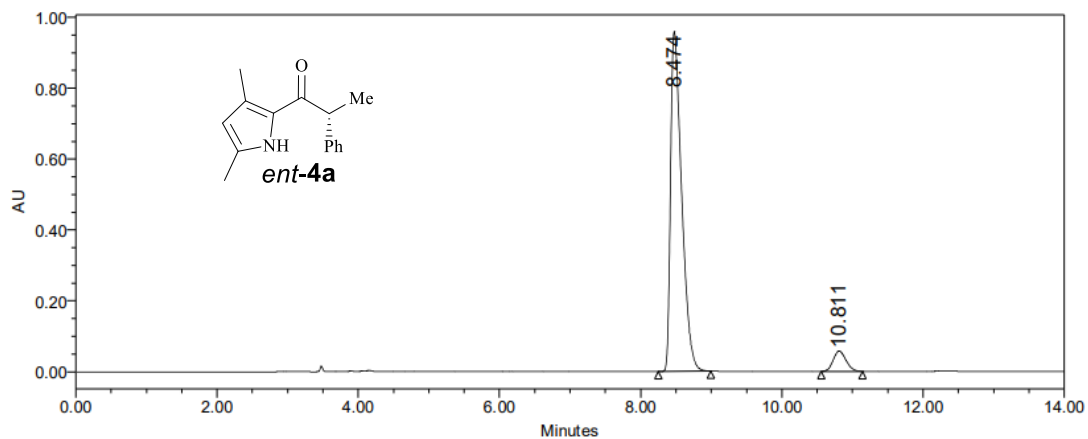

Channel: W2489 ChA; Processed Channel: W2489 ChA 254nm; Result Id: 3870; Processing Method: 9703 OD3 254

**Processed Channel Descr.: W2489 ChA 254nm**

|   | Processed Channel Descr. | RT     | Area     | % Area | Height |
|---|--------------------------|--------|----------|--------|--------|
| 1 | W2489 ChA 254nm          | 8.474  | 10422966 | 93.48  | 958063 |
| 2 | W2489 ChA 254nm          | 10.811 | 727413   | 6.52   | 57618  |

Entry 4 (CPA (*R*)-**3d**/DCM)

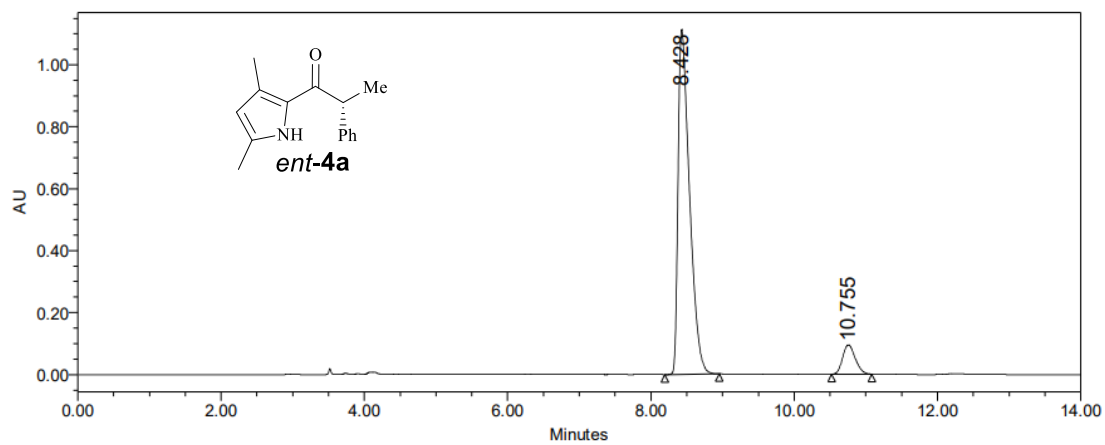

Channel: W2489 ChA; Processed Channel: W2489 ChA 254nm; Result Id: 3889; Processing Method: 9703 OD 3 254

**Processed Channel Descr.: W2489 ChA 254nm**

|   | Processed Channel Descr. | RT     | Area     | % Area | Height  |
|---|--------------------------|--------|----------|--------|---------|
| 1 | W2489 ChA 254nm          | 8.428  | 12321339 | 91.34  | 1112256 |
| 2 | W2489 ChA 254nm          | 10.755 | 1168056  | 8.66   | 95087   |

Entry 5 (CPA (*R*)-**3e**/DCM)

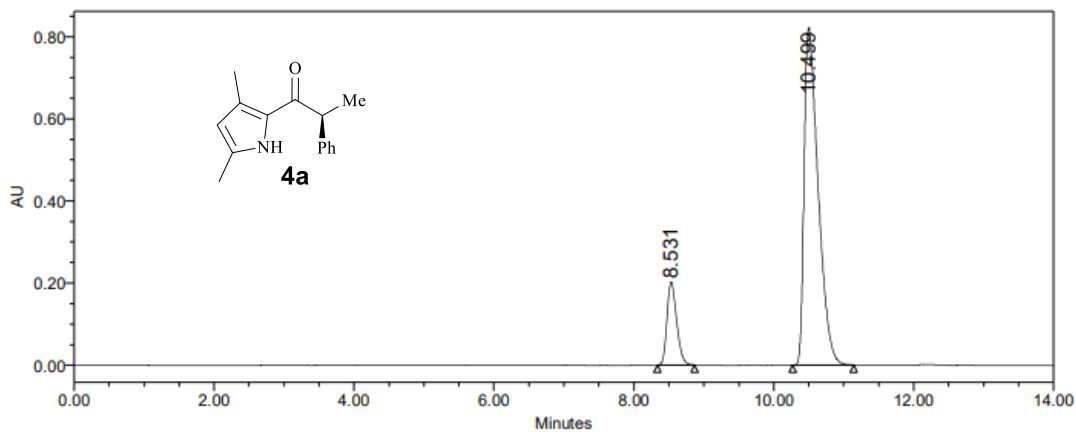

Channel: W2489 ChA; Processed Channel: W2489 ChA 254nm; Result Id: 4327; Processing Method: 9703 OD3 254

**Processed Channel Descr.: W2489 ChA 254nm**

|   | Processed Channel Descr. | RT     | Area     | % Area | Height |
|---|--------------------------|--------|----------|--------|--------|
| 1 | W2489 ChA 254nm          | 8.531  | 1949383  | 14.55  | 201710 |
| 2 | W2489 ChA 254nm          | 10.499 | 11446263 | 85.45  | 820600 |

Entry 6 (CPA (*R*)-3f/DCM)

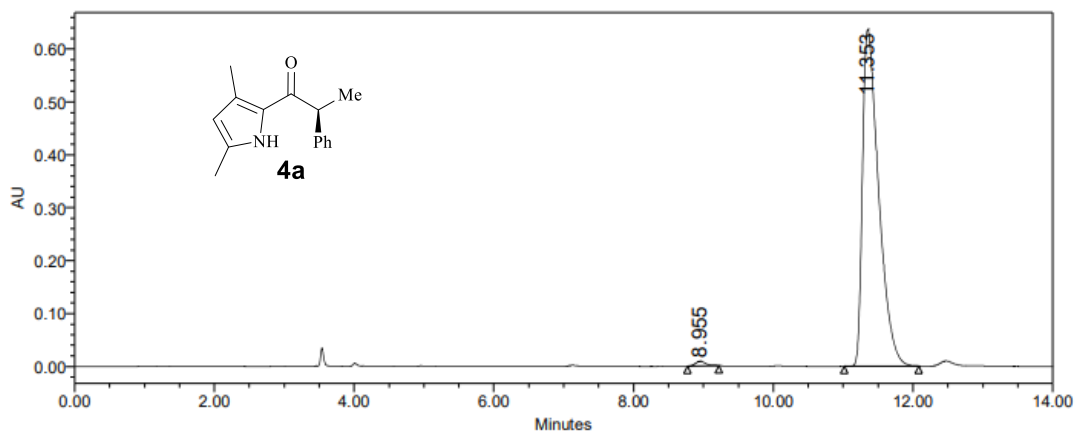

Channel: W2489 ChA; Processed Channel: W2489 ChA 254nm; Result Id: 4343; Processing Method: 9703 OD3 254

**Processed Channel Descr.: W2489 ChA 254nm**

|   | Processed Channel Descr. | RT     | Area     | % Area | Height |
|---|--------------------------|--------|----------|--------|--------|
| 1 | W2489 ChA 254nm          | 8.955  | 92788    | 0.90   | 8936   |
| 2 | W2489 ChA 254nm          | 11.353 | 10199965 | 99.10  | 636699 |

Entry 7 (CPA (*R*)-3g/DCM)

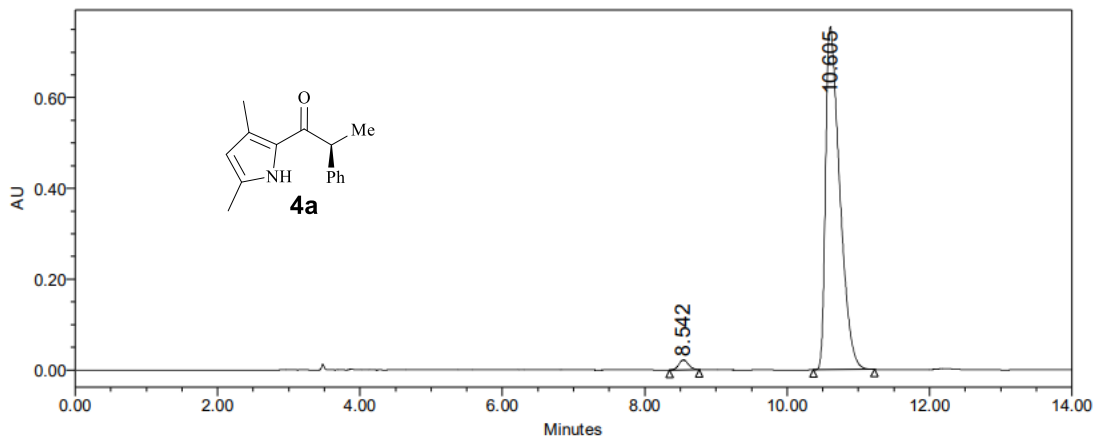

Channel: W2489 ChA; Processed Channel: W2489 ChA 254nm; Result Id: 3891; Processing Method: 9703 OD 3 254

**Processed Channel Descr.: W2489 ChA 254nm**

|   | Processed Channel Descr. | RT     | Area     | % Area | Height |
|---|--------------------------|--------|----------|--------|--------|
| 1 | W2489 ChA 254nm          | 8.542  | 203783   | 1.91   | 21677  |
| 2 | W2489 ChA 254nm          | 10.605 | 10447232 | 98.09  | 754897 |

Entry 8 (CPA (R)-3h/DCM)

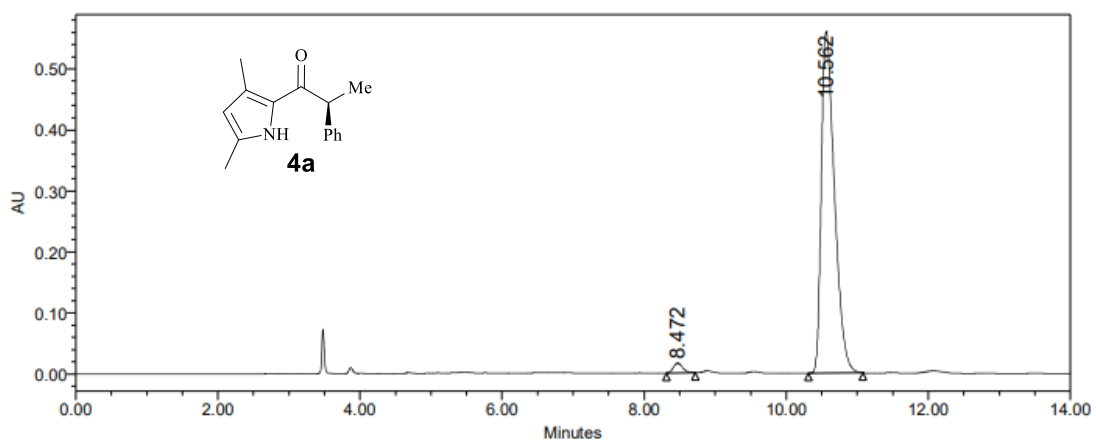

Channel: W2489 ChA; Processed Channel: W2489 ChA 254nm; Result Id: 4041; Processing Method: 9703 OD3 254

**Processed Channel Descr.: W2489 ChA 254nm**

|   | Processed Channel Descr. | RT     | Area    | % Area | Height |
|---|--------------------------|--------|---------|--------|--------|
| 1 | W2489 ChA 254nm          | 8.472  | 145296  | 1.97   | 16017  |
| 2 | W2489 ChA 254nm          | 10.562 | 7215970 | 98.03  | 559678 |

Entry 10 (CPA (R)-3h/THF)



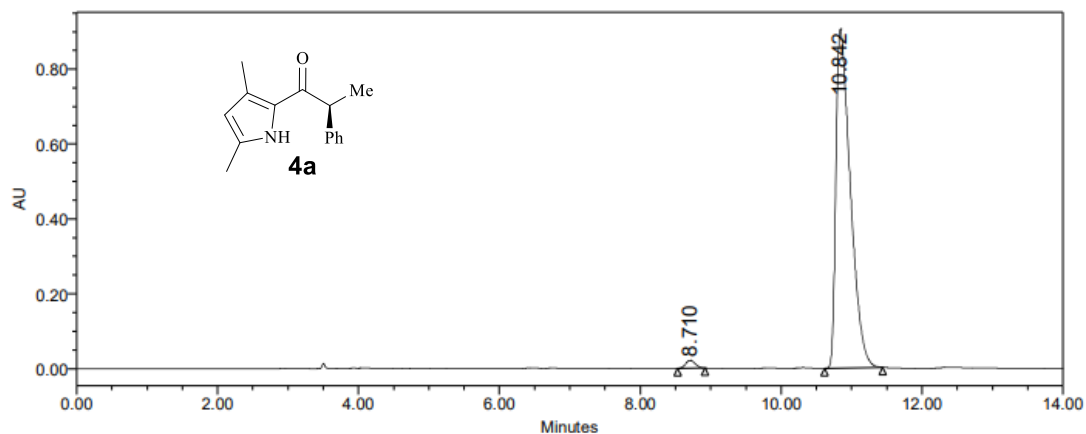

Channel: W2489 ChA; Processed Channel: W2489 ChA 254nm; Result Id: 4062; Processing Method: 9703 OD3 254

**Processed Channel Descr.: W2489 ChA 254nm**

|   | Processed Channel Descr. | RT     | Area     | % Area | Height |
|---|--------------------------|--------|----------|--------|--------|
| 1 | W2489 ChA 254nm          | 8.710  | 205091   | 1.57   | 21453  |
| 2 | W2489 ChA 254nm          | 10.842 | 12837516 | 98.43  | 904918 |

Entry 11 (CPA (*R*)-**3h**/Toluene)

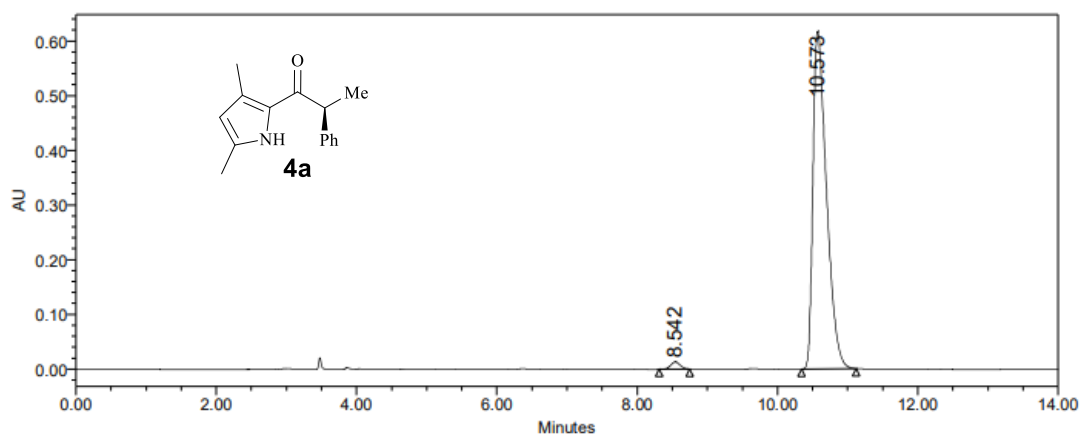

Channel: W2489 ChA; Processed Channel: W2489 ChA 254nm; Result Id: 4051; Processing Method: 9703 OD3 254

**Processed Channel Descr.: W2489 ChA 254nm**

|   | Processed Channel Descr. | RT     | Area    | % Area | Height |
|---|--------------------------|--------|---------|--------|--------|
| 1 | W2489 ChA 254nm          | 8.542  | 124520  | 1.48   | 13252  |
| 2 | W2489 ChA 254nm          | 10.573 | 8278899 | 98.52  | 617196 |

Entry 12 (CPA (*R*)-**3h**/Et<sub>2</sub>O)

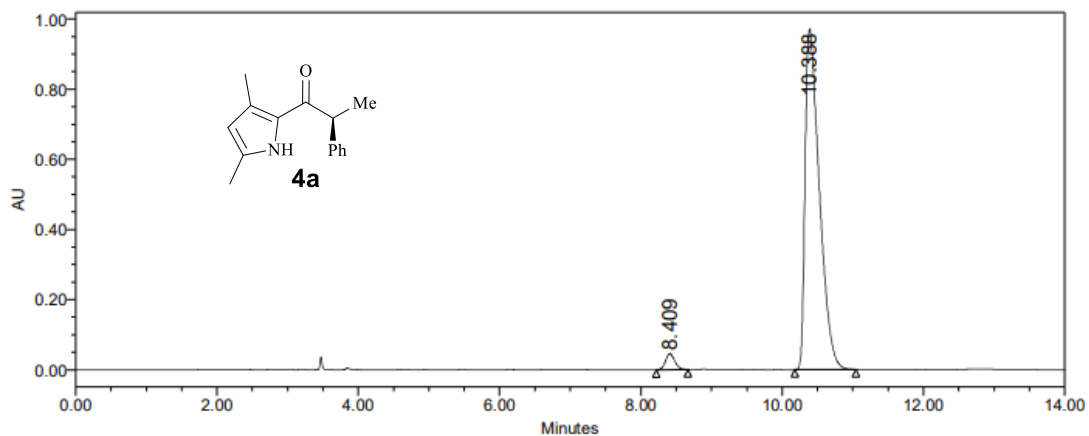

Channel: W2489 ChA; Processed Channel: W2489 ChA 254nm; Result Id: 4044; Processing Method: 9703 OD3 254

**Processed Channel Descr.: W2489 ChA 254nm**

|   | Processed Channel Descr. | RT     | Area     | % Area | Height |
|---|--------------------------|--------|----------|--------|--------|
| 1 | W2489 ChA 254nm          | 8.409  | 417788   | 2.98   | 45523  |
| 2 | W2489 ChA 254nm          | 10.388 | 13601288 | 97.02  | 969965 |

Entry 13 (CPA (*R*)-**3h**/CHCl<sub>3</sub>)

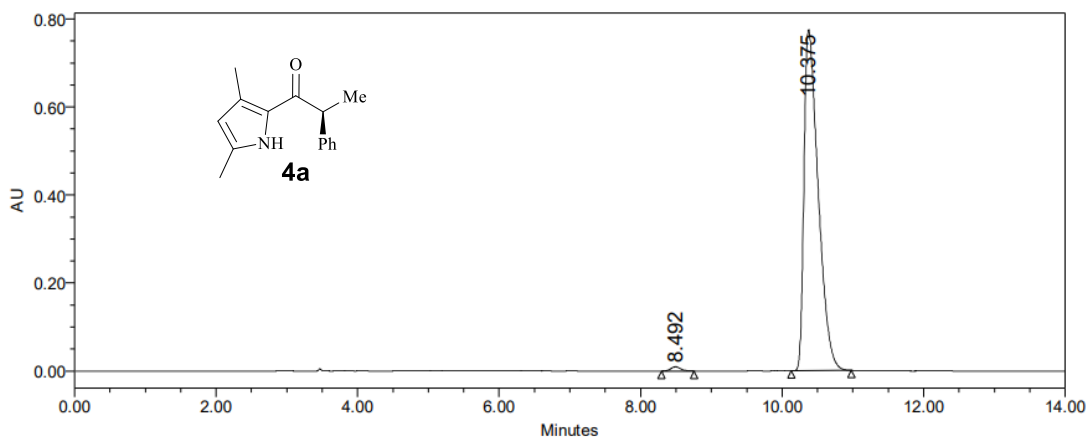

Channel: W2489 ChA; Processed Channel: W2489 ChA 254nm; Result Id: 4331; Processing Method: 9703 OD3 254

**Processed Channel Descr.: W2489 ChA 254nm**

|   | Processed Channel Descr. | RT     | Area     | % Area | Height |
|---|--------------------------|--------|----------|--------|--------|
| 1 | W2489 ChA 254nm          | 8.492  | 90053    | 0.83   | 9562   |
| 2 | W2489 ChA 254nm          | 10.375 | 10805130 | 99.17  | 774308 |

Entry 14 (CPA (*R*)-**3h**/DCE, rt)

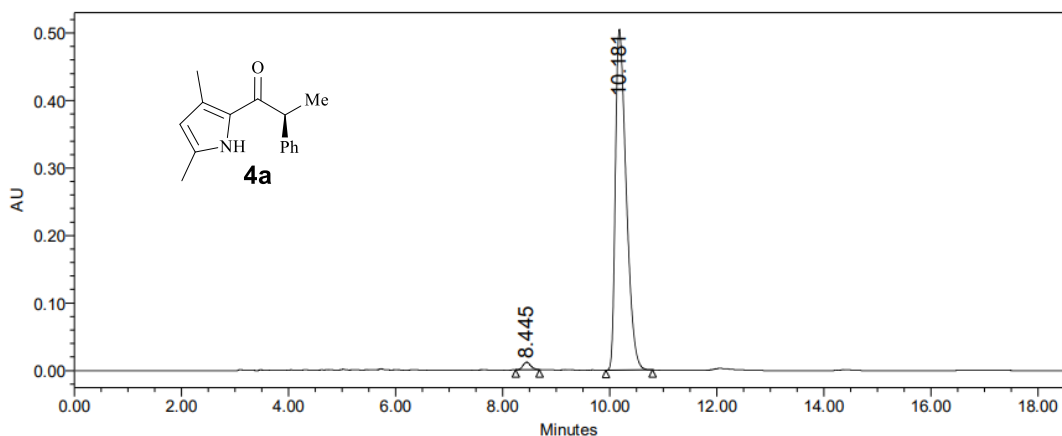

Channel: W2489 ChA; Processed Channel: W2489 ChA 254nm; Result Id: 5606; Processing Method: 9703 OD3 254

**Processed Channel Descr.: W2489 ChA 254nm**

|   | Processed Channel Descr. | RT     | Area    | % Area | Height |
|---|--------------------------|--------|---------|--------|--------|
| 1 | W2489 ChA 254nm          | 8.445  | 110003  | 1.53   | 11160  |
| 2 | W2489 ChA 254nm          | 10.181 | 7086266 | 98.47  | 504510 |

Entry 15 (CPA (*R*)-**3h**/DCE, rt, 1 mmol scale)

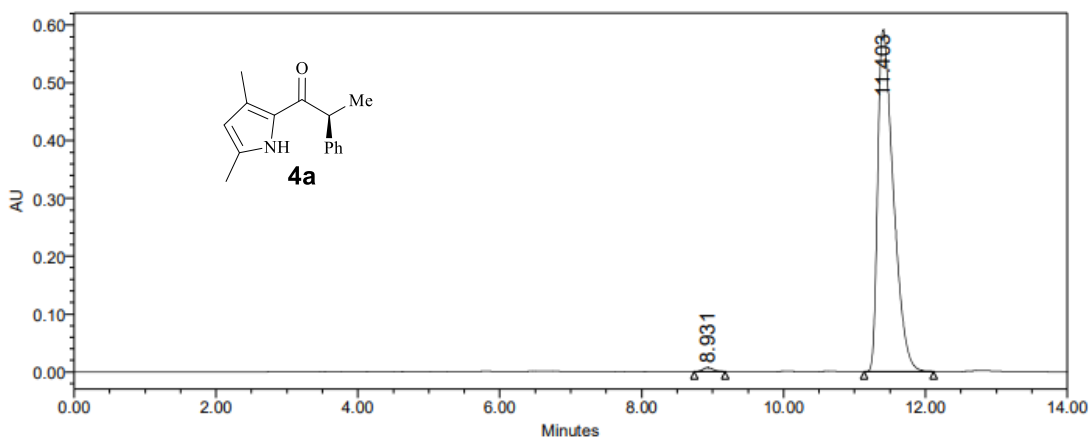

Channel: W2489 ChA; Processed Channel: W2489 ChA 254nm; Result Id: 4339; Processing Method: 9703 OD3 254

**Processed Channel Descr.: W2489 ChA 254nm**

|   | Processed Channel Descr. | RT     | Area    | % Area | Height |
|---|--------------------------|--------|---------|--------|--------|
| 1 | W2489 ChA 254nm          | 8.931  | 70752   | 0.78   | 6963   |
| 2 | W2489 ChA 254nm          | 11.403 | 9034716 | 99.22  | 590956 |

Entry 16 (CPA (*R*)-**3g**/DCE, rt)

## Reactions at low temperatures

Reactions of **1a** with **2a** using CPA **3h** as catalyst in dichloroethane at lower temperatures afforded the desired product **4a** in lower yields with comparable er, comparing to the reaction at room temperature (Table 1, entry 14). Reaction performed at 0 °C for 30 h afforded the product **4a** in 59% yield with ~99:1 er. Reaction performed at -30 °C for 30 h gave the product **4a** in 40% yield with ~99:1 er. The corresponding experiments and chiral HPLC analysis for these reactions were provided below.

**Reaction at 0 °C:** Under argon atmosphere, a flame-dried 10 mL Schlenk tube was charged with **3h** (3.5 mg, 0.005 mmol, 5 mol %) and DCE (1.5 mL). To the mixture, pyrrole **2a** (50.4 mg, 0.5 mmol, 5.0 equiv) and ketene **1a** (14 mg, 0.1 mmol, 1.0 equiv) in DCE (0.5 ml) were added successively. The resulting solution was stirred at 0 °C for 30 h. The reaction was quenched with sat. sol. NaHCO<sub>3</sub> and extracted with CH<sub>2</sub>Cl<sub>2</sub> (×3). The combined organic phase was washed with brine, dried over anhydrous Na<sub>2</sub>SO<sub>4</sub> and filtered. The resulting solution was evaporated under reduced pressure, and the residue was purified by silica gel chromatography (petroleum ether/ethyl acetate = 15:1) to give the product **4a** (14.1 mg, 59 % yield). See page S14 for analytical data of the compound **4a**. Chiral HPLC analysis indicated that the enantiomeric ratio of the product **4a** was ~99:1.

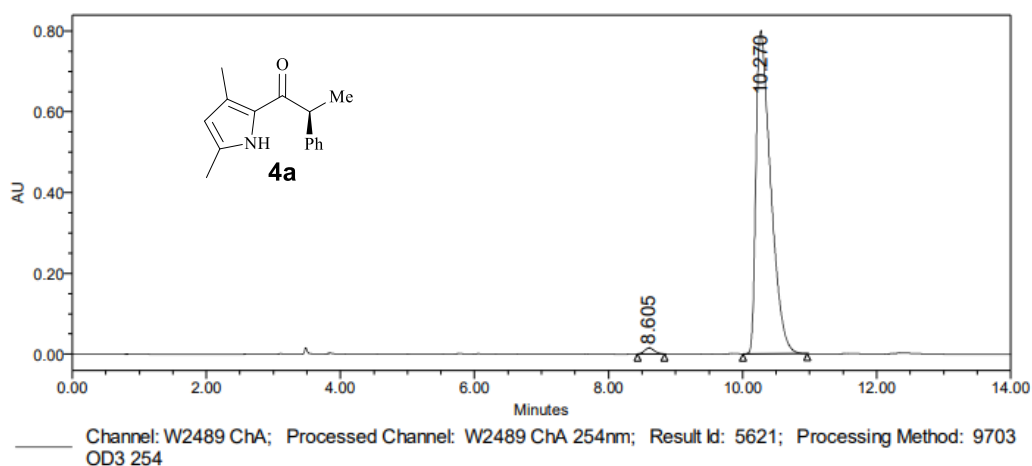

### Processed Channel Descr.: W2489 ChA 254nm

|   | Processed Channel Descr. | RT     | Area     | % Area | Height |
|---|--------------------------|--------|----------|--------|--------|
| 1 | W2489 ChA 254nm          | 8.605  | 152711   | 1.23   | 14965  |
| 2 | W2489 ChA 254nm          | 10.270 | 12249990 | 98.77  | 798712 |

CPA (*R*)-**3h**/DCE at 0 °C

**Reaction at -30 °C:** Under argon atmosphere, a flame-dried 10 mL Schlenk tube was charged with **3h** (3.5 mg, 0.005 mmol, 5 mol %) and DCE (1.5 mL). To the mixture, pyrrole **2a** (50.4 mg, 0.5 mmol, 5.0 equiv) and ketene **1a** (14 mg, 0.1 mmol, 1.0 equiv) in DCE (0.5 ml) were added successively. The resulting solution was stirred at -30 °C for 30 h. The reaction was quenched with sat. sol. NaHCO<sub>3</sub> and extracted with CH<sub>2</sub>Cl<sub>2</sub> (×3). The combined organic phase was washed with brine, dried over anhydrous Na<sub>2</sub>SO<sub>4</sub> and filtered. The resulting solution was evaporated under reduced pressure, and the residue was purified by silica gel chromatography (petroleum ether/ethyl acetate = 15:1) to give the product **4a** (9.7 mg, 40 % yield). See page S14 for analytical data of the compound **4a**. Chiral HPLC analysis indicated that the enantiomeric ratio of the product **4a** was ~99:1.

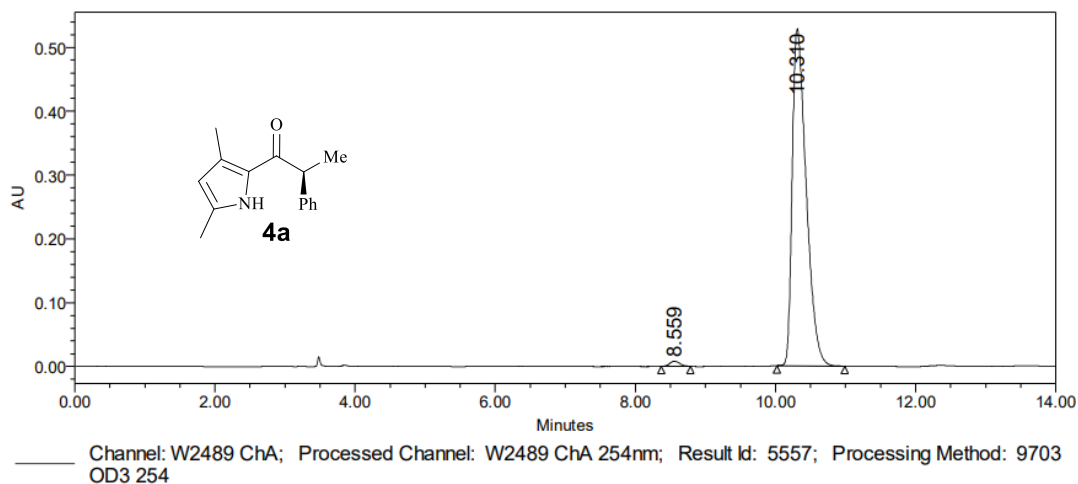

**Processed Channel Descr.: W2489 ChA 254nm**

|   | Processed Channel Descr. | RT     | Area    | % Area | Height |
|---|--------------------------|--------|---------|--------|--------|
| 1 | W2489 ChA 254nm          | 8.559  | 83628   | 1.13   | 8215   |
| 2 | W2489 ChA 254nm          | 10.310 | 7337367 | 98.87  | 527511 |

CPA (*R*)-**3h**/DCE at -30 °C

## Analytical data for product 4

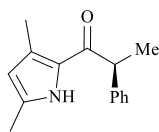

(**4a**) According to the general procedure A, reaction of **1a** (13.2 mg, 0.1 mmol, 1.0 equiv), 2, 4-dimethyl-1*H*-pyrrole **2a** (47.6 mg, 0.5 mmol, 5.0 equiv), (*R*)-**3h** (3.3 mg, 0.5% mmol, 0.05 equiv) afforded **4a** as a white solid (18.4 mg, 81%).

Analytical data for compound **4a**: mp 122–123 °C;  $R_f$  = 0.30 (petroleum ether/ethyl acetate = 10:1);  $[\alpha]^{25}_D = +114.0$  (c 0.37, CHCl<sub>3</sub>); enantiomeric ratio: 99:1, the er value of the product was determined by HPLC on a Daicel Chiralcel OD-3 column; eluent, *n*-hexane/2-propanol = 97:3 (v/v); temp, r.t.; flow rate, 1.0 mL/min; uv-vis detection,  $\lambda = 254$  nm;  $t_R$  (major) = 10.4 min;  $t_R$  (minor) = 8.5 min; <sup>1</sup>H NMR (400 MHz, CDCl<sub>3</sub>)  $\delta$  9.71 (s, 1H), 7.34–7.27 (m, 4H), 7.23–7.19 (m, 1H), 5.77 (d,  $J = 2.0$  Hz, 1H), 4.41 (q,  $J = 6.8$  Hz, 1H), 2.33 (s, 3H), 2.22 (s, 3H), 1.52 (d,  $J = 7.2$  Hz, 3H); <sup>13</sup>C NMR (100 MHz, CDCl<sub>3</sub>)  $\delta$  190.1, 141.8, 135.4, 128.7, 128.4, 128.2, 128.0, 126.7, 113.1, 47.3, 19.8, 14.8, 13.1; HRMS (ESI-Orbitrap) ( $m/z$ ) [M + H]<sup>+</sup> calcd for C<sub>15</sub>H<sub>18</sub>NO<sup>+</sup> 228.1383, found 228.1387.

### Scale-up reaction of **1a** (1 mmol) with **2a** in the presence of CPA catalyst (*R*)-**3h**:

Under argon atmosphere, a flame-dried 100 ml Schlenk flask was charged with (*R*)-**3h** (33.3 mg, 0.05 mmol, 5 mol %) and DCE (15.0 mL). To the mixture, pyrrole **2a** (475.1 mg, 5.0 mmol, 5.0 equiv) and ketene **1a** (132 mg, 1.0 mmol, 1.0 equiv) in DCE (5.0 mL) were added successively. The resulting solution was stirred for 30 h at room temperature. The solution was evaporated under reduced pressure, and the residue was purified by silica gel chromatography (petroleum ether/ethyl acetate = 15:1) to give the product **4a** (167 mg, 74% yield). Chiral HPLC analysis indicated that the enantiomeric ratio of the product was 98.5:1.5 (page S11).

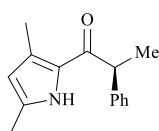

(**4a**) According to the general procedure B, reaction of **5a** (16.0 mg, 0.1 mmol, 1.0 equiv), 2, 4-dimethyl-1*H*-pyrrole **2a** (19.0 mg, 0.2 mmol, 2.0 equiv), and (*R*)-**3h** (3.3 mg, 0.5% mmol, 0.05 equiv) afforded **4a** as a white solid (14.6 mg, 64%).

Analytical data for compound **4a** prepared with general procedure B: enantiomeric ratio: 87.5:12.5, the er value of the product was determined by HPLC on a Daicel Chiralcel OD-3 column; eluent, *n*-hexane/2-propanol = 97:3 (v/v); temp, r.t.; flow rate, 1.0 mL/min; uv-vis detection,  $\lambda = 254$  nm;  $t_R$  (major) = 11.1 min;  $t_R$  (minor) = 9.1 min.

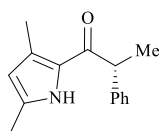

(*ent*-**4a**) According to the general procedure A, reaction of **1a** (13.2 mg, 0.1 mmol, 1.0 equiv), 2,4-dimethyl-1*H*-pyrrole **2a** (47.6 mg, 0.5 mmol, 5.0 equiv), (*S*)-**3h** (3.3 mg, 0.5% mmol, 0.05 equiv) afforded *ent*-**4a** as a white solid (16.6 mg, 73%). Analytical data for compound *ent*-**4a**: mp 123–124 °C;  $R_f = 0.30$  (petroleum ether/ethyl acetate = 10:1);  $[\alpha]_D^{25} = -109.3$  (c 0.14, CHCl<sub>3</sub>); enantiomeric ratio: 1.5:98.5, the er value of the product was determined by HPLC on a Daicel Chiralcel OD-3 column; eluent, *n*-hexane/2-propanol = 97:3 (v/v); temp, r.t.; flow rate, 1.0 mL/min; uv-vis detection,  $\lambda = 254$  nm;  $t_R$  (major) = 8.4 min;  $t_R$  (minor) = 11.4 min; HRMS (ESI-Orbitrap) ( $m/z$ )  $[M + H]^+$  calcd for C<sub>15</sub>H<sub>18</sub>NO<sup>+</sup> 228.1383, found 228.1385.

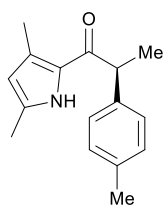

(**4b**) According to the general procedure A, reaction of **1b** (14.6 mg, 0.1 mmol, 1.0 equiv), 2,4-dimethyl-1*H*-pyrrole **2a** (47.6 mg, 0.5 mmol, 5.0 equiv), (*R*)-**3h** (3.3 mg, 0.5% mmol, 0.05 equiv) afforded **4b** as a white solid (16.4 mg, 68%). Analytical data for compound **4b**: mp 116–117 °C;  $R_f = 0.30$  (petroleum ether/ethyl acetate = 10:1);  $[\alpha]_D^{25} = +99.3$  (c 0.12, CHCl<sub>3</sub>); enantiomeric ratio: 97:3, the er value of the product was determined by HPLC on a Daicel Chiralcel OD-3 column; eluent, *n*-hexane/2-propanol = 97:3 (v/v); temp, r.t.; flow rate, 1.0 mL/min; uv-vis detection,  $\lambda = 254$  nm;  $t_R$  (major) = 11.5 min;  $t_R$  (minor) = 6.8 min; <sup>1</sup>H NMR (500 MHz, CDCl<sub>3</sub>)  $\delta$  9.71 (s, 1H), 7.22 (d,  $J = 7.5$  Hz, 2H), 7.11 (d,  $J = 7.5$  Hz, 2H), 5.77 (s, 1H), 4.37 (q,  $J = 6.5$  Hz, 1H), 2.33 (s, 3H), 2.31 (s, 3H), 2.23 (s, 3H), 1.51 (d,  $J = 7.0$  Hz, 3H); <sup>13</sup>C NMR (125 MHz, CDCl<sub>3</sub>)  $\delta$  190.3, 138.8, 136.3, 135.2, 129.4, 128.3, 128.2, 127.8, 113.0, 47.0, 21.1, 19.8, 14.7, 13.1; HRMS (ESI-Orbitrap) ( $m/z$ )  $[M + H]^+$  calcd for C<sub>16</sub>H<sub>20</sub>NO<sup>+</sup> 242.1539, found 242.1544.

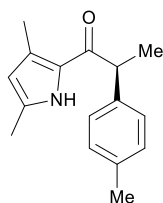

(**4b**) According to the general procedure B, reaction of **5b** (18.0 mg, 0.1 mmol, 1.0 equiv), 2,4-dimethyl-1*H*-pyrrole **2a** (19.7 mg, 0.2 mmol, 2.0 equiv), (*R*)-**3h** (3.4 mg, 0.5% mmol, 0.05 equiv) afforded **4b** as a white solid (15.0 mg, 60%). Analytical data for compound **4b** prepared with general procedure B: enantiomeric ratio: 92:8, the er value of the product was determined by HPLC on a Daicel Chiralcel OD-3 column; eluent, *n*-hexane/2-propanol = 97:3 (v/v); temp, r.t.; flow rate, 1.0 mL/min; uv-vis detection,  $\lambda = 254$  nm;  $t_R$  (major) = 12.2 min;  $t_R$  (minor) = 7.1 min.

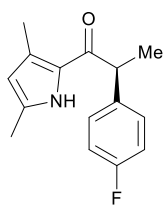

**(4c)** According to the general procedure A, reaction of **1c** (15.0 mg, 0.1 mmol, 1.0 equiv), 2,4-dimethyl-1*H*-pyrrole **2a** (47.6 mg, 0.5 mmol, 5.0 equiv), (*R*)-**3h** (3.3 mg, 0.5% mmol, 0.05 equiv) afforded **4c** as a white solid (16.2 mg, 66%).

Analytical data for compound **4c**: mp 146–147 °C;  $R_f = 0.30$  (petroleum ether/ethyl acetate = 10:1);  $[\alpha]^{25}_D = +85.9$  (c 0.09, CHCl<sub>3</sub>); enantiomeric ratio: 97.5:2.5, the er value of the product was determined by HPLC on a Daicel Chiralcel OD-3 column; eluent, *n*-hexane/2-propanol = 97:3 (v/v); temp, r.t.; flow rate, 1.0 mL/min; uv-vis detection,  $\lambda = 254$  nm;  $t_R$  (major) = 9.2 min;  $t_R$  (minor) = 7.8 min; <sup>19</sup>F NMR (471 MHz, CDCl<sub>3</sub>)  $\delta$  -116.4; <sup>1</sup>H NMR (500 MHz, CDCl<sub>3</sub>)  $\delta$  9.60 (s, 1H), 7.29–7.27 (m, 2H), 7.00–6.95 (m, 2H), 5.78 (d,  $J = 2.5$  Hz, 1H), 4.39 (q,  $J = 7.0$  Hz, 1H), 2.33 (s, 3H), 2.22 (s, 3H), 1.49 (d,  $J = 7.0$  Hz, 3H); <sup>13</sup>C NMR (125 MHz, CDCl<sub>3</sub>)  $\delta$  190.0, 161.9 (d,  $J = 243.3$  Hz), 137.5 (d,  $J = 3.1$  Hz), 135.5, 129.4 (d,  $J = 7.9$  Hz), 128.4, 128.0, 115.5 (d,  $J = 21.1$  Hz), 113.2, 46.5, 19.9, 14.7, 13.1; HRMS (ESI-Orbitrap) ( $m/z$ ) [ $M + H$ ]<sup>+</sup> calcd for C<sub>15</sub>H<sub>17</sub>FNO<sup>+</sup> 246.1289, found 246.1293.

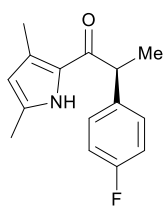

**(4c)** According to the general procedure B, reaction of **5c** (18.0 mg, 0.1 mmol, 1.0 equiv), 2,4-dimethyl-1*H*-pyrrole **2a** (19.2 mg, 0.2 mmol, 2.0 equiv), (*R*)-**3h** (3.4 mg, 0.5% mmol, 0.05 equiv) afforded **4c** as a white solid (19.1 mg, 77%).

Analytical data for compound **4c** prepared with general procedure B: enantiomeric ratio: 91:9, the er value of the product was determined by HPLC on a Daicel Chiralcel OD-3 column; eluent, *n*-hexane/2-propanol = 97:3 (v/v); temp, r.t.; flow rate, 1.0 mL/min; uv-vis detection,  $\lambda = 254$  nm;  $t_R$  (major) = 8.7 min;  $t_R$  (minor) = 7.5 min.

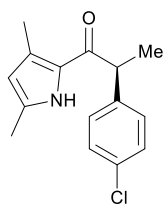

**(4d)** According to the general procedure A, reaction of **1d** (16.6 mg, 0.1 mmol, 1.0 equiv), 2,4-dimethyl-1*H*-pyrrole **2a** (47.6 mg, 0.5 mmol, 5.0 equiv), (*R*)-**3h** (3.3 mg, 0.5% mmol, 0.05 equiv) afforded **4d** as a white solid (18.9 mg, 72%).

Analytical data for compound **4d**: mp 125–126 °C;  $R_f = 0.30$  (petroleum ether/ethyl acetate = 10:1);  $[\alpha]^{25}_D = +75.7$  (c 0.10, CHCl<sub>3</sub>); enantiomeric ratio: 97:3, the er value of the product was determined by HPLC on a Daicel Chiralcel OD-3 column; eluent, *n*-hexane/2-propanol = 97:3 (v/v); temp, r.t.; flow rate, 1.0 mL/min; uv-vis detection,  $\lambda = 254$  nm;  $t_R$  (major) = 9.7 min;  $t_R$  (minor) = 7.8 min; <sup>1</sup>H NMR (500 MHz, CDCl<sub>3</sub>)  $\delta$  9.39 (s, 1H), 7.25–7.23 (m, 5H), 5.78 (d,



$J = 2.5$  Hz, 1H), 4.36 (q,  $J = 7.0$  Hz, 1H), 2.31 (s, 3H), 2.22 (s, 3H), 1.49 (d,  $J = 7.0$  Hz, 3H);  $^{13}\text{C}$  NMR (125 MHz,  $\text{CDCl}_3$ )  $\delta$  189.6, 140.2, 135.4, 135.7, 129.3, 128.9, 128.4, 128.0, 113.3, 46.7, 19.8, 14.74, 13.2; HRMS (ESI-Orbitrap) ( $m/z$ )  $[\text{M} + \text{Na}]^+$  calcd for  $\text{C}_{15}\text{H}_{16}\text{ClNNaO}^+$  284.0813, found 284.0815.

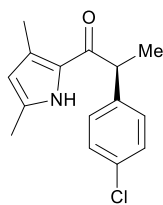

(**4d**) According to the general procedure B, reaction of **5d** (20.0 mg, 0.1 mmol, 1.0 equiv), 2,4-dimethyl-1*H*-pyrrole **2a** (19.6 mg, 0.2 mmol, 2.0 equiv), (*R*)-**3h** (3.4 mg, 0.5% mmol, 0.05 equiv) afforded **4d** as a white solid (18.6 mg, 69%).

Analytical data for compound **4d** prepared with general procedure B: enantiomeric ratio: 96:4, the er value of the product was determined by HPLC on a Daicel Chiralcel OD-3 column; eluent, *n*-hexane/2-propanol = 97:3 (v/v); temp, r.t.; flow rate, 1.0 mL/min; uv-vis detection,  $\lambda = 254$  nm;  $t_{\text{R}}$  (major) = 9.6 min;  $t_{\text{R}}$  (minor) = 8.0 min.

#### Scale-up reaction of **5d** (1.0 mmol) with **2a** in the presence of CPA catalyst (*R*)-**3h**:

Under argon atmosphere, a flame-dried 100 ml Schlenk flask was charged with (*R*)-**3h** (33.3 mg, 0.05 mmol, 5 mol %), diazoketone **5d** (195.0 mg, 1.0 mmol, 1.0 equiv), and DCE (20.0 mL). To the mixture, pyrrole **2a** (190.7 mg, 2.0 mmol, 2.0 equiv) was added. The resulting solution was stirred under the irradiation of 6W blue LEDs at room temperature. Upon completion, the solution was evaporated under reduced pressure, and the residue was purified by silica gel chromatography (petroleum ether/ethyl acetate = 15:1) to give the product **4d** (190.4 mg, 73% yield). Chiral HPLC analysis indicated the enantiomeric ratio of the product was 95.5:4.5 (page S77).

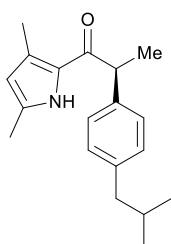

(**4e**) According to the general procedure A, reaction of **1e** (18.8 mg, 0.1 mmol, 1.0 equiv), 2,4-dimethyl-1*H*-pyrrole **2a** (47.6 mg, 0.5 mmol, 5.0 equiv), (*R*)-**3h** (3.3 mg, 0.5% mmol, 0.05 equiv) afforded **4e** as a white solid (20.7 mg, 73%).

Analytical data for compound **4e**: mp 96–97 °C;  $R_f = 0.30$  (petroleum ether/ethyl acetate = 10:1);  $[\alpha]_{\text{D}}^{25} = +78.7$  (c 0.19,  $\text{CHCl}_3$ ); enantiomeric ratio: 95.5:4.5, the er value of the product was determined by HPLC on a Daicel Chiralcel OD-3 column; eluent, *n*-hexane/2-propanol = 97:3 (v/v); temp, r.t.; flow rate, 1.0 mL/min; uv-vis detection,  $\lambda = 254$  nm;  $t_{\text{R}}$  (major) = 6.8 min;  $t_{\text{R}}$  (minor) = 5.4 min;  $^1\text{H}$  NMR (500 MHz,  $\text{CDCl}_3$ )  $\delta$  9.52 (s, 1H), 7.22–7.20 (m, 2H), 7.07–7.06 (m, 2H), 5.76 (d,  $J = 2.5$  Hz, 1H), 4.36 (q,  $J = 7.0$  Hz, 1H), 2.42 (d,  $J = 7.0$  Hz, 2H), 2.32

(s, 3H), 2.21 (s, 3H), 1.86–1.78 (m, 1H), 1.50 (d,  $J = 7.0$  Hz, 3H), 0.89 (d,  $J = 2.5$  Hz, 3H), 0.87 (d,  $J = 2.5$  Hz, 3H);  $^{13}\text{C}$  NMR (125 MHz,  $\text{CDCl}_3$ )  $\delta$  190.4, 140.1, 139.0, 135.0, 129.5, 128.4, 128.2, 127.6, 113.0, 47.0, 45.2, 30.3, 22.6, 22.5, 19.8, 14.7, 13.1; HRMS (ESI-Orbitrap) ( $m/z$ )  $[\text{M} + \text{H}]^+$  calcd for  $\text{C}_{19}\text{H}_{26}\text{NO}^+$  284.2009, found 284.2012.

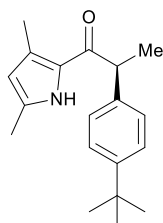

**(4f)** According to the general procedure A, reaction of **1f** (18.8 mg, 0.1 mmol, 1.0 equiv), 2,4-dimethyl-1*H*-pyrrole **2a** (47.6 mg, 0.5 mmol, 5.0 equiv), (*R*)-**3h** (3.3 mg, 0.5% mmol, 0.05 equiv) afforded **4f** as a white solid (21.8 mg, 77%).

Analytical data for compound **4f**: mp 152–153 °C;  $R_f = 0.30$  (petroleum ether/ethyl acetate = 10:1);  $[\alpha]_D^{25} = +75.3$  (c 0.21,  $\text{CHCl}_3$ ); enantiomeric ratio: 98.5:1.5, the er value of the product was determined by HPLC on a Daicel Chiralcel OD-3 column; eluent, *n*-hexane/2-propanol = 97:3 (v/v); temp, r.t.; flow rate, 1.0 mL/min; uv-vis detection,  $\lambda = 254$  nm;  $t_R$  (major) = 8.6 min;  $t_R$  (minor) = 5.5 min;  $^1\text{H}$  NMR (500 MHz,  $\text{CDCl}_3$ )  $\delta$  9.67 (s, 1H), 7.32–7.30 (m, 2H), 7.26–7.24 (s, 2H), 5.77 (d,  $J = 3.0$  Hz, 1H), 4.39 (q,  $J = 6.5$  Hz, 1H), 2.35 (s, 3H), 2.21 (s, 3H), 1.51 (d,  $J = 7.0$  Hz, 3H), 1.29 (s, 9H);  $^{13}\text{C}$  NMR (125 MHz,  $\text{CDCl}_3$ )  $\delta$  190.4, 149.5, 138.6, 135.2, 128.4, 128.2, 127.6, 125.6, 113.0, 46.8, 34.5, 31.5, 19.7, 14.8, 13.1; HRMS (ESI-Orbitrap) ( $m/z$ )  $[\text{M} + \text{H}]^+$  calcd for  $\text{C}_{19}\text{H}_{26}\text{NO}^+$  284.2009, found 284.2013.

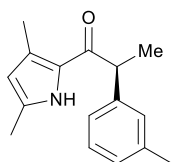

**(4g)** According to the general procedure A, reaction of **1g** (14.6 mg, 0.1 mmol, 1.0 equiv), 2,4-dimethyl-1*H*-pyrrole **2a** (47.6 mg, 0.5 mmol, 5.0 equiv), (*R*)-**3h** (3.3 mg, 0.5% mmol, 0.05 equiv) afforded **4g** as a white solid (15.4 mg, 64%).

Analytical data for compound **4g**: mp 100–101 °C;  $R_f = 0.30$  (petroleum ether/ethyl acetate = 10:1);  $[\alpha]_D^{25} = +130.4$  (c 0.11,  $\text{CHCl}_3$ ); enantiomeric ratio: 97:3, the er value of the product was determined by HPLC on a Daicel Chiralcel OD-3 column; eluent, *n*-hexane/2-propanol = 97:3 (v/v); temp, r.t.; flow rate, 1.0 mL/min; uv-vis detection,  $\lambda = 254$  nm;  $t_R$  (major) = 10.6 min;  $t_R$  (minor) = 7.2 min;  $^1\text{H}$  NMR (500 MHz,  $\text{CDCl}_3$ )  $\delta$  9.60 (s, 1H), 7.18 (t,  $J = 7.5$  Hz, 1H), 7.13–7.11 (m, 2H), 7.02 (d,  $J = 7.5$  Hz, 1H), 5.77 (d,  $J = 3.0$  Hz, 1H), 4.37 (q,  $J = 7.0$  Hz, 1H), 2.34 (s, 3H), 2.32 (s, 3H), 2.22 (s, 3H), 1.51 (d,  $J = 7.0$  Hz, 3H);  $^{13}\text{C}$  NMR (125 MHz,  $\text{CDCl}_3$ )  $\delta$  190.2, 141.7, 138.3, 135.2, 128.6, 128.5, 128.4, 128.2, 127.6, 125.1, 113.0, 47.3, 21.6, 19.8, 14.8, 13.1; HRMS (ESI-Orbitrap) ( $m/z$ )  $[\text{M} + \text{H}]^+$  calcd for  $\text{C}_{16}\text{H}_{20}\text{NO}^+$  242.1539, found 242.1544.

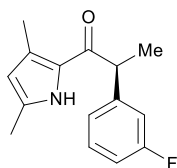

(**4h**) According to the general procedure A, reaction of **1h** (15.0 mg, 0.1 mmol, 1.0 equiv), 2,4-dimethyl-1*H*-pyrrole **2a** (47.6 mg, 0.5 mmol, 5.0 equiv), (*R*)-**3h** (3.3 mg, 0.5% mmol, 0.05 equiv) afforded **4h** as a white solid (19.6 mg, 80%).

Analytical data for compound **4h**: mp 102–103 °C;  $R_f = 0.30$  (petroleum ether/ethyl acetate = 10:1);  $[\alpha]_D^{25} = +104.4$  (c 0.11, CHCl<sub>3</sub>); enantiomeric ratio: 98:2, the er value of the product was determined by HPLC on a Daicel Chiralcel OD-3 column; eluent, *n*-hexane/2-propanol = 97:3 (v/v); temp, r.t.; flow rate, 1.0 mL/min; uv-vis detection,  $\lambda = 254$  nm;  $t_R$  (major) = 9.9 min;  $t_R$  (minor) = 7.8 min; <sup>19</sup>F NMR (471 MHz, CDCl<sub>3</sub>)  $\delta$  -112.9; <sup>1</sup>H NMR (500 MHz, CDCl<sub>3</sub>)  $\delta$  9.88 (s, 1H), 7.30–7.27 (m, 1H), 7.14–7.09 (m, 2H), 6.96–6.92 (m, 1H), 5.83 (s, 1H), 4.46 (q,  $J = 7.0$  Hz, 1H), 2.38 (s, 3H), 2.27 (s, 3H), 1.56 (d,  $J = 7.0$  Hz, 3H); <sup>13</sup>C NMR (125 MHz, CDCl<sub>3</sub>)  $\delta$  189.4, 163.1 ( $J = 244.1$  Hz), 144.3 (d,  $J = 7.1$  Hz), 144.28, 135.9, 130.0 (d,  $J = 8.3$  Hz), 128.7, 128.1, 123.7 (d,  $J = 2.6$  Hz), 115.0 (d,  $J = 21.6$  Hz), 113.7 (d,  $J = 20.9$  Hz), 113.3, 46.9, 19.7, 14.8, 13.1; HRMS (ESI-Orbitrap) ( $m/z$ ) [ $M + H$ ]<sup>+</sup> calcd for C<sub>15</sub>H<sub>17</sub>FNO<sup>+</sup> 246.1289, found 246.1293.

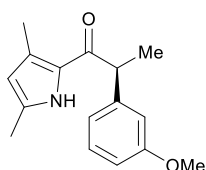

(**4i**) According to the general procedure A, reaction of **1i** (16.2 mg, 0.1 mmol, 1.0 equiv), 2,4-dimethyl-1*H*-pyrrole **2a** (47.6 mg, 0.5 mmol, 5.0 equiv), (*R*)-**3h** (3.3 mg, 0.5% mmol, 0.05 equiv) afforded **4i** as a colorless oil (16.4 mg, 64%). Analytical data for compound **4i**;  $R_f = 0.20$  (petroleum ether/ethyl

acetate = 10:1);  $[\alpha]_D^{25} = +92.1$  (c 0.11, CHCl<sub>3</sub>); enantiomeric ratio: 97.5:2.5, the er value of the product was determined by HPLC on a Daicel Chiralcel OD-3 column; eluent, *n*-hexane/2-propanol = 95:5 (v/v); temp, r.t.; flow rate, 1.0 mL/min; uv-vis detection,  $\lambda = 254$  nm;  $t_R$  (major) = 19.4 min;  $t_R$  (minor) = 8.4 min; <sup>1</sup>H NMR (500 MHz, CDCl<sub>3</sub>)  $\delta$  9.43 (s, 1H), 7.22–7.19 (m, 1H), 6.91–6.89 (m, 1H), 6.88–6.87 (m, 1H), 6.76–6.74 (m, 1H), 5.76 (d,  $J = 3.0$  Hz, 1H), 4.36 (q,  $J = 7.0$  Hz, 1H), 3.77 (s, 3H), 2.33 (s, 3H), 2.22 (s, 3H), 1.50 (d,  $J = 7.0$  Hz, 3H); <sup>13</sup>C NMR (125 MHz, CDCl<sub>3</sub>)  $\delta$  189.9, 159.9, 143.3, 135.1, 129.7, 128.5, 128.2, 120.4, 113.8, 113.1, 112.0, 55.30, 47.4, 19.7, 14.7, 13.1; HRMS (ESI-Orbitrap) ( $m/z$ ) [ $M + H$ ]<sup>+</sup> calcd for C<sub>16</sub>H<sub>20</sub>NO<sub>2</sub><sup>+</sup> 258.1489, found 258.1492.

(**4j**) According to the general procedure A, reaction of **1j** (14.6 mg, 0.1 mmol, 1.0 equiv), 2,4-dimethyl-1*H*-pyrrole **2a** (47.6 mg, 0.5 mmol, 5.0 equiv), (*R*)-**3h** (3.3 mg, 0.5% mmol, 0.05 equiv)

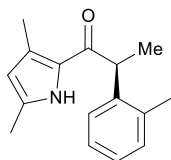

afforded **4j** as a white solid (22.4 mg, 93%). Analytical data for compound **4j**: mp 171–172 °C;  $R_f$  = 0.30 (petroleum ether/ethyl acetate = 10:1);  $[\alpha]^{25}_D = +193.4$  (c 0.33,  $\text{CHCl}_3$ ); enantiomeric ratio: 98.5:1.5, the er value of the product was determined by HPLC on a Daicel Chiralcel OD-3 column; eluent, *n*-hexane/2-propanol = 97:3 (v/v); temp, r.t.; flow rate, 1.0 mL/min; uv-vis detection,  $\lambda = 254$  nm;  $t_R$  (major) = 18.3 min;  $t_R$  (minor) = 12.5 min;  $^1\text{H NMR}$  (500 MHz,  $\text{CDCl}_3$ )  $\delta$  9.99 (s, 1H), 7.24–7.21 (m, 1H), 7.19–7.16 (m, 1H), 7.15–7.12 (m, 2H), 5.76 (d,  $J = 2.5$  Hz, 1H), 4.50 (q,  $J = 7.0$  Hz, 1H), 2.40 (s, 3H), 2.21 (s, 3H), 2.20 (s, 3H), 1.51 (d,  $J = 7.0$  Hz, 3H);  $^{13}\text{C NMR}$  (125 MHz,  $\text{CDCl}_3$ )  $\delta$  190.5, 140.1, 135.6, 135.3, 130.5, 128.3, 128.2, 127.2, 126.7, 126.6, 112.8, 44.5, 19.5, 17.8, 14.0, 13.0; HRMS (ESI-Orbitrap) ( $m/z$ )  $[\text{M} + \text{H}]^+$  calcd for  $\text{C}_{16}\text{H}_{20}\text{NO}^+$  242.1539, found 242.1542.

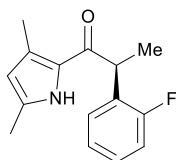

(**4k**) According to the general procedure A, reaction of **1k** (15.0 mg, 0.1 mmol, 1.0 equiv), 2,4-dimethyl-1*H*-pyrrole **2a** (47.6 mg, 0.5 mmol, 5.0 equiv), (*R*)-**3h** (3.3 mg, 0.5% mmol, 0.05 equiv) afforded **4k** as a white solid (19.8 mg, 81%). Analytical data for compound **4k**: mp 132–133 °C;  $R_f = 0.30$  (petroleum ether/ethyl acetate = 10:1);  $[\alpha]^{25}_D = +95.1$  (c 0.11,  $\text{CHCl}_3$ ); enantiomeric ratio: 96:4, the er value of the product was determined by HPLC on a Daicel Chiralcel OD-3 column; eluent, *n*-hexane/2-propanol = 97:3 (v/v); temp, r.t.; flow rate, 1.0 mL/min; uv-vis detection,  $\lambda = 254$  nm;  $t_R$  (major) = 15.8 min;  $t_R$  (minor) = 10.1 min;  $^{19}\text{F NMR}$  (471 MHz,  $\text{CDCl}_3$ )  $\delta$  -118.9;  $^1\text{H NMR}$  (500 MHz,  $\text{CDCl}_3$ )  $\delta$  9.77 (s, 1H), 7.34–7.30 (m, 1H), 7.19–7.15 (m, 1H), 7.04–6.99 (m, 2H), 5.77 (d,  $J = 3.0$  Hz, 1H), 4.72 (q,  $J = 7.0$  Hz, 1H), 2.27 (s, 3H), 2.22 (s, 3H), 1.50 (d,  $J = 7.0$  Hz, 3H);  $^{13}\text{C NMR}$  (125 MHz,  $\text{CDCl}_3$ )  $\delta$  189.3, 160.3 (d,  $J = 243.0$  Hz), 135.7, 129.5, 129.0 (d,  $J = 4.0$  Hz), 128.7 (d,  $J = 15.0$  Hz), 128.3 (d,  $J = 8.4$  Hz), 127.9, 124.6 (d,  $J = 3.4$  Hz), 115.2 (d,  $J = 22.5$  Hz), 113.2, 39.7, 18.2, 14.1, 13.1; HRMS (ESI-Orbitrap) ( $m/z$ )  $[\text{M} + \text{H}]^+$  calcd for  $\text{C}_{15}\text{H}_{17}\text{FNO}^+$  246.1289, found 246.1295.

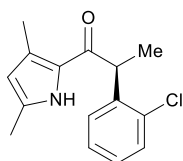

(**4l**) According to the general procedure A, reaction of **1l** (16.6 mg, 0.1 mmol, 1.0 equiv), 2,4-dimethyl-1*H*-pyrrole **2a** (47.6 mg, 0.5 mmol, 5.0 equiv), (*R*)-**3h** (3.3 mg, 0.5% mmol, 0.05 equiv) afforded **4l** as a white solid (23.5 mg, 90%) Analytical data for compound **4l**: mp 153–153 °C;  $R_f = 0.30$  (petroleum ether/ethyl acetate = 10:1);  $[\alpha]^{25}_D = +103.5$  (c 0.28,  $\text{CHCl}_3$ ); enantiomeric ratio: 97.5:2.5, the er value of the product was

determined by HPLC on a Daicel Chiralcel OD-3 column; eluent, *n*-hexane/2-propanol = 97:3 (v/v); temp, r.t.; flow rate, 1.0 mL/min; uv-vis detection,  $\lambda = 254$  nm;  $t_R$  (major) = 21.5 min;  $t_R$  (minor) = 16.9 min;  $^1\text{H}$  NMR (500 MHz,  $\text{CDCl}_3$ )  $\delta$  9.69 (s, 1H), 7.38–7.36 (m, 1H), 7.32–7.30 (m, 1H), 7.20–7.14 (m, 2H), 5.76 (d,  $J = 3.0$  Hz, 1H), 4.77 (q,  $J = 7.0$  Hz, 1H), 2.24 (s, 3H), 2.20 (s, 3H), 1.50 (d,  $J = 7.0$  Hz, 3H);  $^{13}\text{C}$  NMR (125 MHz,  $\text{CDCl}_3$ )  $\delta$  189.3, 139.5, 135.4, 133.8, 129.5, 129.2, 128.9, 128.1, 128.0, 127.4, 113.1, 44.4, 17.6, 14.0, 13.1; HRMS (ESI-Orbitrap) ( $m/z$ )  $[\text{M} + \text{H}]^+$  calcd for  $\text{C}_{15}\text{H}_{17}\text{ClNO}^+$  262.0993, found 262.0997.

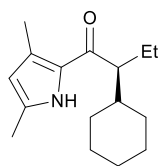

**(4m)** According to the general procedure A, reaction of **1m** (15.2 mg, 0.1 mmol, 1.0 equiv), 2,4-dimethyl-1*H*-pyrrole (47.6 mg, 0.5 mmol, 5.0 equiv), (*R*)-**3h** (3.3 mg, 0.5 % mmol, 0.05 equiv) afforded **4m** as a white solid (17.6 mg, 71%).

Analytical data for compound **4m**: mp 106–107 °C;  $R_f = 0.30$  (petroleum ether/ethyl acetate = 10:1);  $[\alpha]_D^{25} = +49.7$  (c 0.11,  $\text{CHCl}_3$ ); enantiomeric ratio: 74.5:25.5, the er value of the product was determined by HPLC on a Daicel Chiralcel OD-3 column; eluent, *n*-hexane/2-propanol = 97:3 (v/v); temp, r.t.; flow rate, 1.0 mL/min; uv-vis detection,  $\lambda = 254$  nm;  $t_R$  (major) = 6.1 min;  $t_R$  (minor) = 5.2 min;  $^1\text{H}$  NMR (500 MHz,  $\text{CDCl}_3$ )  $\delta$  9.88 (s, 1H), 5.81 (s, 1H), 3.04–2.92 (m, 1H), 2.37 (s, 3H), 2.27 (s, 3H), 1.96–1.47 (m, 7H), 1.34–0.79 (m, 9H);  $^{13}\text{C}$  NMR (125 MHz,  $\text{CDCl}_3$ )  $\delta$  194.2, 134.7, 128.7, 127.7, 113.0, 46.7, 40.8, 32.3, 29.5, 26.7, 26.6, 26.5, 14.7, 14.0, 13.0; HRMS (ESI-Orbitrap) ( $m/z$ )  $[\text{M} + \text{H}]^+$  calcd for  $\text{C}_{15}\text{H}_{24}\text{NO}^+$  234.1852, found 234.1853.

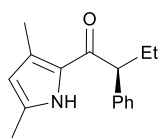

**(4n)** According to the general procedure A, reaction of **1n** (14.6 mg, 0.1 mmol, 1.0 equiv), 2,4-dimethyl-1*H*-pyrrole (47.6 mg, 0.5 mmol, 5.0 equiv), (*R*)-**3h** (3.3 mg, 0.5 % mmol, 0.05 equiv) afforded **4n** as a white solid (19.8 mg, 82%).

Analytical data for compound **4n**: mp 113–114 °C;  $R_f = 0.30$  (petroleum ether/ethyl acetate = 10:1);  $[\alpha]_D^{25} = +93.4$  (c 0.14,  $\text{CHCl}_3$ ); enantiomeric ratio: 94:6, the er value of the product was determined by HPLC on a Daicel Chiralcel OD-3 column; eluent, *n*-hexane/2-propanol = 97:3 (v/v); temp, r.t.; flow rate, 1.0 mL/min; uv-vis detection,  $\lambda = 254$  nm;  $t_R$  (major) = 8.9 min;  $t_R$  (minor) = 6.7 min;  $^1\text{H}$  NMR (400 MHz,  $\text{CDCl}_3$ )  $\delta$  9.75 (s, 1H), 7.38–7.33 (m, 2H), 7.32–7.27 (m, 2H), 7.24–7.18 (m, 1H), 5.78 (d,  $J = 2.8$  Hz, 1H), 4.19 (t,  $J = 7.2$  Hz, 1H), 2.40 (s, 3H), 2.23 (s, 3H), 2.19 (q,  $J = 7.2$  Hz, 1H), 1.84 (q,  $J = 7.2$  Hz, 1H), 0.94 (t,  $J = 7.4$  Hz, 3H);  $^{13}\text{C}$  NMR (100 MHz,  $\text{CDCl}_3$ )  $\delta$  189.7, 140.2,

135.3, 128.8, 128.6, 128.4, 128.4, 126.8, 113.2, 55.1, 27.9, 15.0, 13.1, 12.7; HRMS (ESI-Orbitrap) ( $m/z$ ) [ $M + H$ ]<sup>+</sup> calcd for C<sub>16</sub>H<sub>20</sub>NO<sup>+</sup> 242.1539, found 242.1542.

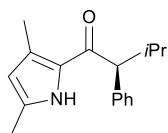

(**4o**) According to the general procedure A, reaction of **1o** (16.0 mg, 0.1 mmol, 1.0 equiv), 2,4-dimethyl-1*H*-pyrrole (47.6 mg, 0.5 mmol, 5.0 equiv), (*R*)-**3h** (3.3 mg, 0.5 % mmol, 0.05 equiv) afforded **4o** as a yellow solid (14.6 mg, 57%).

Analytical data for compound **4o**: mp 87–88 °C;  $R_f$  = 0.30 (petroleum ether/ethyl acetate = 10:1);  $[\alpha]_D^{25} = +3.3$  (c 0.56, CHCl<sub>3</sub>); enantiomeric ratio: 53.5:46.5, the er value of the product was determined by HPLC on a Daicel Chiralcel OD-3 column; eluent, *n*-hexane/2-propanol = 97:3 (v/v); temp, r.t.; flow rate, 1.0 mL/min; uv-vis detection,  $\lambda = 254$  nm;  $t_R$  (major) = 8.2 min;  $t_R$  (minor) = 5.6 min; <sup>1</sup>H NMR (500 MHz, CDCl<sub>3</sub>)  $\delta$  9.30 (s, 1H), 7.40–7.36 (m, 2H), 7.29–7.26 (m, 2H), 7.22–7.17 (m, 1H), 5.78 (d,  $J = 2.5$  Hz, 1H), 3.90 (d,  $J = 10.5$  Hz, 1H), 2.57–2.49 (m, 1H), 2.47 (s, 3H), 2.22 (s, 3H), 1.02 (d,  $J = 6.5$  Hz, 3H), 0.75 (d,  $J = 6.5$  Hz, 3H); <sup>13</sup>C NMR (125 MHz, CDCl<sub>3</sub>)  $\delta$  190.2, 139.3, 134.8, 129.2, 128.9, 128.5, 128.2, 126.9, 113.3, 61.2, 32.5, 22.0, 21.0, 15.3, 13.1; HRMS (ESI-Orbitrap) ( $m/z$ ) [ $M + H$ ]<sup>+</sup> calcd for C<sub>17</sub>H<sub>22</sub>NO<sup>+</sup> 256.1696, found 256.1696.

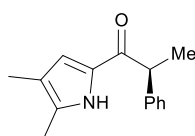

(**4p**) According to the general procedure A, reaction of **1a** (13.2 mg, 0.1 mmol, 1.0 equiv), 2,3-dimethyl-1*H*-pyrrole<sup>[14]</sup> (47.6 mg, 0.5 mmol, 5.0 equiv), (*R*)-**3h** (3.3 mg, 0.5 % mmol, 0.05 equiv) afforded **4p** as a white solid (16.1 mg, 71%).

Analytical data for compound **4p**: mp 157–158 °C;  $R_f$  = 0.30 (petroleum ether/ethyl acetate = 10:1);  $[\alpha]_D^{25} = +60.3$  (c 0.11, CHCl<sub>3</sub>); enantiomeric ratio: 96:4, the er value of the product was determined by HPLC on a Daicel Chiralcel OD-3 column; eluent, *n*-hexane/2-propanol = 97:3 (v/v); temp, r.t.; flow rate, 1.0 mL/min; uv-vis detection,  $\lambda = 254$  nm;  $t_R$  (major) = 13.7 min;  $t_R$  (minor) = 8.1 min; <sup>1</sup>H NMR (500 MHz, CDCl<sub>3</sub>)  $\delta$  10.18 (s, 1H), 7.41–7.34 (m, 2H), 7.33–7.27 (m, 2H), 7.23–7.17 (m, 1H), 6.75 (d,  $J = 2.3$  Hz, 1H), 4.40 (q,  $J = 7.0$  Hz, 1H), 2.19 (s, 3H), 2.00 (s, 3H), 1.54 (d,  $J = 7.0$  Hz, 3H); <sup>13</sup>C NMR (125 MHz, CDCl<sub>3</sub>)  $\delta$  189.7, 142.4, 134.8, 128.7, 128.6, 127.8, 126.7, 119.0, 118.1, 46.8, 19.0, 11.4, 11.0; HRMS (ESI-Orbitrap) ( $m/z$ ) [ $M + H$ ]<sup>+</sup> calcd for C<sub>15</sub>H<sub>18</sub>NO<sup>+</sup> 228.1383, found 228.1385.

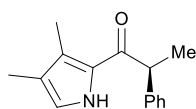

**(4q)** According to the general procedure A, reaction of **1a** (13.2 mg, 0.1 mmol, 1.0 equiv), 3,4-dimethyl-1*H*-pyrrole<sup>[15]</sup> (47.6 mg, 0.5 mmol, 5.0 equiv), (*R*)-**3h** (3.3 mg, 0.5 % mmol, 0.05 equiv) afforded **4q** as a white solid (14.5 mg, 71%). Analytical data for compound **4q**: mp 130–131 °C;  $R_f = 0.30$  (petroleum ether/ethyl acetate = 10:1);  $[\alpha]^{25}_D = +77.5$  (c 0.12, CHCl<sub>3</sub>); enantiomeric ratio: 95.5:4.5, the er value of the product was determined by HPLC on a Daicel Chiralcel OD-3 column; eluent, *n*-hexane/2-propanol = 99:1 (v/v); temp, r.t.; flow rate, 1.0 mL/min; uv-vis detection,  $\lambda = 254$  nm;  $t_R$  (major) = 19.4 min;  $t_R$  (minor) = 20.9 min; <sup>1</sup>H NMR (500 MHz, CDCl<sub>3</sub>)  $\delta$  9.10 (s, 1H), 7.36–7.27 (m, 4H), 7.25–7.18 (m, 1H), 6.70 (d,  $J = 3.0$  Hz, 1H), 4.41 (q,  $J = 7.0$  Hz, 1H), 2.27 (s, 3H), 1.97 (s, 3H), 1.52 (d,  $J = 7.0$  Hz, 3H); <sup>13</sup>C NMR (125 MHz, CDCl<sub>3</sub>)  $\delta$  190.8, 141.6, 129.3, 128.9, 127.9, 126.9, 125.7, 122.4, 121.3, 48.0, 19.8, 11.6, 10.1; HRMS (ESI-Orbitrap) ( $m/z$ )  $[M + H]^+$  calcd for C<sub>15</sub>H<sub>18</sub>NO<sup>+</sup> 228.1383, found 228.1386.

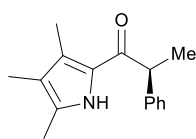

**(4r)** According to the general procedure A, reaction of **1a** (13.2 mg, 0.1 mmol, 1.0 equiv), 2,3,4-trimethyl-1*H*-pyrrole<sup>[61]</sup> (54.6 mg, 0.5 mmol, 5.0 equiv), (*R*)-**3h** (3.3 mg, 0.5 % mmol, 0.05 equiv) afforded **4r** as a white solid (17.1 mg, 71%). Analytical data for compound **4r**: mp 152–153 °C;  $R_f = 0.30$  (petroleum ether/ethyl acetate = 10:1);  $[\alpha]^{25}_D = +81.4$  (c 0.11, CHCl<sub>3</sub>); enantiomeric ratio: 94.5:5.5, the er value of the product was determined by HPLC on a Daicel Chiralcel OD-3 column; eluent, *n*-hexane/2-propanol = 97:3 (v/v); temp, r.t.; flow rate, 1.0 mL/min; uv-vis detection,  $\lambda = 254$  nm;  $t_R$  (major) = 10.6 min;  $t_R$  (minor) = 9.3 min; <sup>1</sup>H NMR (500 MHz, CDCl<sub>3</sub>)  $\delta$  9.55 (s, 1H), 7.36–7.27 (m, 4H), 7.24–7.18 (m, 1H), 4.43 (q,  $J = 7.0$  Hz, 1H), 2.27 (s, 3H), 2.17 (s, 3H), 1.89 (s, 3H), 1.53 (d,  $J = 7.0$  Hz, 3H); <sup>13</sup>C NMR (125 MHz, CDCl<sub>3</sub>)  $\delta$  189.8, 142.1, 132.8, 128.7, 127.9, 127.3, 126.7, 126.6, 118.1, 47.6, 19.8, 12.2, 11.6, 9.0; HRMS (ESI-Orbitrap) ( $m/z$ )  $[M + H]^+$  calcd for C<sub>16</sub>H<sub>20</sub>NO<sup>+</sup> 242.1539, found 242.1542.

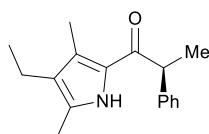

**(4s)** According to the general procedure A, reaction of **1a** (13.2 mg, 0.1 mmol, 1.0 equiv), 3-ethyl-2,4-dimethyl-1*H*-pyrrole (61.6 mg, 0.5 mmol, 5.0 equiv), (*R*)-**3h** (3.3 mg, 0.5 % mmol, 0.05 equiv) afforded **4s** as a white solid (18.9 mg, 74%). Analytical data for compound **4s**: mp 116–117 °C;  $R_f = 0.30$  (petroleum ether/ethyl acetate = 10:1);  $[\alpha]^{25}_D = +50.3$  (c 0.12, CHCl<sub>3</sub>); enantiomeric ratio: 98:2, the er value of the product

was determined by HPLC on a Daicel Chiralcel OD-3 column; eluent, *n*-hexane/2-propanol = 99:1 (v/v); temp, r.t.; flow rate, 1.0 mL/min; uv-vis detection,  $\lambda = 254$  nm;  $t_R$  (major) = 21.4 min;  $t_R$  (minor) = 19.4 min;  $^1\text{H}$  NMR (400 MHz,  $\text{CDCl}_3$ )  $\delta$  9.28 (s, 1H), 7.36–7.27 (m, 4H), 7.24–7.17 (m, 1H), 4.41 (q,  $J = 6.9$  Hz, 1H), 2.34 (q,  $J = 7.5$  Hz, 2H), 2.28 (s, 3H), 2.18 (s, 3H), 1.51 (d,  $J = 6.9$  Hz, 3H), 1.01 (t,  $J = 7.5$  Hz, 3H);  $^{13}\text{C}$  NMR (100 MHz,  $\text{CDCl}_3$ )  $\delta$  189.8, 142.0, 132.3, 128.8, 128.0, 127.4, 126.7, 126.0, 124.9, 47.6, 19.9, 17.3, 15.5, 11.9, 11.6; HRMS (ESI-Orbitrap) ( $m/z$ ) [ $\text{M} + \text{H}$ ] $^+$  calcd for  $\text{C}_{17}\text{H}_{22}\text{NO}^+$  256.1696, found 256.1696.

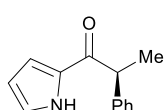

**(4t)** According to the general procedure A, reaction of **1a** (13.2 mg, 0.1 mmol, 1.0 equiv), 1*H*-pyrrole (33.5 mg, 0.5 mmol, 5.0 equiv), (*R*)-**3h** (3.3 mg, 0.5 % mmol, 0.05 equiv) afforded **4t** as a white solid (9.0 mg, 45%). Analytical data for compound **4t**: mp 100–106 °C;  $R_f = 0.30$  (petroleum ether/ethyl acetate = 10:1);  $[\alpha]^{25}_D = +72.5$  (c 0.17,  $\text{CHCl}_3$ ); enantiomeric ratio: 92.5:7.5, the er value of the product was determined by HPLC on a Daicel Chiralcel AD-3 column; eluent, *n*-hexane/2-propanol = 97:3 (v/v); temp, r.t.; flow rate, 1.0 mL/min; uv-vis detection,  $\lambda = 254$  nm;  $t_R$  (major) = 33.4 min;  $t_R$  (minor) = 27.1 min;  $^1\text{H}$  NMR (400 MHz,  $\text{CDCl}_3$ )  $\delta$  9.50 (s, 1H), 7.38–7.33 (m, 2H), 7.33–7.27 (m, 2H), 7.25–7.18 (m, 1H), 7.01–6.96 (m, 1H), 6.94–6.89 (m, 1H), 6.26–6.20 (m, 1H), 4.44 (q,  $J = 6.8$  Hz, 1H), 1.54 (d,  $J = 7.2$  Hz, 3H);  $^{13}\text{C}$  NMR (100 MHz,  $\text{CDCl}_3$ )  $\delta$  191.0, 141.9, 131.4, 128.8, 127.8, 127.0, 124.8, 116.8, 110.8, 47.6, 18.8; HRMS (ESI-Orbitrap) ( $m/z$ ) [ $\text{M} + \text{H}$ ] $^+$  calcd for  $\text{C}_{13}\text{H}_{14}\text{NO}^+$  200.1070, found 200.1073.

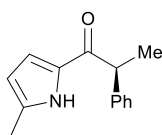

**(4u)** According to the general procedure A, reaction of **1a** (13.2 mg, 0.1 mmol, 1.0 equiv), 2-methyl-1*H*-pyrrole (40.6 mg, 0.5 mmol, 5.0 equiv), (*R*)-**3h** (3.3 mg, 0.5 % mmol, 0.05 equiv) afforded **4u** as a white solid (10.9 mg, 51%). Analytical data for compound **4u**: mp 86–87 °C;  $R_f = 0.30$  (petroleum ether/ethyl acetate = 10:1);  $[\alpha]^{25}_D = +142.1$  (c 0.10,  $\text{CHCl}_3$ ); enantiomeric ratio: 93:7, the er value of the product was determined by HPLC on a Daicel Chiralcel OD-3 column; eluent, *n*-hexane/2-propanol = 97:3 (v/v); temp, r.t.; flow rate, 1.0 mL/min; uv-vis detection,  $\lambda = 254$  nm;  $t_R$  (major) = 12.2 min;  $t_R$  (minor) = 8.2 min;  $^1\text{H}$  NMR (500 MHz,  $\text{CDCl}_3$ )  $\delta$  9.88 (s, 1H), 7.40–7.32 (m, 2H), 7.31–7.26 (m, 2H), 7.23–7.15 (m, 1H), 6.90–6.83 (m, 1H), 5.98–5.91 (m, 1H), 4.41 (q,  $J = 7.0$  Hz, 1H), 2.28 (s, 3H), 1.54 (d,  $J = 7.0$  Hz, 3H);  $^{13}\text{C}$  NMR (125 MHz,  $\text{CDCl}_3$ )  $\delta$  190.2, 142.2, 136.9, 130.4, 128.7, 127.8, 126.8, 118.3,



109.7, 47.0, 18.9, 13.3; HRMS (ESI-Orbitrap) ( $m/z$ )  $[M + H]^+$  calcd for  $C_{14}H_{16}NO^+$  214.1226, found 214.1230.

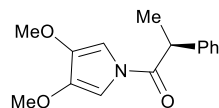

**(4v)** According to the general procedure A, reaction of **1a** (13.2 mg, 0.1 mmol, 1.0 equiv), 3,4-dimethoxy-1*H*-pyrrole<sup>[17]</sup> (63.6 mg, 0.5 mmol, 5.0 equiv), (*R*)-**3h** (3.3 mg, 0.5 % mmol, 0.05 equiv) afforded **4v** as a vesicular solid (14.8 mg, 57%). Analytical data for compound **4v**:  $R_f$  = 0.20 (petroleum ether/ethyl acetate = 10:1);  $[\alpha]^{25}_D = +29.7$  (c 0.15,  $CHCl_3$ ); enantiomeric ratio: 86:14, the er value of the product was determined by HPLC on a Daicel Chiralcel OD-3 column; eluent, *n*-hexane/2-propanol = 97:3 (v/v); temp, r.t.; flow rate, 1.0 mL/min; uv-vis detection,  $\lambda = 254$  nm;  $t_R$  (major) = 11.3 min;  $t_R$  (minor) = 15.5 min;  $^1H$  NMR (500 MHz,  $CDCl_3$ )  $\delta$  7.37–7.28 (m, 4H), 7.26–7.22 (m, 1H), 6.92 (s, 1H), 6.45 (s, 1H), 4.24 (q,  $J = 7.0$  Hz, 1H), 3.72 (s, 6H), 1.57 (d,  $J = 7.0$  Hz, 3H);  $^{13}C$  NMR (125 MHz,  $CDCl_3$ )  $\delta$  170.3, 143.2, 141.0, 129.2, 127.4, 127.2, 98.5, 58.0, 44.2, 20.2; HRMS (ESI-Orbitrap) ( $m/z$ )  $[M + H]^+$  calcd for  $C_{15}H_{18}NO_3^+$  260.1281, found 260.1286.

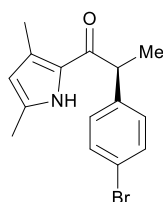

**(4w)** According to the general procedure B, reaction of **5w** (23.9 mg, 0.1 mmol, 1.0 equiv), 2,4-dimethyl-1*H*-pyrrole (19.0 mg, 0.2 mmol, 2.0 equiv), (*R*)-**3h** (3.3 mg, 0.5 % mmol, 0.05 equiv) afforded **4w** as a white solid (23.0 mg, 75%). Analytical data for compound **4w**: mp 114–115 °C;  $R_f$  = 0.30 (petroleum ether/ethyl acetate = 10:1);  $[\alpha]^{25}_D = +66.3$  (c 0.14,  $CHCl_3$ ); enantiomeric ratio: 92:8, the er value of the product was determined by HPLC on a Daicel Chiralcel OD-3 column; eluent, *n*-hexane/2-propanol = 97:3 (v/v); temp, r.t.; flow rate, 1.0 mL/min; uv-vis detection,  $\lambda = 254$  nm;  $t_R$  (major) = 9.5 min;  $t_R$  (minor) = 7.9 min;  $^1H$  NMR (500 MHz,  $CDCl_3$ )  $\delta$  9.41 (s, 1H), 7.41 (d,  $J = 8.0$  Hz, 2H), 7.19 (d,  $J = 8.0$  Hz, 2H), 5.77 (s, 1H), 4.35 (q,  $J = 7.0$  Hz, 1H), 2.31 (s, 3H), 2.22 (s, 3H), 1.48 (d,  $J = 6.5$  Hz, 3H);  $^{13}C$  NMR (125 MHz,  $CDCl_3$ )  $\delta$  189.5, 140.8, 135.5, 131.8, 129.7, 128.5, 128.0, 120.8, 113.3, 46.7, 19.7, 14.7, 13.1; HRMS (ESI-Orbitrap) ( $m/z$ )  $[M + H]^+$  calcd for  $C_{15}H_{17}BrNO^+$  306.0488, found 306.0489

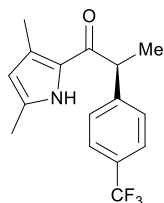

**(4x)** According to the general procedure B, reaction of **5x** (22.8 mg, 0.1 mmol, 1.0 equiv), 2,4-dimethyl-1*H*-pyrrole (19.0 mg, 0.2 mmol, 2.0 equiv), (*R*)-**3h** (3.3 mg, 0.5 % mmol, 0.05 equiv) afforded **4x** as a white solid (17.4 mg, 59%).

Analytical data for compound **4x**: mp 121–122 °C;  $R_f = 0.25$  (petroleum ether/ethyl acetate = 10:1);  $[\alpha]^{25}_D = +45.7$  (c 0.09, CHCl<sub>3</sub>); enantiomeric ratio: 96.5:3.5, the er value of the product was determined by HPLC on a Daicel Chiralcel OD-3 column; eluent, *n*-hexane/2-propanol = 97:3 (v/v); temp, r.t.; flow rate, 1.0 mL/min; uv-vis detection,  $\lambda = 254$  nm;  $t_R$  (major) = 8.6 min;  $t_R$  (minor) = 7.2 min; <sup>19</sup>F NMR (471 MHz, CDCl<sub>3</sub>)  $\delta$  -62.48; <sup>1</sup>H NMR (500 MHz, CDCl<sub>3</sub>)  $\delta$  9.10 (s, 1H), 7.55 (d,  $J = 8.0$  Hz, 2H), 7.43 (d,  $J = 8.0$  Hz, 2H), 5.78 (d,  $J = 2.5$  Hz, 1H), 4.44 (q,  $J = 7.0$  Hz, 1H), 2.32 (s, 3H), 2.22 (s, 3H), 1.52 (d,  $J = 7.0$  Hz, 3H); <sup>13</sup>C NMR (125 MHz, CDCl<sub>3</sub>)  $\delta$  189.1, 145.7, 135.4, 129.2 (q,  $J = 32.1$  Hz), 128.40, 128.35, 128.0, 125.7 (q,  $J = 3.8$  Hz), 124.3 (q,  $J = 270.0$  Hz, CF<sub>3</sub>), 113.4, 47.1, 19.7, 14.7, 13.2; HRMS (ESI-Orbitrap) ( $m/z$ ) [M + H]<sup>+</sup> calcd for C<sub>16</sub>H<sub>17</sub>F<sub>3</sub>NO<sup>+</sup> 296.1257, found 296.1262.

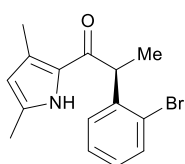

**(4y)** According to the general procedure B, reaction of **5y** (23.9 mg, 0.1 mmol, 1.0 equiv), 2,4-dimethyl-1*H*-pyrrole (19.0 mg, 0.2 mmol, 2.0 equiv), (*R*)-**3h** (3.3 mg, 0.5 % mmol, 0.05 equiv) afforded **4y** as a white solid (23.3 mg, 76%).

Analytical data for compound **4y**: mp 155–156 °C;  $R_f = 0.30$  (petroleum ether/ethyl acetate = 10:1);  $[\alpha]^{25}_D = +205.4$  (c 0.13, CHCl<sub>3</sub>); enantiomeric ratio: 95.5:4.5, the er value of the product was determined by HPLC on a Daicel Chiralcel OD-3 column; eluent, *n*-hexane/2-propanol = 97:3 (v/v); temp, r.t.; flow rate, 1.0 mL/min; uv-vis detection,  $\lambda = 254$  nm;  $t_R$  (major) = 17.6 min;  $t_R$  (minor) = 20.7 min; <sup>1</sup>H NMR (500 MHz, CDCl<sub>3</sub>)  $\delta$  9.47 (s, 1H), 7.56 (d,  $J = 8.0$  Hz, 1H), 7.32–7.28 (m, 1H), 7.25–7.20 (m, 1H), 7.13–7.05 (m, 1H), 5.76 (d,  $J = 2.5$  Hz, 1H), 4.71 (q,  $J = 7.0$  Hz, 1H), 2.25 (s, 3H), 2.21 (s, 3H), 1.49 (d,  $J = 7.0$  Hz, 3H); <sup>13</sup>C NMR (125 MHz, CDCl<sub>3</sub>)  $\delta$  189.2, 141.1, 135.1, 132.9, 129.2, 129.1, 128.4, 128.1, 128.0, 124.7, 113.1, 47.0, 17.8, 14.2, 13.2; HRMS (ESI-Orbitrap) ( $m/z$ ) [M + Na]<sup>+</sup> calcd for C<sub>15</sub>H<sub>16</sub>BrNNaO<sup>+</sup> 328.0307, found 328.0309.

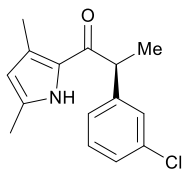

(**4z**) According to the general procedure B, reaction of **5z** (19.5 mg, 0.1 mmol, 1.0 equiv), 2,4-dimethyl-1*H*-pyrrole (19.0 mg, 0.2 mmol, 2.0 equiv), (*R*)-**3h** (3.3 mg, 0.5 % mmol, 0.05 equiv) afforded **4z** as a white solid (19.1 mg, 73%). Analytical data for compound **4z**: mp 116–117 °C;  $R_f = 0.30$  (petroleum ether/ethyl acetate = 10:1);  $[\alpha]^{25}_D = +104.5$  (c 0.16, CHCl<sub>3</sub>); enantiomeric ratio: 96.5:3.5, the er value of the product was determined by HPLC on a Daicel Chiralcel OD-3 column; eluent, *n*-hexane/2-propanol = 97:3 (v/v); temp, r.t.; flow rate, 1.0 mL/min; uv-vis detection,  $\lambda = 254$  nm;  $t_R$  (major) = 9.3 min;  $t_R$  (minor) = 7.8 min; <sup>1</sup>H NMR (500 MHz, CDCl<sub>3</sub>)  $\delta$  9.66 (s, 1H), 7.34–7.30 (m, 1H), 7.24–7.16 (m, 3H), 5.79 (d,  $J = 2.5$  Hz, 1H), 4.38 (q,  $J = 7.0$  Hz, 1H), 2.34 (s, 3H), 2.23 (s, 3H), 1.51 (d,  $J = 7.0$  Hz, 3H); <sup>13</sup>C NMR (125 MHz, CDCl<sub>3</sub>)  $\delta$  189.3, 143.7, 135.8, 134.5, 129.9, 128.6, 128.1, 128.0, 127.0, 126.2, 113.3, 46.9, 19.7, 14.8, 13.1; HRMS (ESI-Orbitrap) ( $m/z$ ) [ $M + Na$ ]<sup>+</sup> calcd for C<sub>15</sub>H<sub>16</sub>ClNaO<sup>+</sup> 284.0813, found 284.0812.

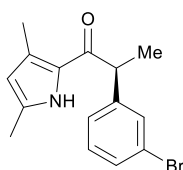

(**4aa**) According to the general procedure B, reaction of **5aa** (23.9 mg, 0.1 mmol, 1.0 equiv), 2,4-dimethyl-1*H*-pyrrole (19.0 mg, 0.2 mmol, 2.0 equiv), (*R*)-**3h** (3.3 mg, 0.5 % mmol, 0.05 equiv) afforded **4aa** as a white solid (24.8 mg, 81%). Analytical data for compound **4aa**: mp 95–96 °C;  $R_f = 0.30$  (petroleum ether/ethyl acetate = 10:1);  $[\alpha]^{25}_D = +95.1$  (c 0.16, CHCl<sub>3</sub>); enantiomeric ratio: 95.5:4.5, the er value of the product was determined by HPLC on a Daicel Chiralcel OD-3 column; eluent, *n*-hexane/2-propanol = 97:3 (v/v); temp, r.t.; flow rate, 1.0 mL/min; uv-vis detection,  $\lambda = 254$  nm;  $t_R$  (major) = 9.8 min;  $t_R$  (minor) = 8.2 min; <sup>1</sup>H NMR (500 MHz, CDCl<sub>3</sub>)  $\delta$  9.52 (s, 1H), 7.49–7.45 (m, 1H), 7.36–7.31 (m, 1H), 7.26–7.21 (m, 1H), 7.19–7.12 (m, 1H), 5.79 (d,  $J = 3.0$  Hz, 1H), 4.36 (q,  $J = 7.0$  Hz, 1H), 2.34 (s, 3H), 2.22 (s, 3H), 1.50 (d,  $J = 7.0$  Hz, 3H); <sup>13</sup>C NMR (125 MHz, CDCl<sub>3</sub>)  $\delta$  189.3, 144.0, 135.7, 131.0, 130.2, 130.0, 128.6, 128.0, 126.7, 122.8, 113.3, 46.9, 19.8, 14.8, 13.2; HRMS (ESI-Orbitrap) ( $m/z$ ) [ $M + H$ ]<sup>+</sup> calcd for C<sub>15</sub>H<sub>17</sub>BrNO<sup>+</sup> 306.0488, found 306.0488.

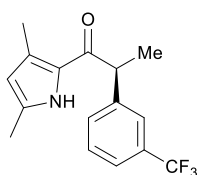

(**4ab**) According to the general procedure B, reaction of **5ab** (22.8 mg, 0.1 mmol, 1.0 equiv), 2,4-dimethyl-1*H*-pyrrole (19.0 mg, 0.2 mmol, 2.0 equiv), (*R*)-**3h** (3.3 mg, 0.5 % mmol, 0.05 equiv) afforded **4ab** as a yellow solid (22.4 mg, 76%). Analytical data for compound **4ab**: mp 122–123 °C;  $R_f = 0.25$

(petroleum ether/ethyl acetate = 10:1);  $[\alpha]_D^{25} = +48.4$  (c 0.11,  $\text{CHCl}_3$ ); enantiomeric ratio: 96.5:3.5, the er value of the product was determined by HPLC on a Daicel Chiralcel OD-3 column; eluent, *n*-hexane/2-propanol = 97:3 (v/v); temp, r.t.; flow rate, 1.0 mL/min; uv-vis detection,  $\lambda = 254$  nm;  $t_R$  (major) = 8.8 min;  $t_R$  (minor) = 7.5 min;  $^{19}\text{F}$  NMR (471 MHz,  $\text{CDCl}_3$ )  $\delta$  -62.51;  $^1\text{H}$  NMR (500 MHz,  $\text{CDCl}_3$ )  $\delta$  9.63 (s, 1H), 7.59 (s, 1H), 7.52 (d,  $J = 8.0$  Hz, 1H), 7.48 (d,  $J = 8.0$  Hz, 1H), 7.44–7.36 (m, 1H), 5.80 (d,  $J = 2.5$  Hz, 1H), 4.48 (q,  $J = 7.0$  Hz, 1H), 2.36 (s, 3H), 2.21 (s, 3H), 1.54 (d,  $J = 7.0$  Hz, 3H);  $^{13}\text{C}$  NMR (125 MHz,  $\text{CDCl}_3$ )  $\delta$  189.2, 142.6, 135.9, 131.5, 131.0 (d,  $J = 31.9$  Hz), 129.1, 128.6, 127.9, 124.9 (q,  $J = 3.8$  Hz), 124.3 (q,  $J = 270.8$  Hz,  $\text{CF}_3$ ), 123.7 (q,  $J = 3.8$  Hz), 113.4, 47.0, 19.8, 14.8, 13.1; HRMS (ESI-Orbitrap) ( $m/z$ )  $[\text{M} + \text{H}]^+$  calcd for  $\text{C}_{16}\text{H}_{17}\text{F}_3\text{NO}^+$  296.1257, found 296.1261.

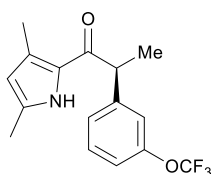

**(4ac)** According to the general procedure B, reaction of **5ac** (24.4 mg, 0.1 mmol, 1.0 equiv), 2,4-dimethyl-1*H*-pyrrole (19.0 mg, 0.2 mmol, 2.0 equiv), (*R*)-**3h** (3.3 mg, 0.5 % mmol, 0.05 equiv) afforded **4ac** as a yellow solid (21.5 mg, 69%). Analytical data for compound **4ac**: mp 93–94 °C;  $R_f = 0.25$  (petroleum ether/ethyl acetate = 10:1);  $[\alpha]_D^{25} = +70.7$  (c 0.13,  $\text{CHCl}_3$ ); enantiomeric ratio: 97:3, the er value of the product was determined by HPLC on a Daicel Chiralcel OD-3 column; eluent, *n*-hexane/2-propanol = 97:3 (v/v); temp, r.t.; flow rate, 1.0 mL/min; uv-vis detection,  $\lambda = 254$  nm;  $t_R$  (major) = 7.4 min;  $t_R$  (minor) = 6.5 min;  $^{19}\text{F}$  NMR (471 MHz,  $\text{CDCl}_3$ )  $\delta$  -55.7;  $^1\text{H}$  NMR (500 MHz,  $\text{CDCl}_3$ )  $\delta$  9.23 (s, 1H), 7.31 (t,  $J = 8.0$  Hz, 1H), 7.26–7.23 (m, 1H), 7.19 (s, 1H), 7.09–7.05 (m, 1H), 5.79 (d,  $J = 2.5$  Hz, 1H), 4.40 (q,  $J = 7.0$  Hz, 1H), 2.33 (s, 3H), 2.22 (s, 3H), 1.51 (d,  $J = 7.0$  Hz, 3H);  $^{13}\text{C}$  NMR (125 MHz,  $\text{CDCl}_3$ )  $\delta$  189.2, 149.5, 144.0, 135.6, 130.0, 128.5, 128.0, 126.3, 120.8, 120.6 (q,  $J = 255.4$  Hz,  $\text{CF}_3$ ), 119.2, 113.3, 46.9, 19.7, 14.7, 13.1; HRMS (ESI-Orbitrap) ( $m/z$ )  $[\text{M} + \text{H}]^+$  calcd for  $\text{C}_{16}\text{H}_{17}\text{F}_3\text{NO}_2^+$  312.1206, found 312.1205.

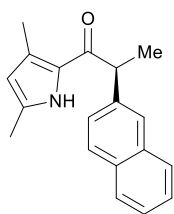

**(4ad)** According to the general procedure B, reaction of **5ad** (21.0 mg, 0.1 mmol, 1.0 equiv), 2,4-dimethyl-1*H*-pyrrole (19.0 mg, 0.2 mmol, 2.0 equiv), (*R*)-**3h** (3.3 mg, 0.5 % mmol, 0.05 equiv) afforded **4ad** as a yellow solid (22.5 mg, 81%). Analytical data for compound **4ad**: mp 164–165 °C;  $R_f = 0.30$  (petroleum ether/ethyl acetate = 10:1);  $[\alpha]_D^{25} = +95.3$  (c 0.15,  $\text{CHCl}_3$ ); enantiomeric ratio: 91:9, the er value of

the product was determined by HPLC on a Daicel Chiralcel OD-3 column; eluent, *n*-hexane/2-propanol = 97:3 (v/v); temp, r.t.; flow rate, 1.0 mL/min; uv-vis detection,  $\lambda = 254$  nm;  $t_R$  (major) = 12.8 min;  $t_R$  (minor) = 9.4 min;  $^1\text{H}$  NMR (500 MHz,  $\text{CDCl}_3$ )  $\delta$  9.42 (s, 1H), 7.82–7.75 (m, 3H), 7.73 (s, 1H), 7.50–7.46 (m, 1H), 7.46–7.40 (m, 2H), 5.75 (d,  $J = 3.0$  Hz, 1H), 4.55 (q,  $J = 7.0$  Hz, 1H), 2.34 (s, 3H), 2.21 (s, 3H), 1.60 (d,  $J = 7.0$  Hz, 3H);  $^{13}\text{C}$  NMR (125 MHz,  $\text{CDCl}_3$ )  $\delta$  190.0, 139.3, 135.1, 133.7, 132.5, 128.4, 128.3, 127.9, 127.7, 126.6, 126.3, 126.1, 125.7, 113.1, 47.6, 19.8, 14.8, 13.2; HRMS (ESI-Orbitrap) ( $m/z$ )  $[\text{M} + \text{H}]^+$  calcd for  $\text{C}_{19}\text{H}_{20}\text{NO}^+$  278.1539, found 278.1540.

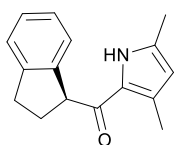

**(4ae)** According to the general procedure B, reaction of **5ae** (20.0 mg, 0.1 mmol, 1.0 equiv), 2,4-dimethyl-1*H*-pyrrole (19.0 mg, 0.2 mmol, 2.0 equiv), (*R*)-**3h** (3.3 mg, 0.5 % mmol, 0.05 equiv) afforded **4ae** as a white solid (15.3 mg, 64%). Analytical data for compound **4ae**: mp 153–154 °C;  $R_f = 0.30$  (petroleum ether/ethyl acetate = 10:1);  $[\alpha]_D^{25} = -116.4$  (c 0.13,  $\text{CHCl}_3$ ); enantiomeric ratio: 99:1, the er value of the product was determined by HPLC on a Daicel Chiralcel OD-3 column; eluent, *n*-hexane/2-propanol = 97:3 (v/v); temp, r.t.; flow rate, 1.0 mL/min; uv-vis detection,  $\lambda = 254$  nm;  $t_R$  (major) = 15.5 min;  $t_R$  (minor) = 17.1 min;  $^1\text{H}$  NMR (500 MHz,  $\text{CDCl}_3$ )  $\delta$  9.39 (s, 1H), 7.27 (s, 1H), 7.22–7.14 (m, 1H), 7.14–7.07 (m, 2H), 5.88 (d,  $J = 3.0$  Hz, 1H), 4.76 (t,  $J = 7.8$  Hz, 1H), 3.18–3.07 (m, 1H), 3.03–2.93 (m, 1H), 2.56–2.47 (m, 1H), 2.45 (s, 3H), 2.41–2.31 (m, 1H), 2.21 (s, 3H);  $^{13}\text{C}$  NMR (125 MHz,  $\text{CDCl}_3$ )  $\delta$  189.9, 144.9, 142.4, 135.3, 128.7, 128.5, 127.2, 126.5, 124.8, 124.5, 113.4, 52.8, 32.2, 29.4, 14.4, 13.1; HRMS (ESI-Orbitrap) ( $m/z$ )  $[\text{M} + \text{H}]^+$  calcd for  $\text{C}_{16}\text{H}_{18}\text{NO}^+$  240.1383, found 240.1389.

## References

- [1] Baigrie, L. M.; Seiklay, H. R.; Tidwell, T. T. *J. Am. Chem. Soc.* **1985**, *107*, 5391-5396.
- [2] Schmittel, M.; von Seggern, H. *J. Am. Chem. Soc.* **1993**, *115*, 2165-2177.
- [3] Zuhl, A. M.; Mohr, J. T.; Bachovchin, D. A.; Niessen, S.; Hsu, K.; Berlin, J. M.; Dochnahl, M.; López-Alberca, M. P.; Fu, G. C.; Cravatt, B. F. *J. Am. Chem. Soc.* **2012**, *134*, 5068-5071.
- [4] Rasik, C. M.; Brown, M. K. *J. Am. Chem. Soc.* **2013**, *135*, 1673-1676.
- [5] Panda, M.; Mondal, M.; Chen, S.; Ibrahim, A. A.; Twardy, D. J.; Kerrigan, N. J. *Eur. J. Org. Chem.* **2020**, *35*, 5752-5764.
- [6] Ma, P.-J.; Tang, F.; Yao, Y.; Lu, C.-D. *Org. Lett.* **2019**, *21*, 4671-4675.
- [7] Dai, X.; Nakai, T.; Romero, J. A. C.; Fu, G. C. *Angew. Chem. Int. Ed.* **2007**, *46*, 4367-4369.
- [8] Duguet, N.; Slawin, A. M. Z.; Smith, A. D. *Org. Lett.* **2009**, *11*, 3858-3861.
- [9] Xu, B.; Zhu, S.-F.; Zuo, X.-D.; Zhang, Z.-C.; Zhou, Q.-L. *Angew. Chem. Int. Ed.* **2014**, *53*, 3913-3916
- [10] Yang, J.; Ke, C.-Q.; Zhang, D.; Liu, X.-H.; Feng, X.-M. *Org. Lett.* **2018**, *20*, 4536-4539.
- [11] Meng, J.; Ding, W.-W.; Han, Z.-Y. *Org. Lett.* **2019**, *21*, 9801-9805.
- [12] Fan, T.; Zhang, Z.-J.; Zhang, Y. C.; Song, J. *Org. Lett.* **2019**, *21*, 7897-7901.
- [13] Liu, J.; Li, M.-M.; Qu, B.-L.; Lu, L.-Q.; Xiao, W.-J. *Chem. Commun.* **2019**, *55*, 2031-2034.
- [14] Poirel, A.; Nicola, A. D.; Retailleau, P.; Ziessel, R. *J. Org. Chem.* **2012**, *77*, 7512-7525.
- [15] Robben, U.; Lindner, I.; Gärtner, W. *J. Am. Chem. Soc.* **2008**, *130*, 11303-11311.
- [16] Smithen, D. A.; Cameron, T. S.; Thompson, A. *Org. Lett.* **2011**, *13*, 5846-5849.
- [17] Merz, A.; Meyer, T. *Synthesis* **1999**, *1*, 94-99.

## Determination of the configuration of product 4

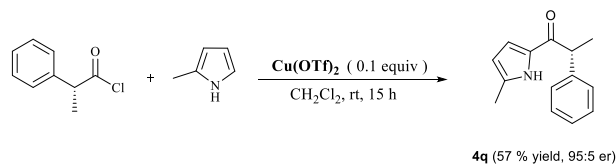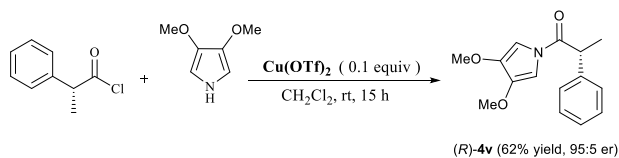

Under argon atmosphere, a flame-dried 10 ml Schlenk tube was charged with  $\text{Cu}(\text{OTf})_2$  (0.03 mmol, 0.1 equiv) and  $\text{CH}_2\text{Cl}_2$  (3.0 mL). Then, 2-methyl-1*H*-pyrrole (0.9 mmol, 3.0 equiv.) and *(R)*-acid chloride (0.3 mmol, 1.0 equiv.) in  $\text{CH}_2\text{Cl}_2$  (1.0 ml) were added. The resulting solution was stirred for 15 h at room temperature. The solution was evaporated under reduced pressure, and the residue was purified by silica gel chromatography (petroleum ether/ethyl acetate = 30:1 - 15:1) to give the product *(R)*-**4q** (57%). The same procedure was followed for the preparation of *(R)*-**4v** (62%).

## Chiral HPLC analysis of *(R)*-**4q** prepared with *(R)*-2-phenylpropanoyl chloride and pyrroles

Daicel Chiralcel OD-3 column, *n*-hexane/2-propanol = 97:3 (v/v), 1.0 mL/min, 254 nm, r.t

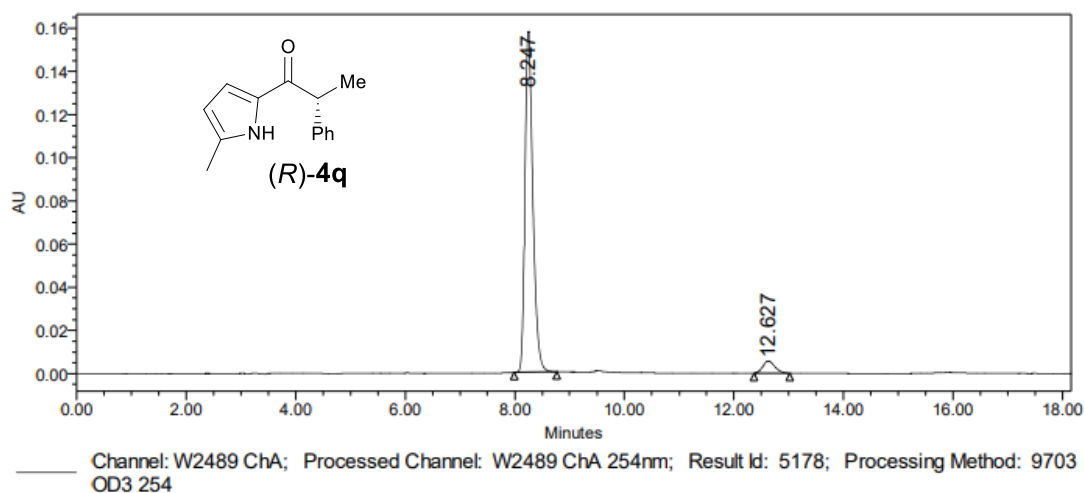

### Processed Channel Descr.: W2489 ChA 254nm

|   | Processed Channel Descr. | RT     | Area    | % Area | Height |
|---|--------------------------|--------|---------|--------|--------|
| 1 | W2489 ChA 254nm          | 8.247  | 1573269 | 94.89  | 157834 |
| 2 | W2489 ChA 254nm          | 12.627 | 84724   | 5.11   | 5612   |

HPLC of *(R)*-**4q** prepared from *(R)*-2-phenylpropanoyl chloride

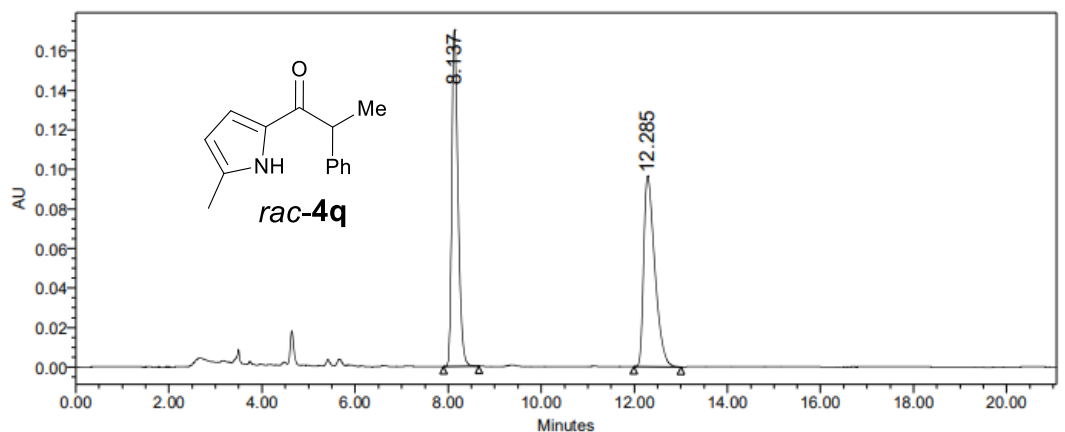

Channel: W2489 ChA; Processed Channel: W2489 ChA 254nm; Result Id: 5197; Processing Method: 9703 OD 3 254

**Processed Channel Descr.: W2489 ChA 254nm**

|   | Processed Channel Descr. | RT     | Area    | % Area | Height |
|---|--------------------------|--------|---------|--------|--------|
| 1 | W2489 ChA 254nm          | 8.137  | 1599096 | 50.06  | 170342 |
| 2 | W2489 ChA 254nm          | 12.285 | 1595050 | 49.94  | 96365  |

HPLC of *rac*-4q

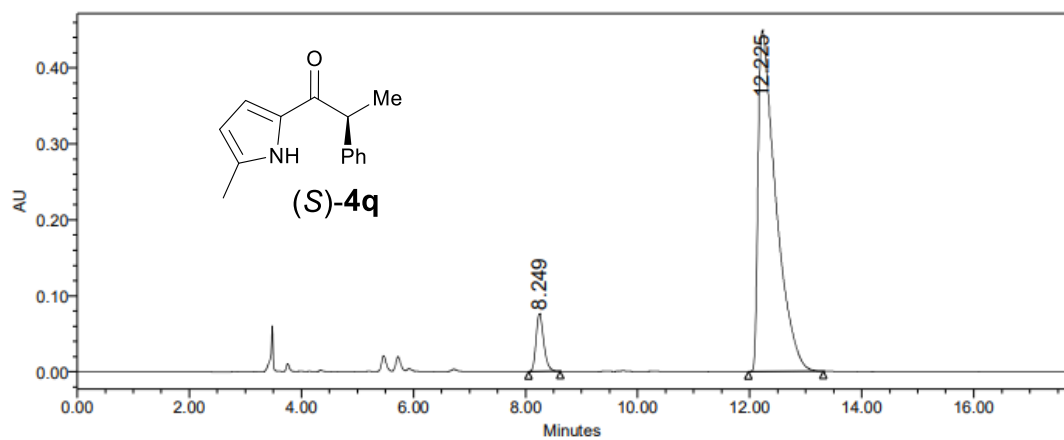

Channel: W2489 ChA; Processed Channel: W2489 ChA 254nm; Result Id: 5176; Processing Method: 9703 OD3 254

**Processed Channel Descr.: W2489 ChA 254nm**

|   | Processed Channel Descr. | RT     | Area    | % Area | Height |
|---|--------------------------|--------|---------|--------|--------|
| 1 | W2489 ChA 254nm          | 8.249  | 719610  | 6.77   | 75966  |
| 2 | W2489 ChA 254nm          | 12.225 | 9904893 | 93.23  | 448702 |

HPLC of (*S*)-4q prepared from the reaction catalyzed by (*R*)-3h



Daicel Chiralcel OD-3 column, n-hexane/2-propanol = 97:3 (v/v), 1.0 mL/min, 254 nm, r.t

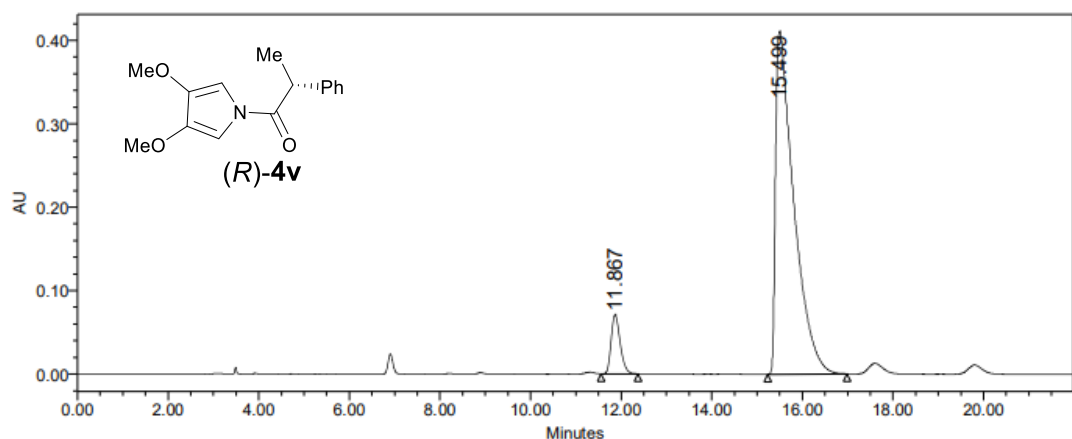

Channel: W2489 ChA; Processed Channel: W2489 ChA 254nm; Result Id: 4325; Processing Method: 9703 OD 3 254

**Processed Channel Descr.: W2489 ChA 254nm**

|   | Processed Channel Descr. | RT     | Area     | % Area | Height |
|---|--------------------------|--------|----------|--------|--------|
| 1 | W2489 ChA 254nm          | 11.867 | 985393   | 7.90   | 70980  |
| 2 | W2489 ChA 254nm          | 15.499 | 11495425 | 92.10  | 410791 |

HPLC of (*R*)-4v prepared from (*R*)-2-phenylpropanoyl chloride

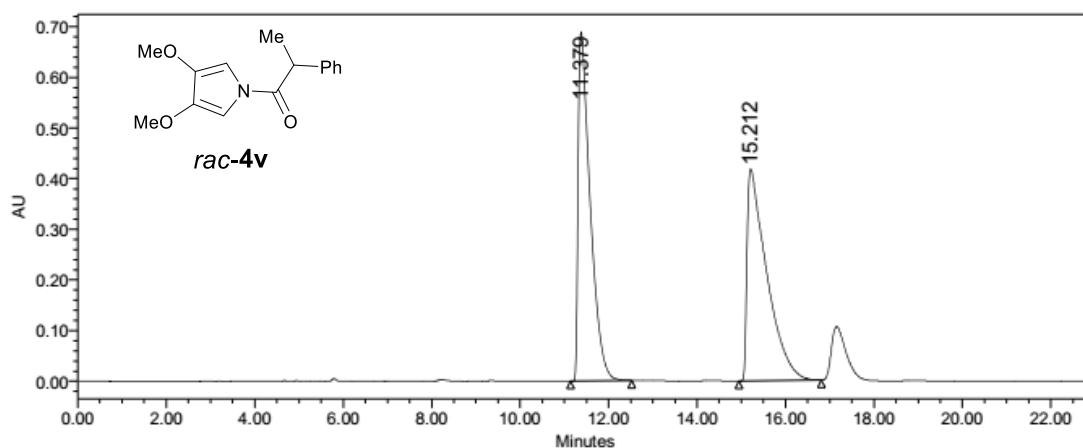

Channel: W2489 ChA; Processed Channel: W2489 ChA 254nm; Result Id: 5018; Processing Method: 9703 OD3 254

**Processed Channel Descr.: W2489 ChA 254nm**

|   | Processed Channel Descr. | RT     | Area     | % Area | Height |
|---|--------------------------|--------|----------|--------|--------|
| 1 | W2489 ChA 254nm          | 11.379 | 13014096 | 50.05  | 689246 |
| 2 | W2489 ChA 254nm          | 15.212 | 12986094 | 49.95  | 417979 |

HPLC of *rac*-4v

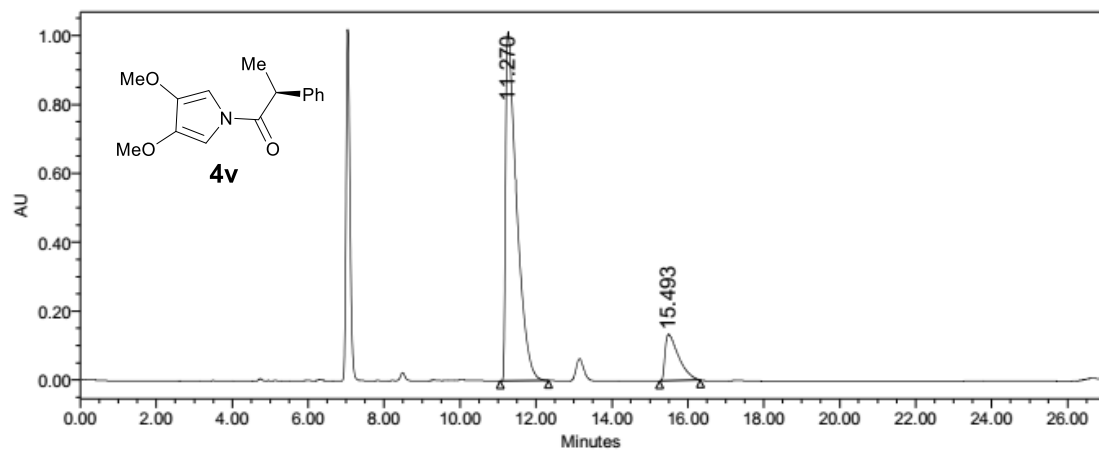

Channel: W2489 ChA; Processed Channel: W2489 ChA 254nm; Result Id: 5022; Processing Method: 9703 OD3 254

**Processed Channel Descr.: W2489 ChA 254nm**

|   | Processed Channel Descr. | RT     | Area     | % Area | Height  |
|---|--------------------------|--------|----------|--------|---------|
| 1 | W2489 ChA 254nm          | 11.270 | 20417225 | 85.90  | 1014136 |
| 2 | W2489 ChA 254nm          | 15.493 | 3352216  | 14.10  | 135237  |

HPLC of (*S*)-**4v** prepared from the reaction catalyzed by (*R*)-**3h**

# $^1\text{H}$ NMR and $^{13}\text{C}$ NMR spectra for all of new compounds

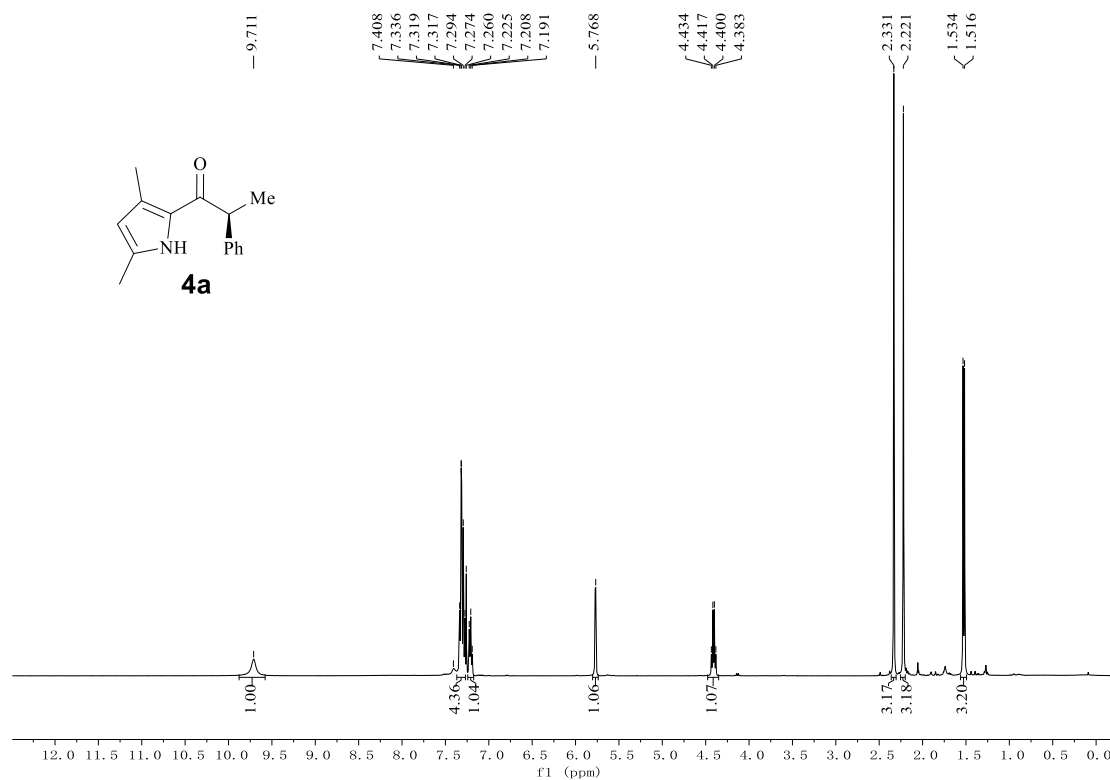

$^1\text{H}$  NMR spectrum (CDCl<sub>3</sub>, 400 MHz) of **4a**

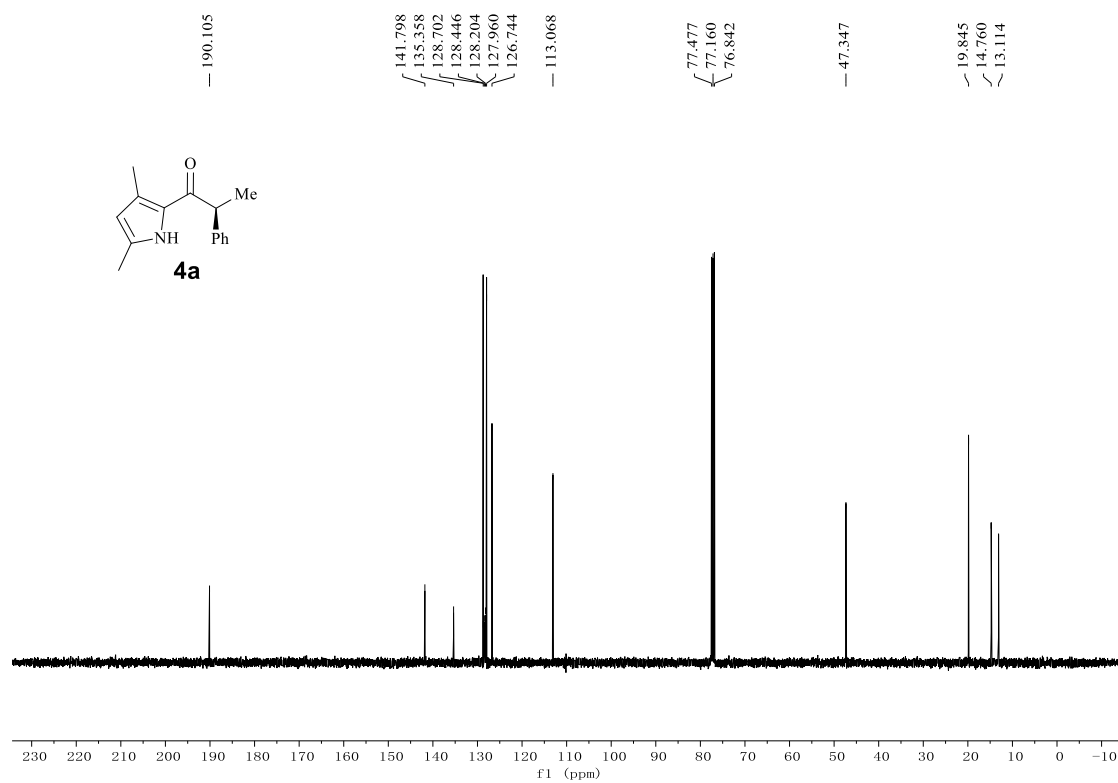

$^{13}\text{C}$  NMR spectrum (CDCl<sub>3</sub>, 100 MHz) of **4a**

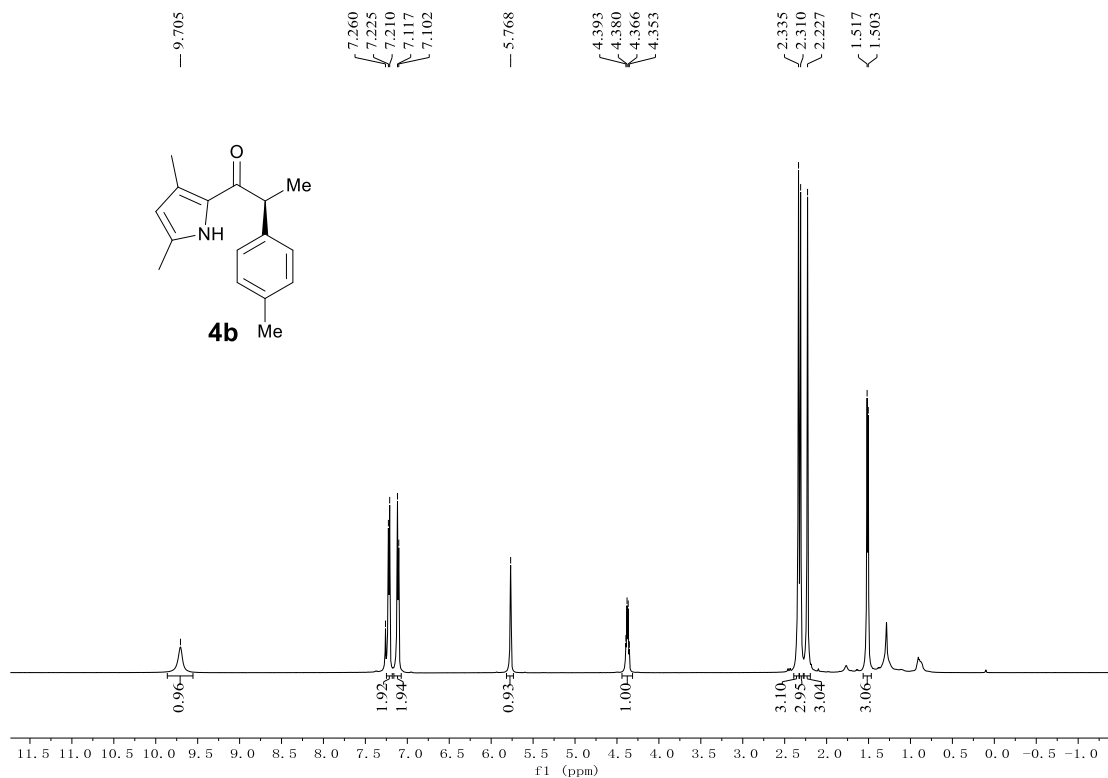

$^1\text{H}$  NMR spectrum ( $\text{CDCl}_3$ , 500 MHz) of **4b**

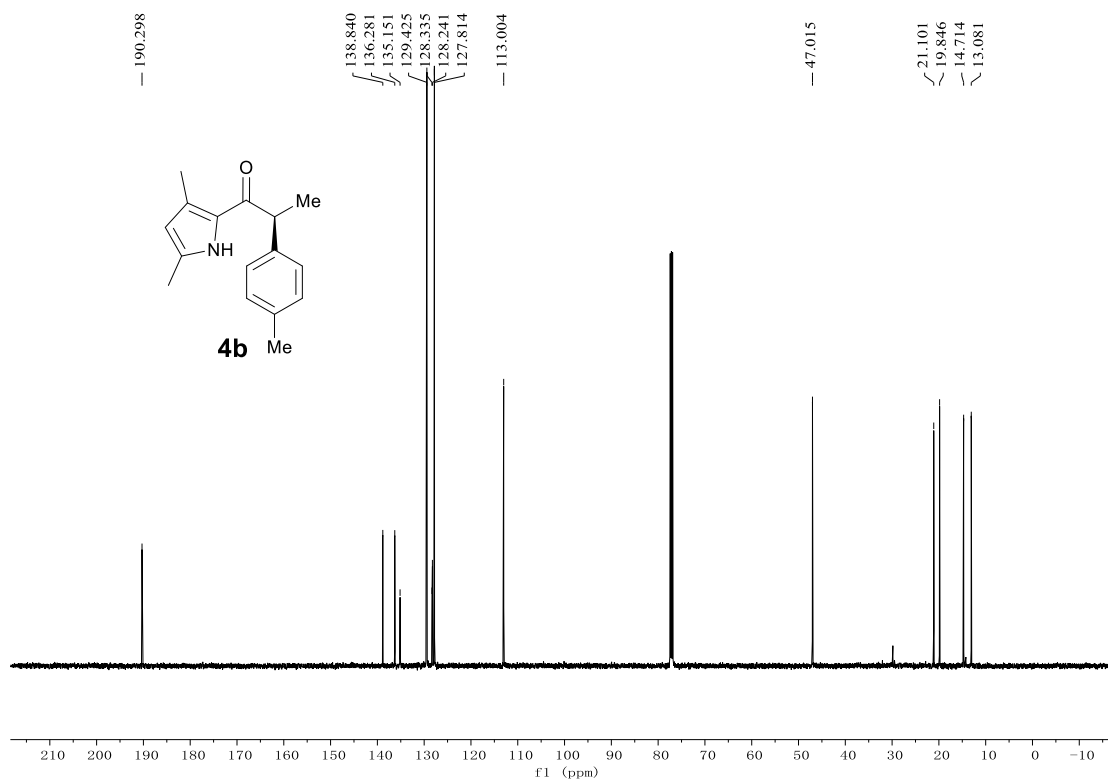

$^{13}\text{C}$  NMR spectrum ( $\text{CDCl}_3$ , 125 MHz) of **4b**

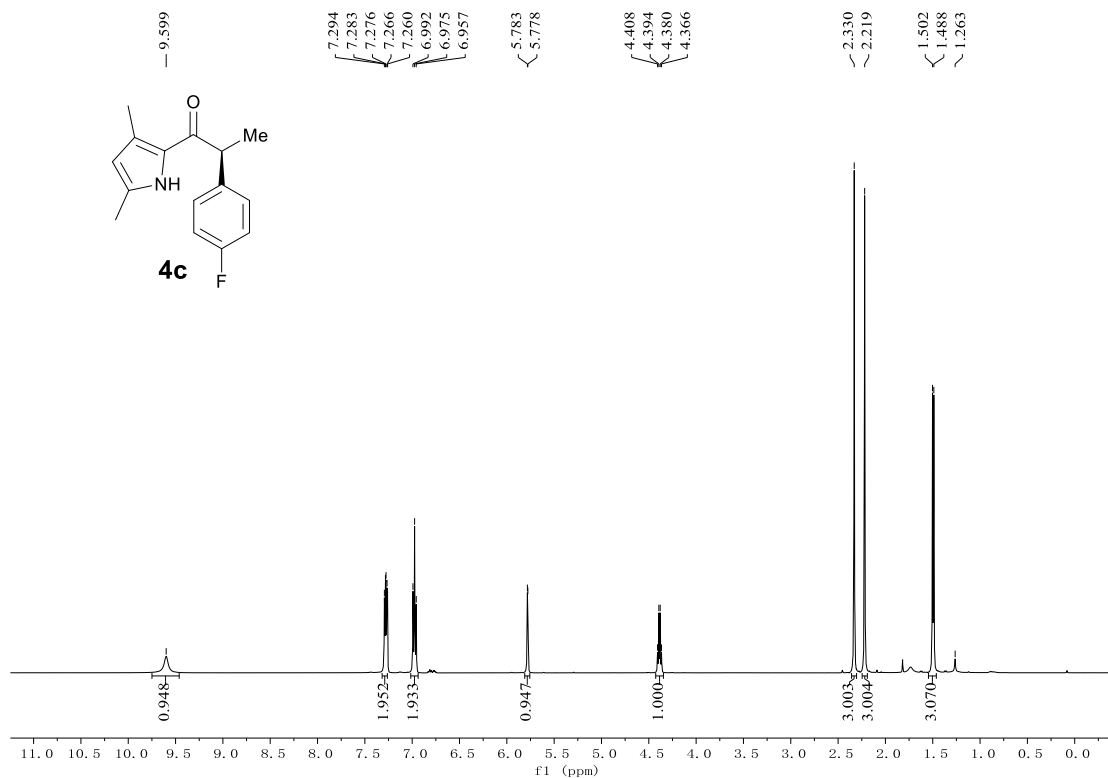

<sup>1</sup>H NMR spectrum (CDCl<sub>3</sub>, 500 MHz) of **4c**

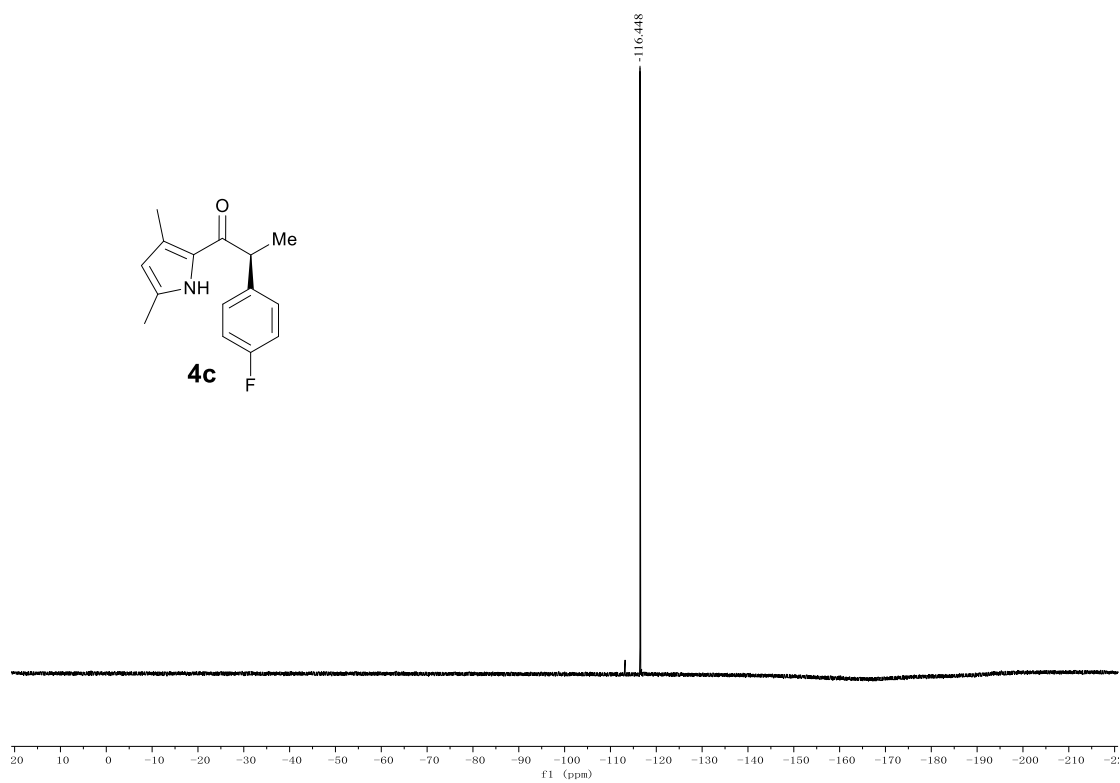

<sup>19</sup>F NMR spectrum (CDCl<sub>3</sub>, 471 MHz) of **4c**

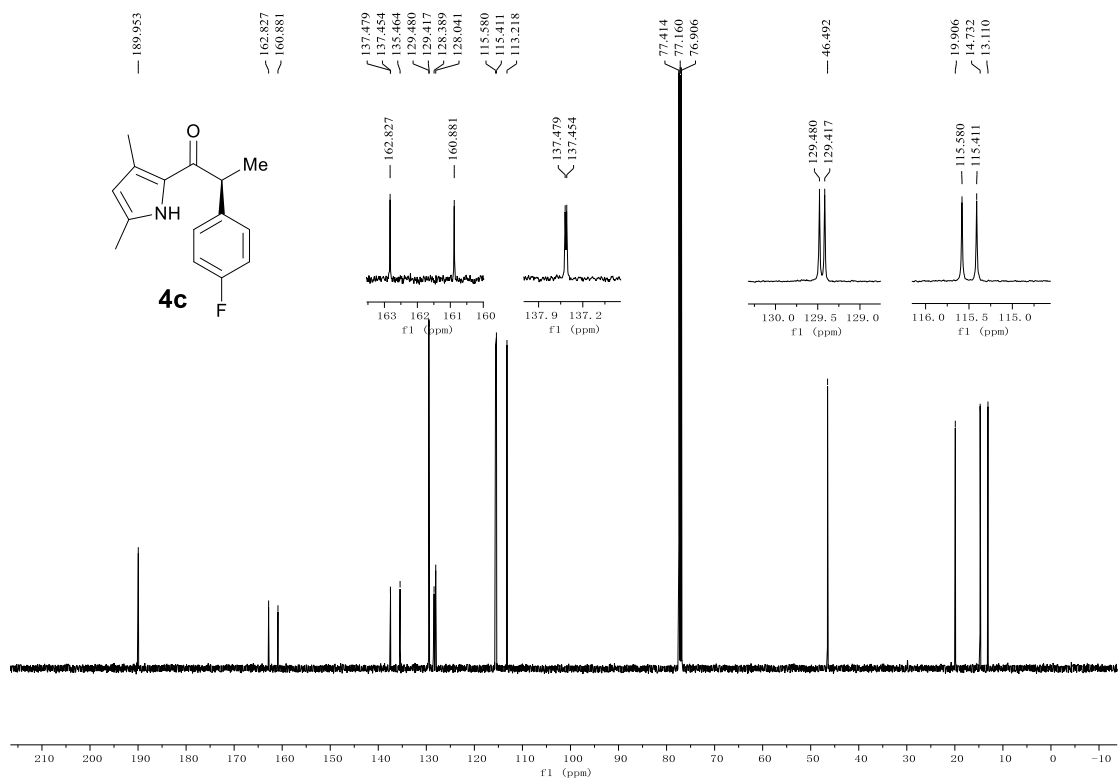

<sup>13</sup>C NMR spectrum (CDCl<sub>3</sub>, 125 MHz) of **4c**

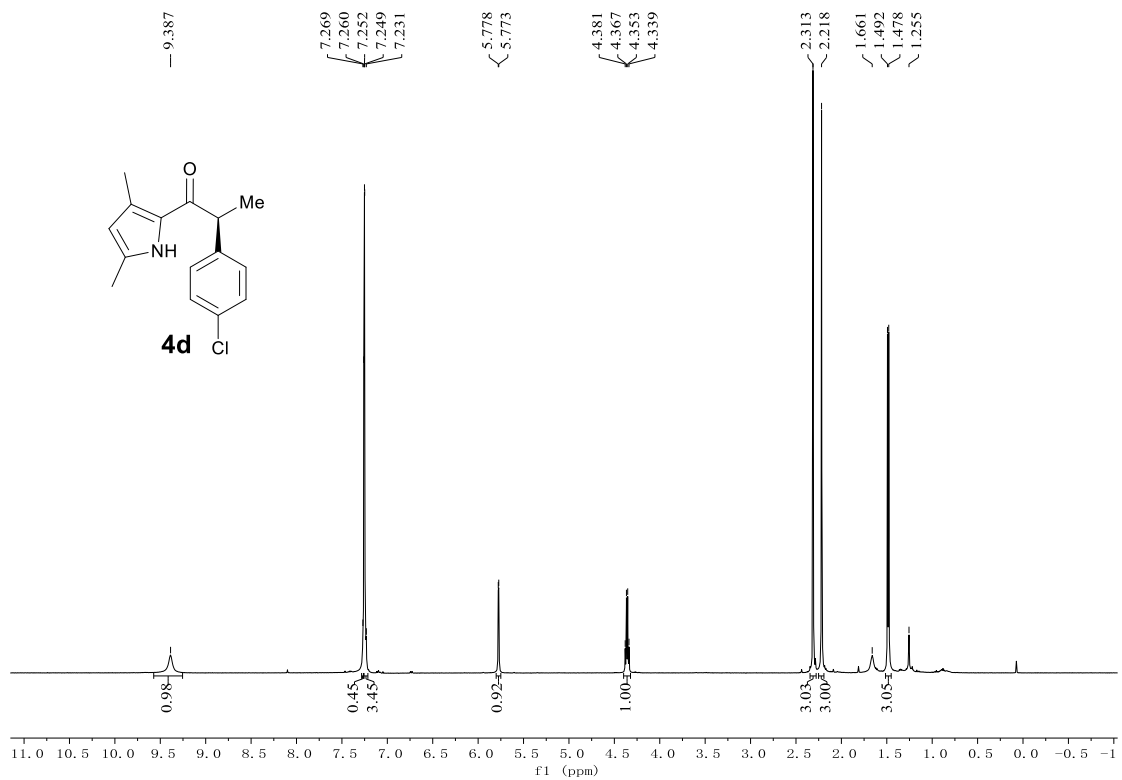

<sup>1</sup>H NMR spectrum (CDCl<sub>3</sub>, 500 MHz) of **4d**

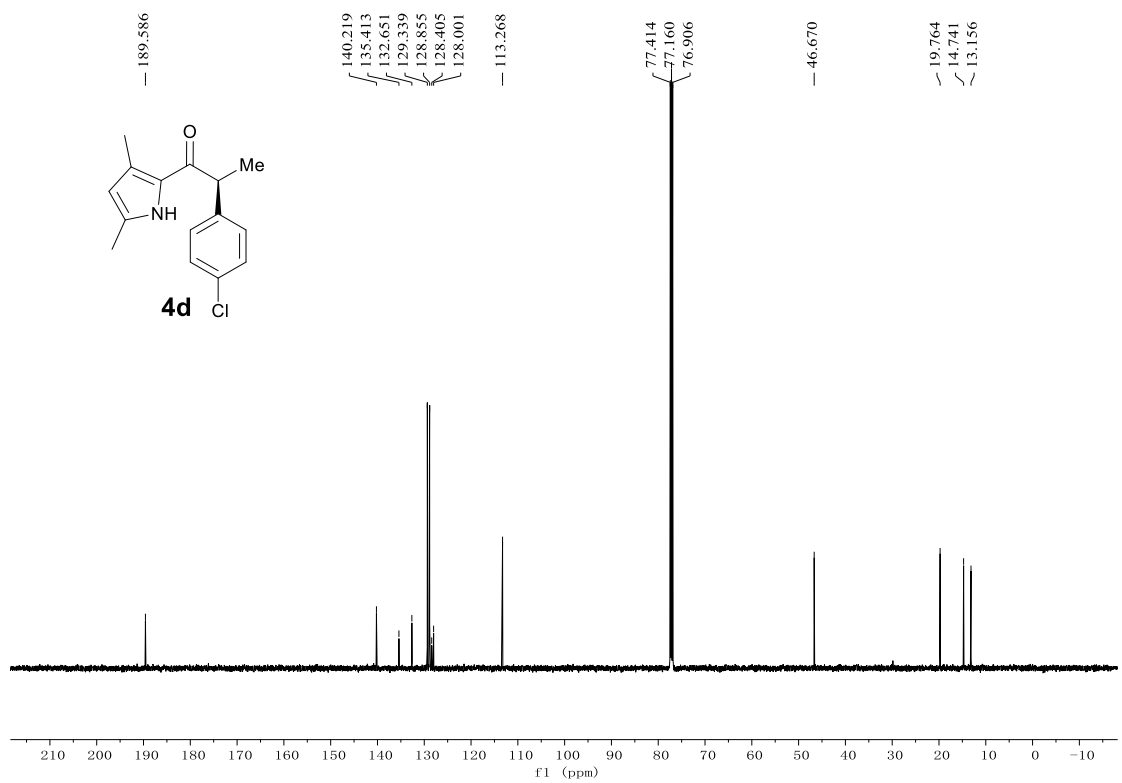

<sup>13</sup>C NMR spectrum (CDCl<sub>3</sub>, 125 MHz) of **4d**

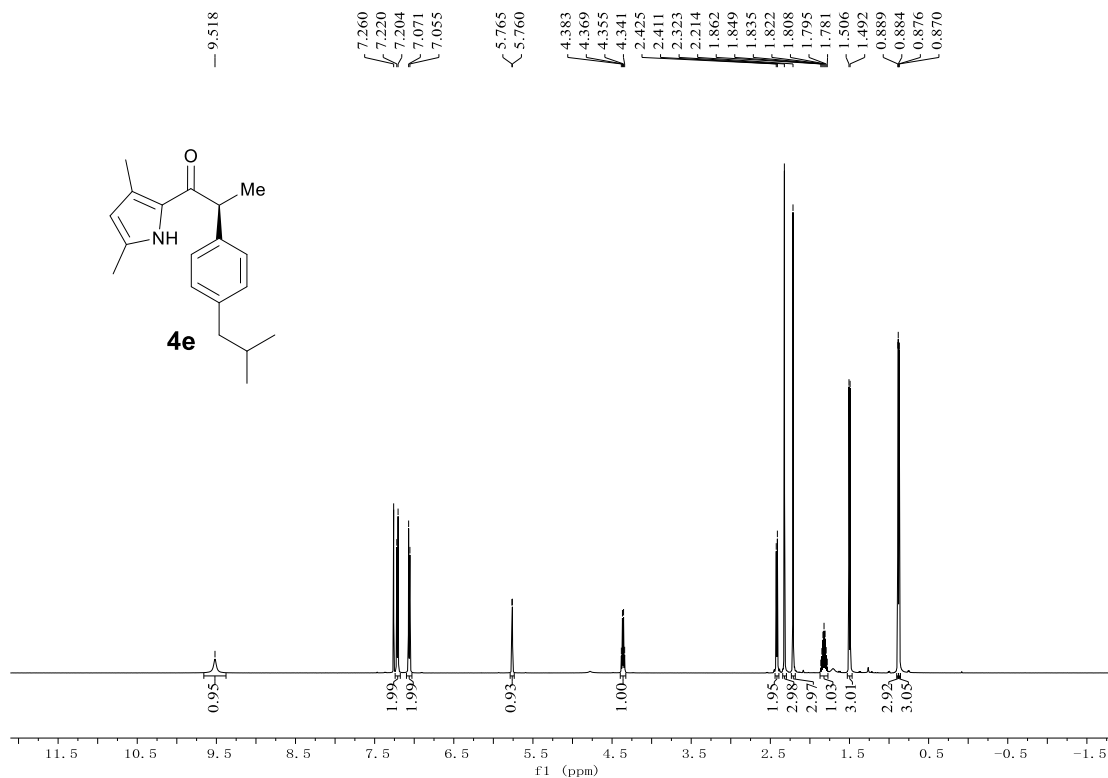

<sup>1</sup>H NMR spectrum (CDCl<sub>3</sub>, 500 MHz) of **4e**

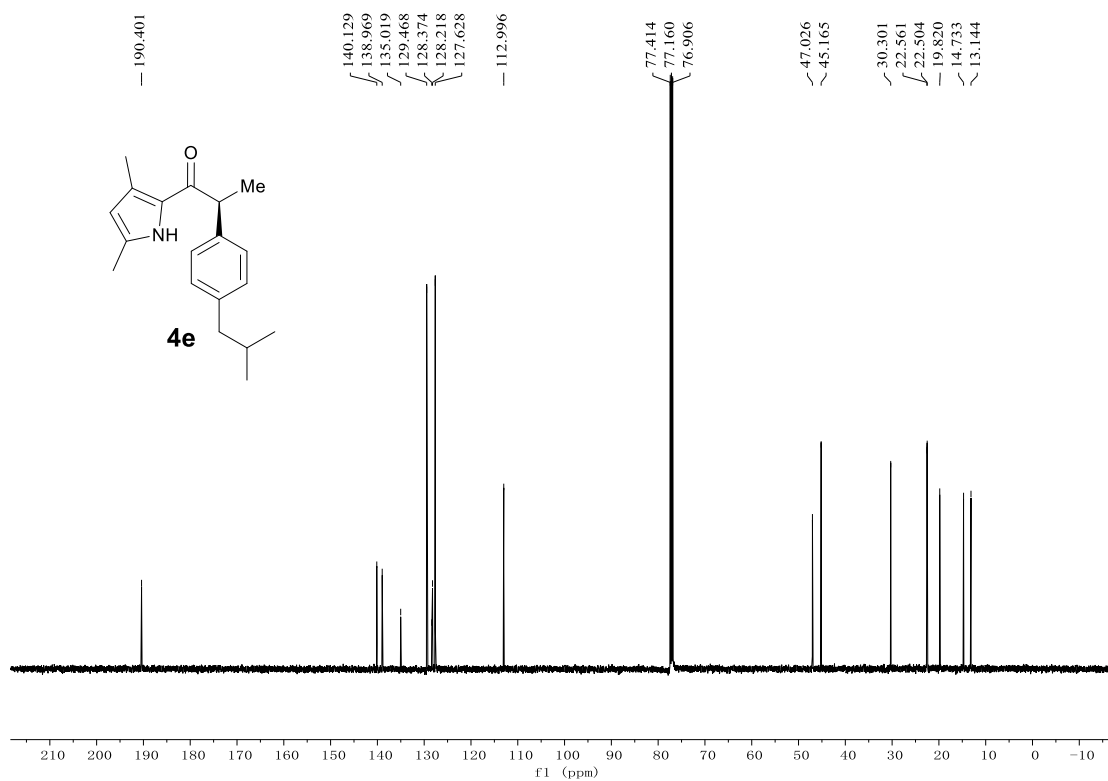

<sup>13</sup>C NMR spectrum (CDCl<sub>3</sub>, 125 MHz) of **4e**



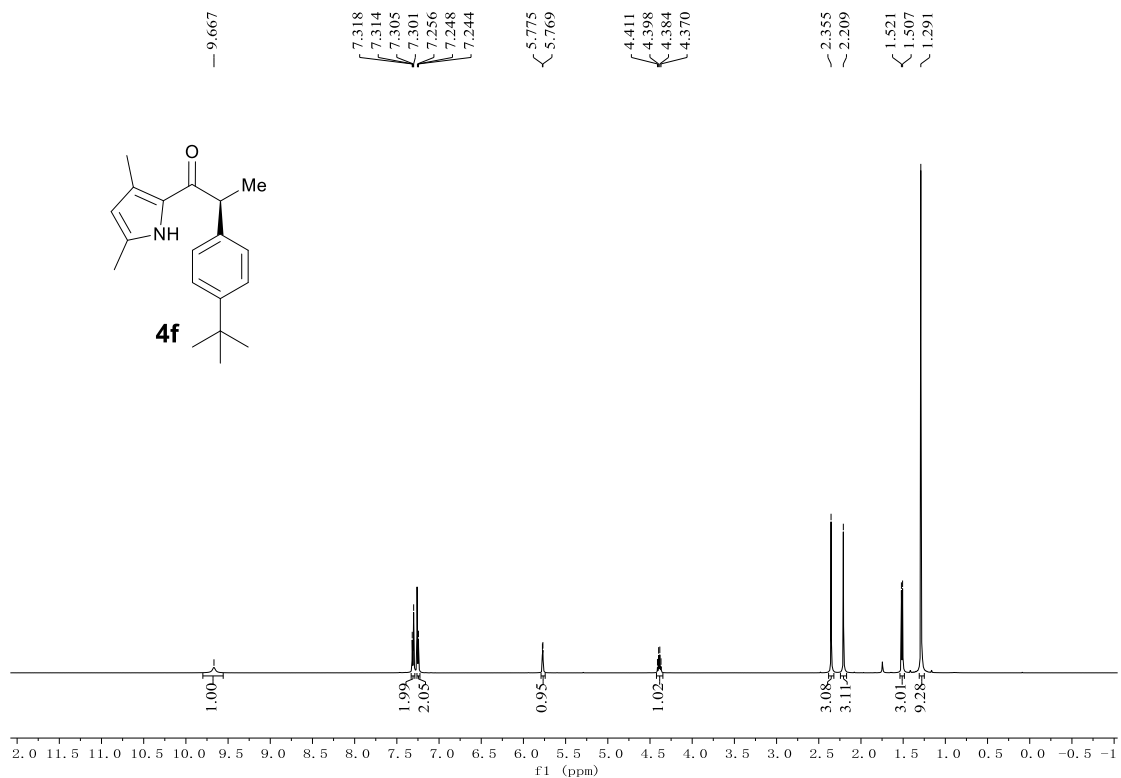

<sup>1</sup>H NMR spectrum (CDCl<sub>3</sub>, 500 MHz) of **4f**

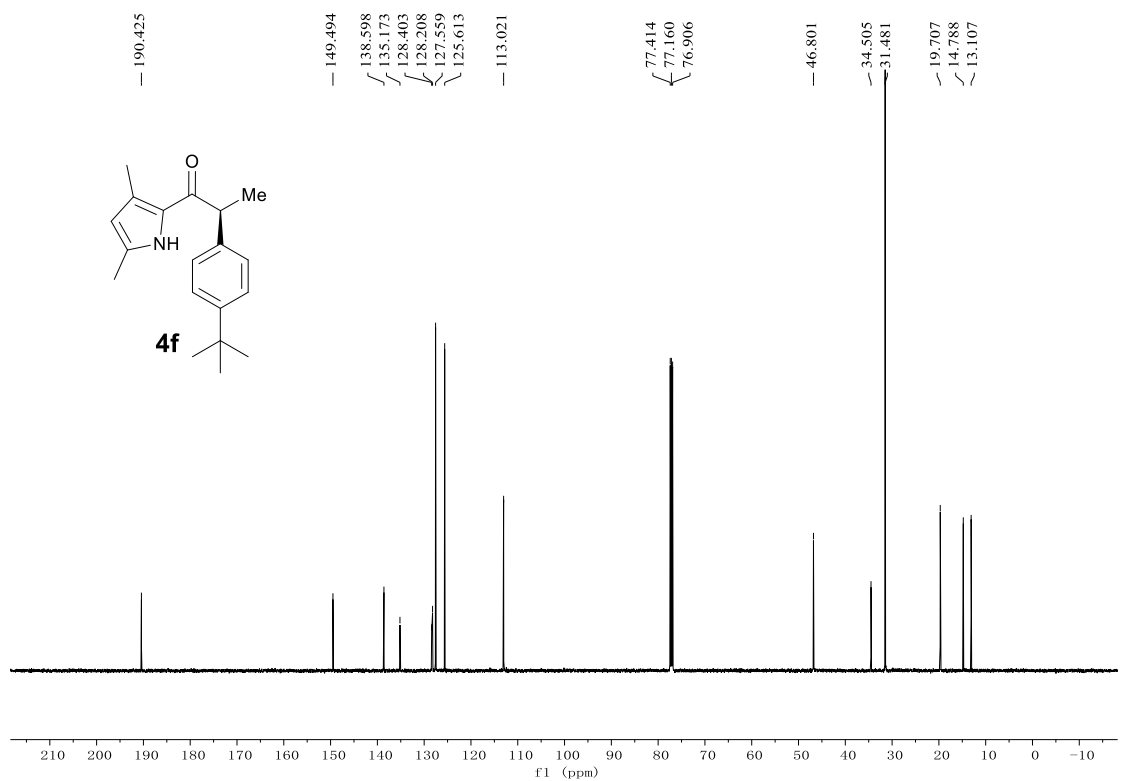

<sup>13</sup>C NMR spectrum (CDCl<sub>3</sub>, 125 MHz) of **4f**

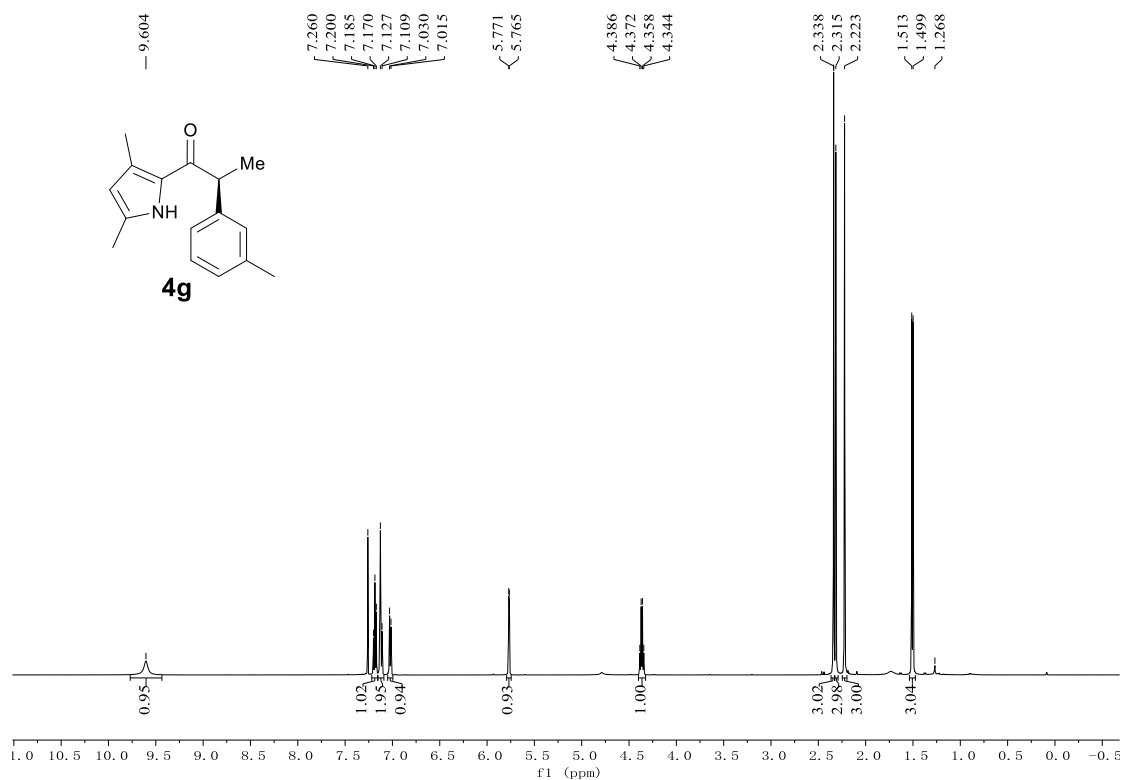

**<sup>1</sup>H NMR spectrum (CDCl<sub>3</sub>, 500 MHz) of **4g****

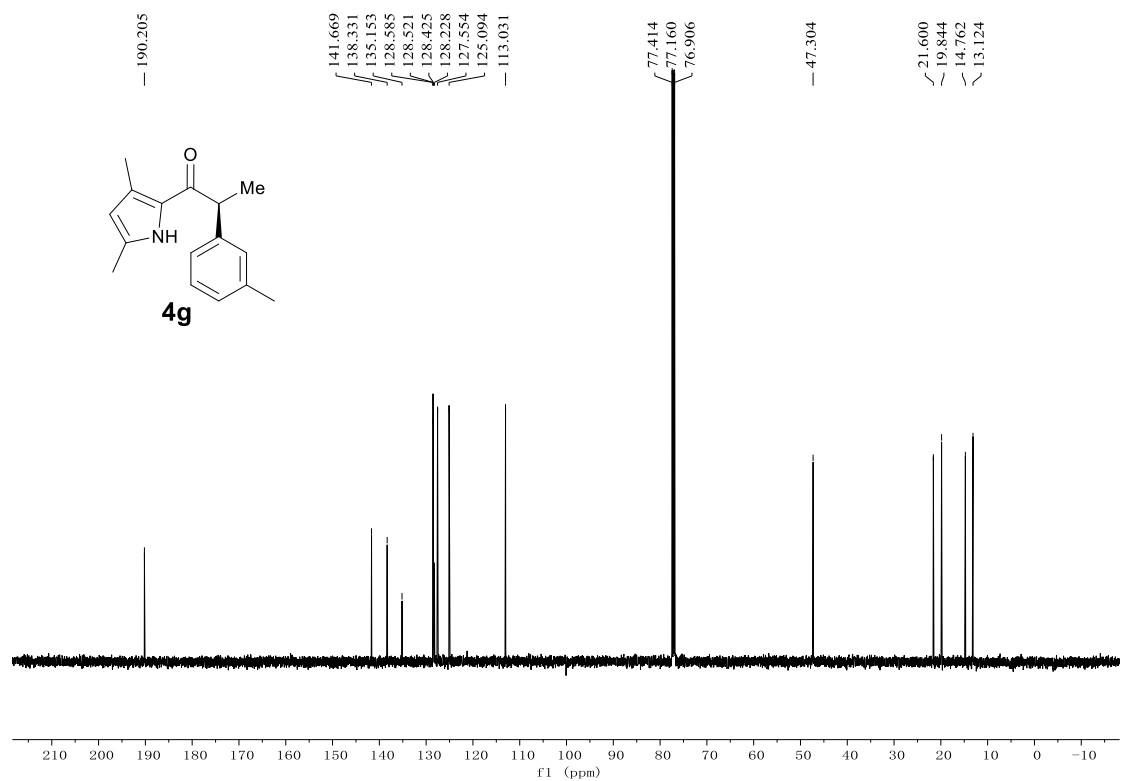

**<sup>13</sup>C NMR spectrum (CDCl<sub>3</sub>, 125 MHz) of **4g****

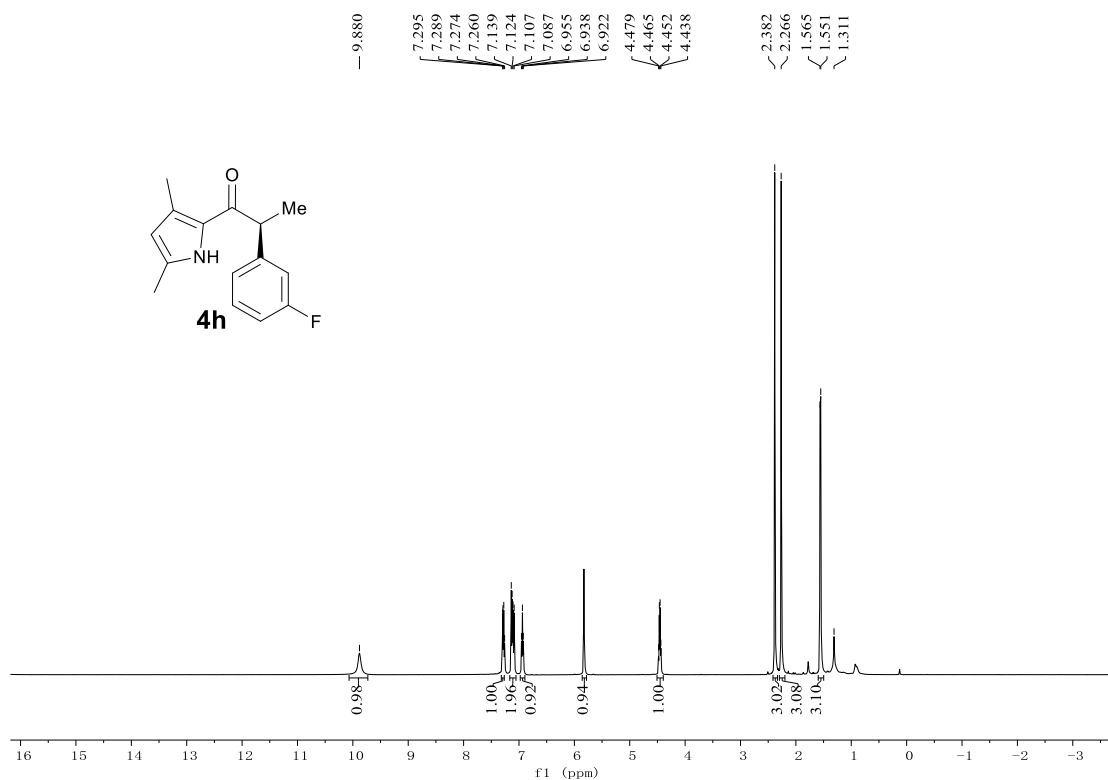

<sup>1</sup>H NMR spectrum (CDCl<sub>3</sub>, 500 MHz) of **4h**

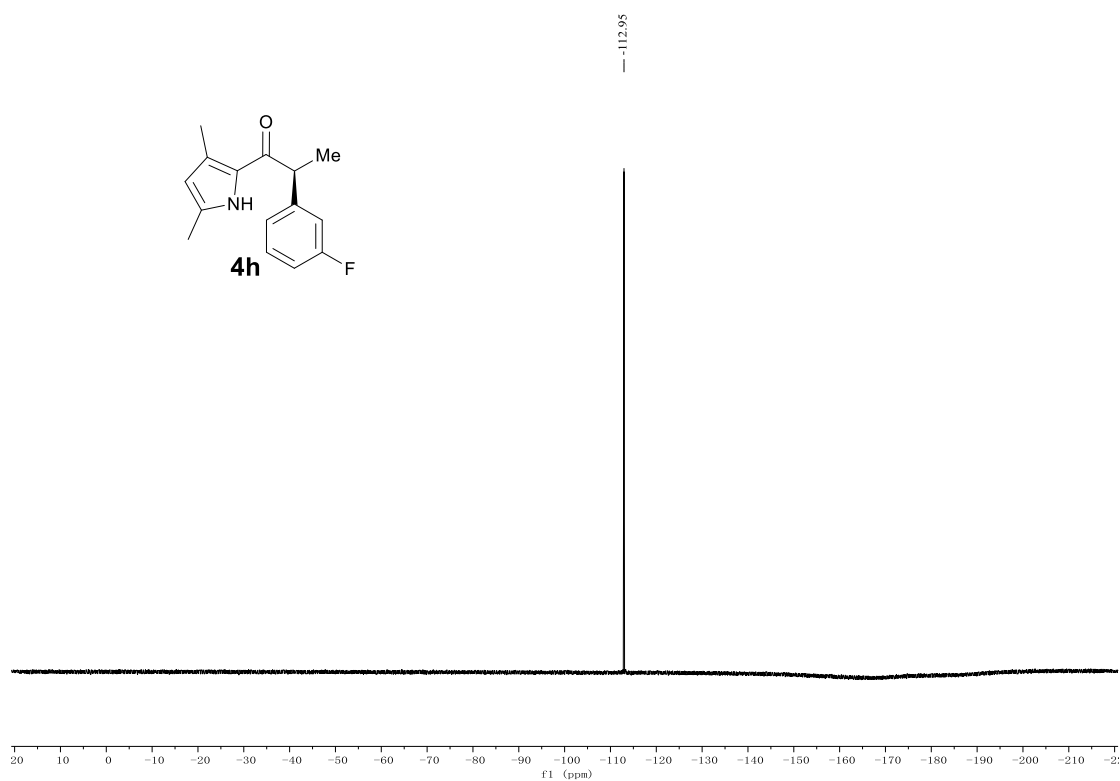

<sup>19</sup>F NMR spectrum (CDCl<sub>3</sub>, 471 MHz) of **4h**

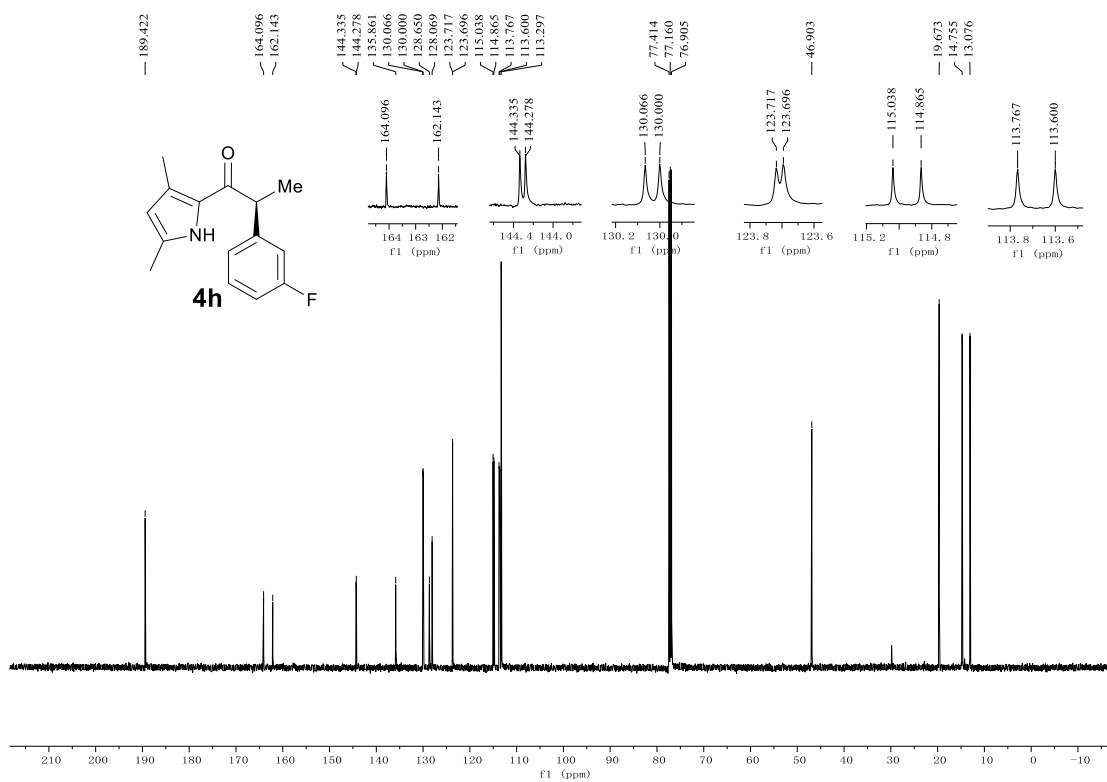

<sup>13</sup>C NMR spectrum (CDCl<sub>3</sub>, 125 MHz) of **4h**

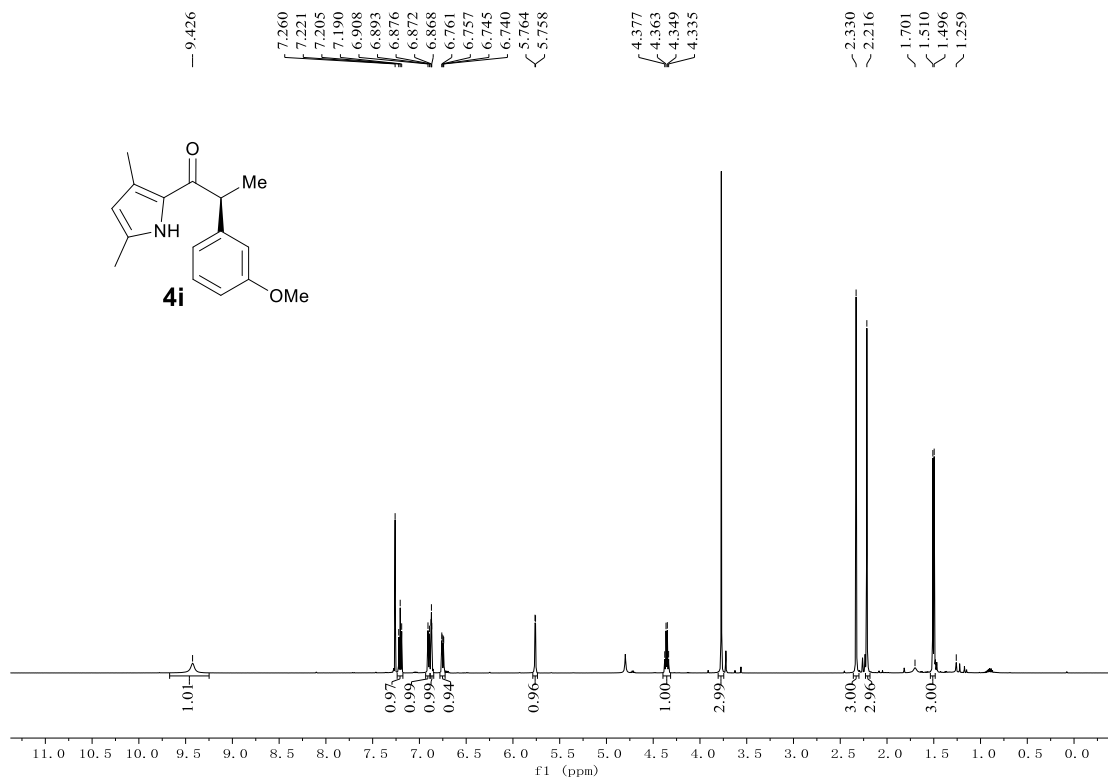

<sup>1</sup>H NMR spectrum (CDCl<sub>3</sub>, 500 MHz) of **4i**

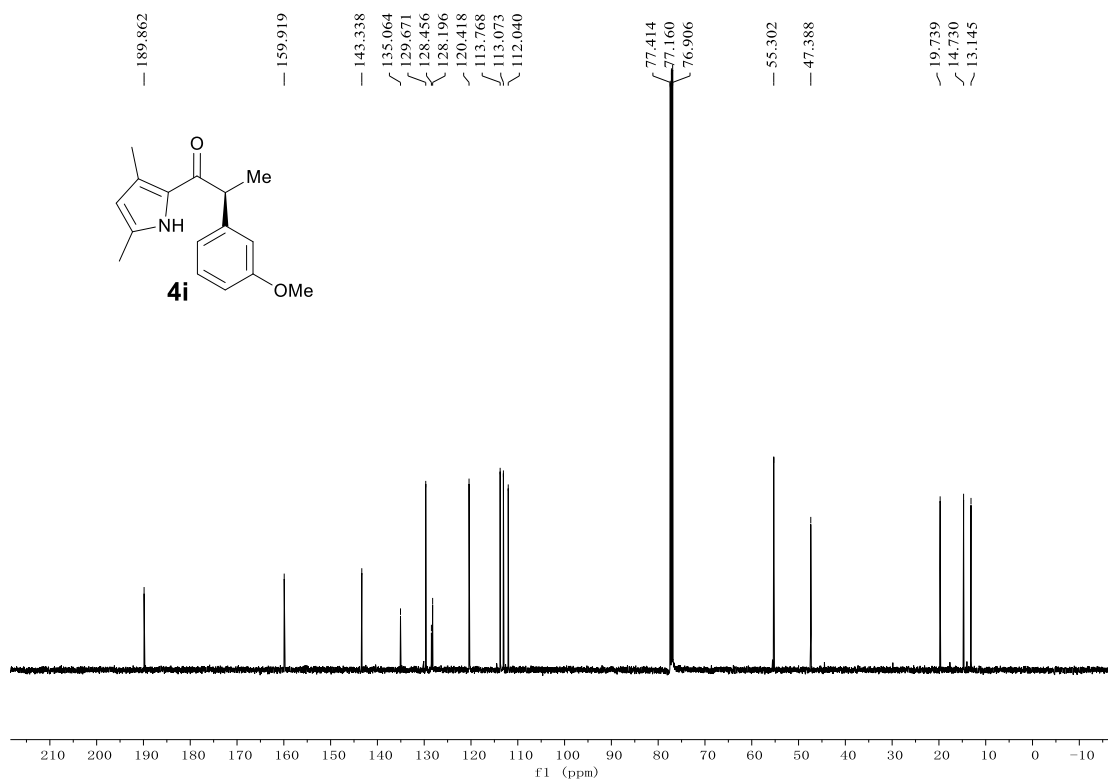

<sup>13</sup>C NMR spectrum (CDCl<sub>3</sub>, 125 MHz) of **4i**

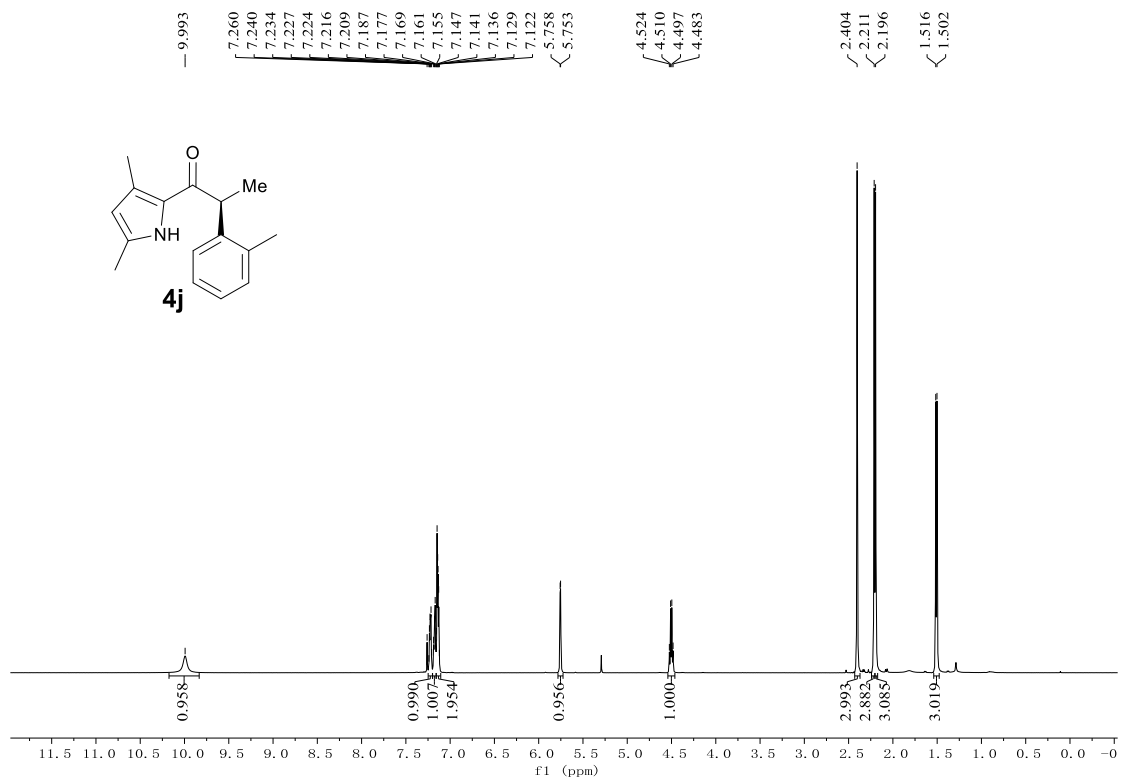

<sup>1</sup>H NMR spectrum (CDCl<sub>3</sub>, 500 MHz) of **4j**

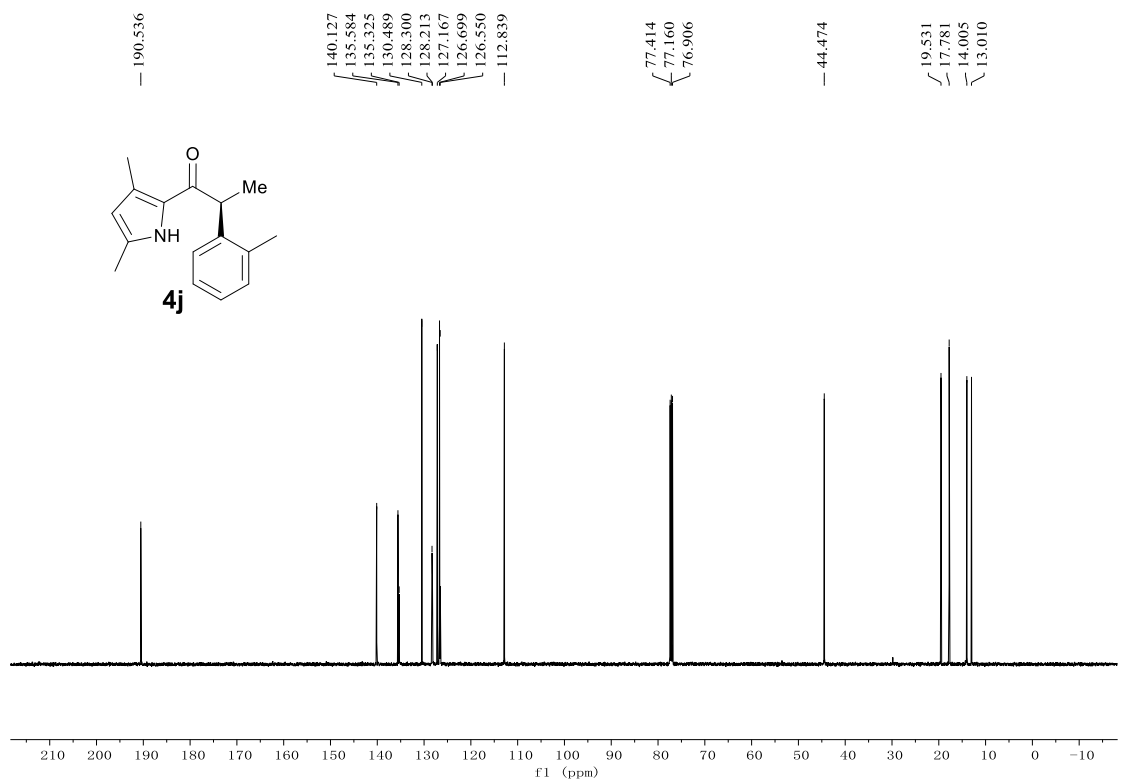

<sup>13</sup>C NMR spectrum (CDCl<sub>3</sub>, 125 MHz) of **4j**

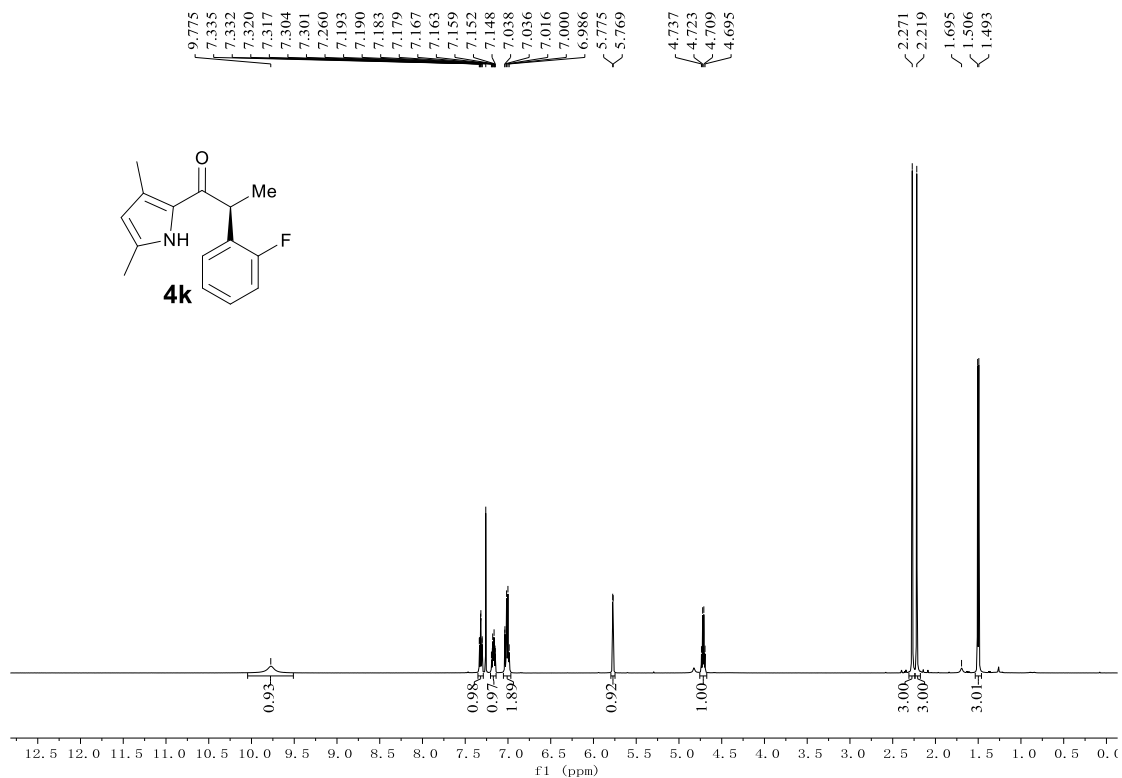

<sup>1</sup>H NMR spectrum (CDCl<sub>3</sub>, 500 MHz) of **4k**

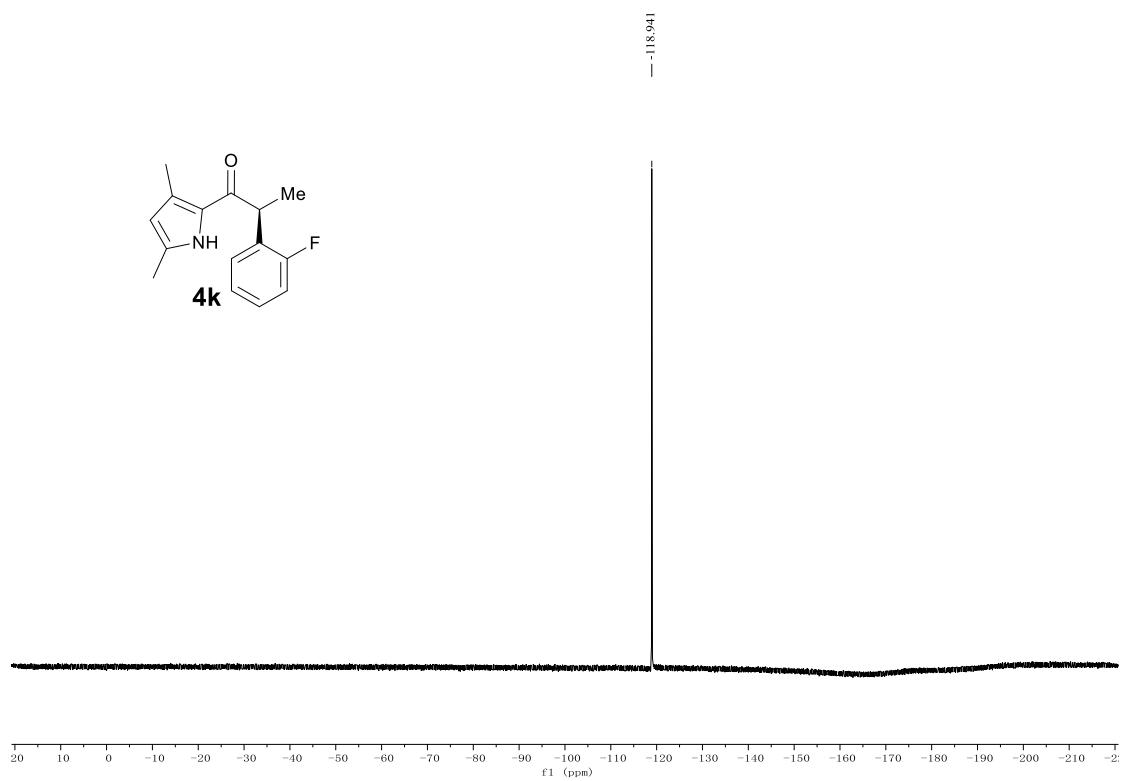

<sup>19</sup>F NMR spectrum (CDCl<sub>3</sub>, 471 MHz) of **4k**

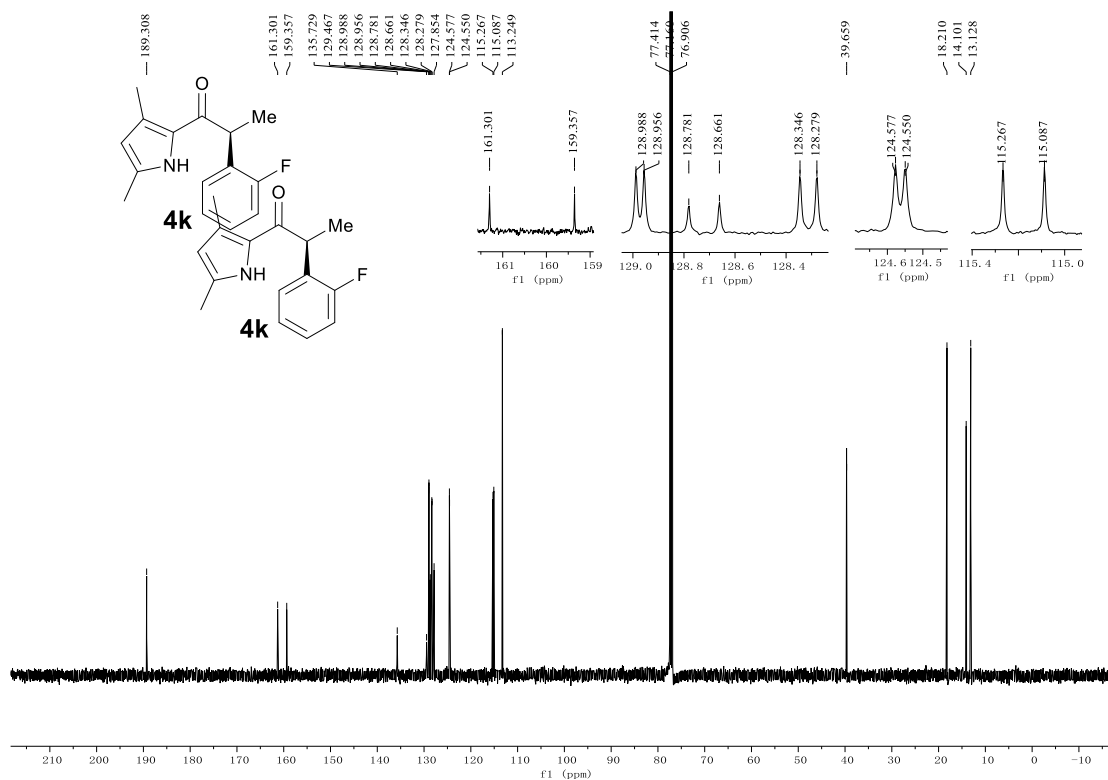

$^{13}\text{C}$  NMR spectrum (CDCl<sub>3</sub>, 125 MHz) of **4k**



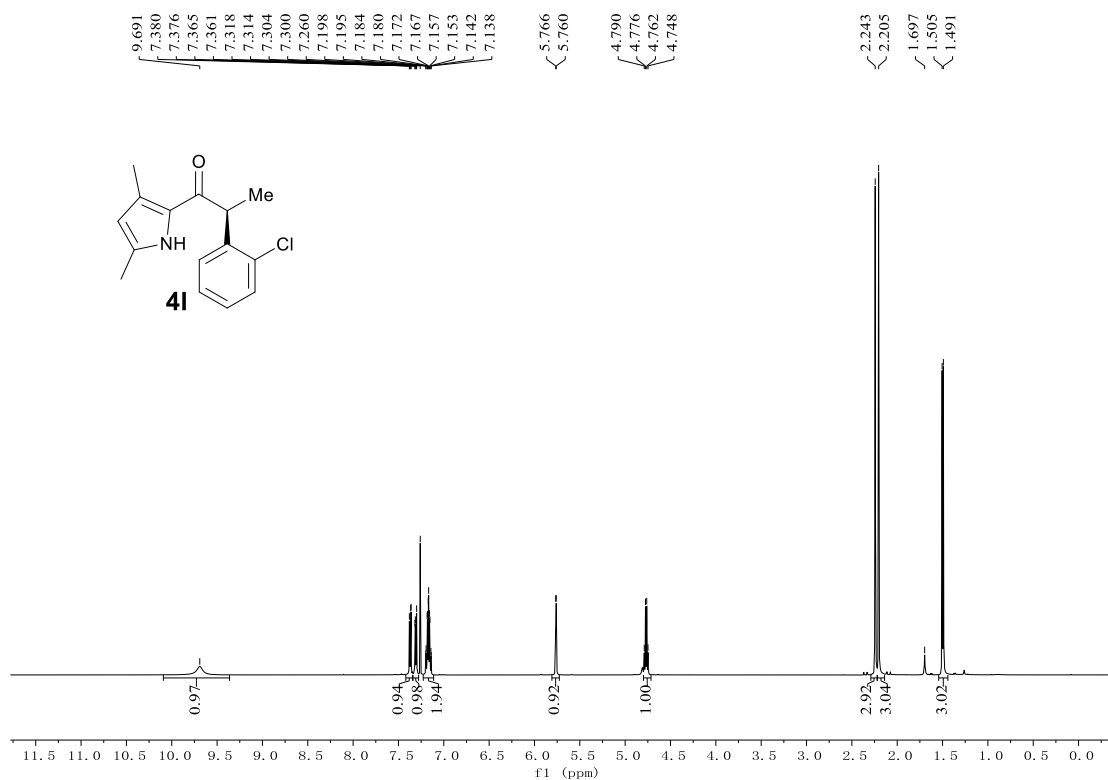

<sup>1</sup>H NMR spectrum (CDCl<sub>3</sub>, 500 MHz) of **4I**

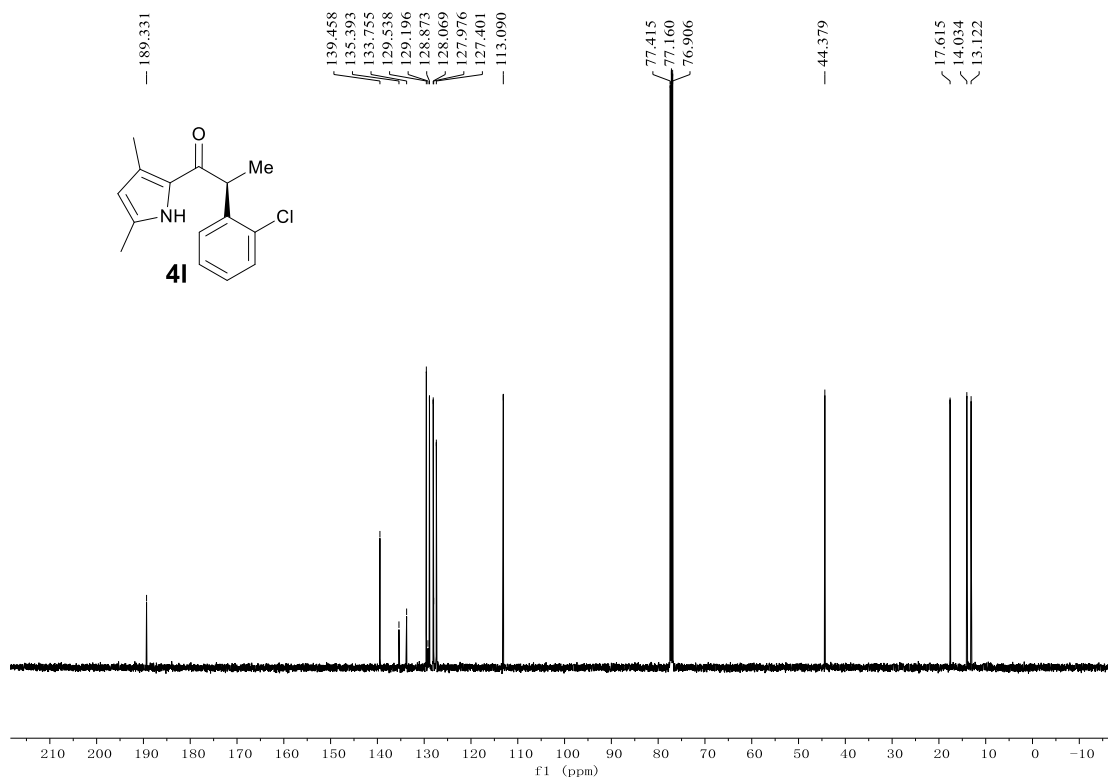

<sup>13</sup>C NMR spectrum (CDCl<sub>3</sub>, 125 MHz) of **4I**

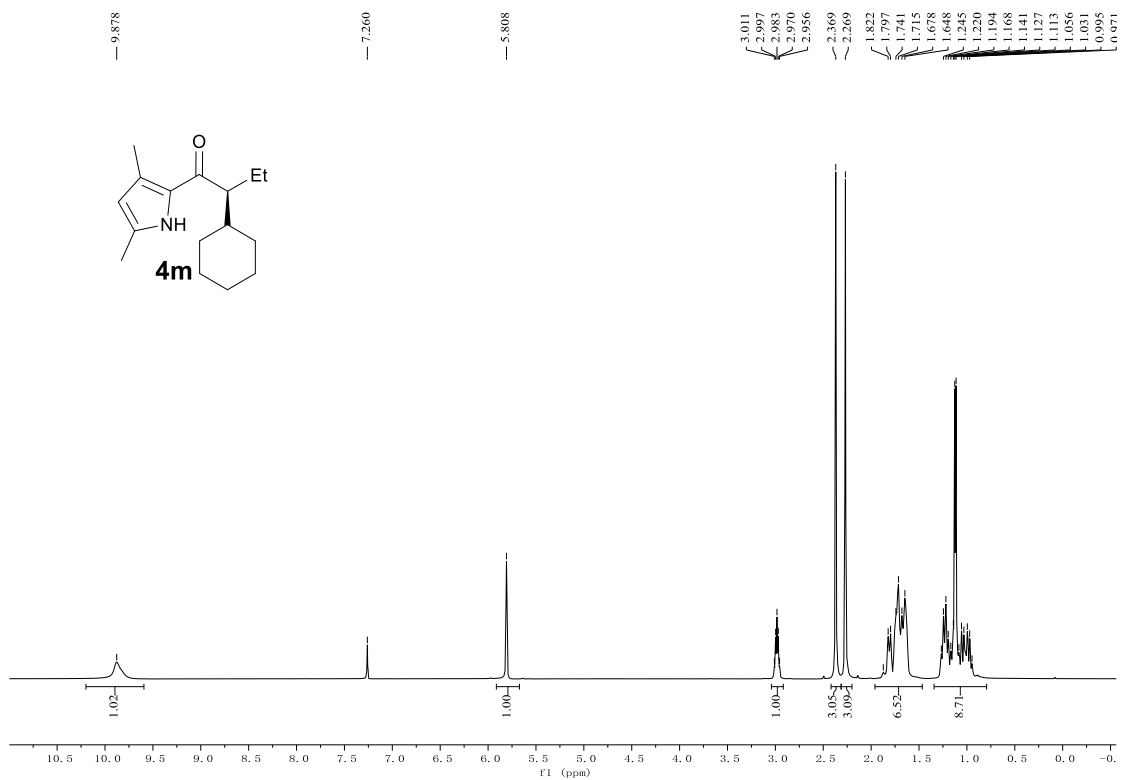

<sup>1</sup>H NMR spectrum (CDCl<sub>3</sub>, 500 MHz) of **4m**

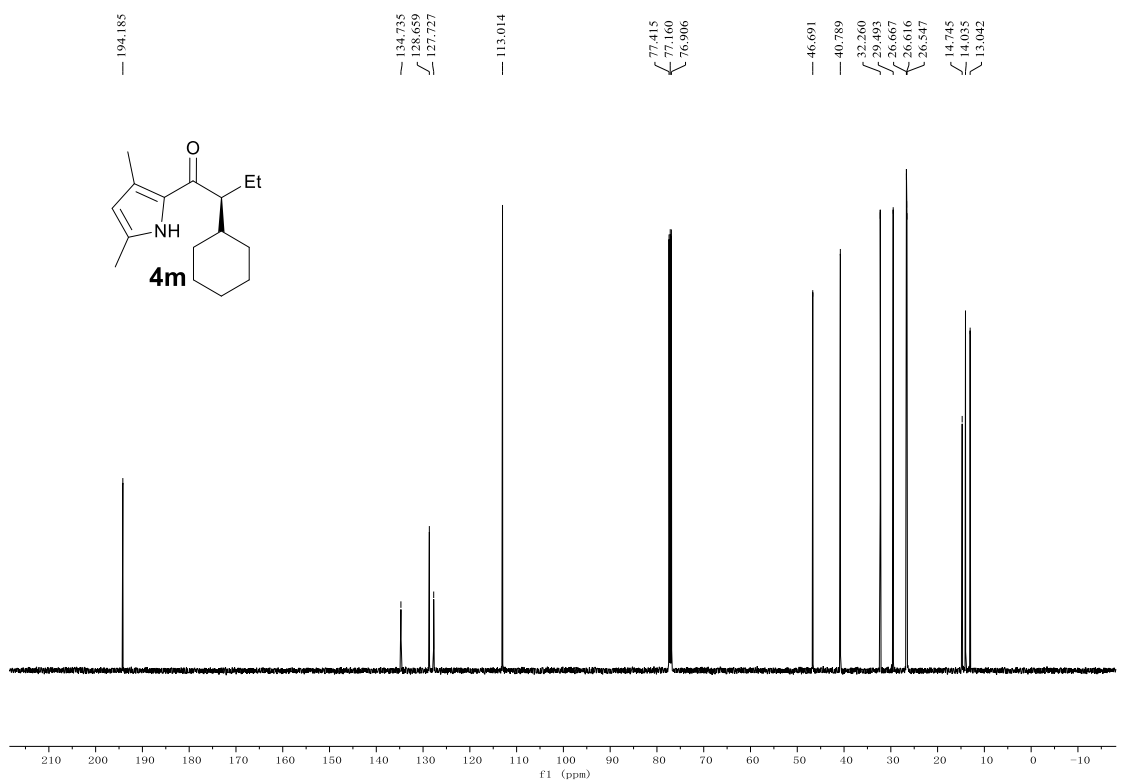

<sup>13</sup>C NMR spectrum (CDCl<sub>3</sub>, 125 MHz) of **4m**

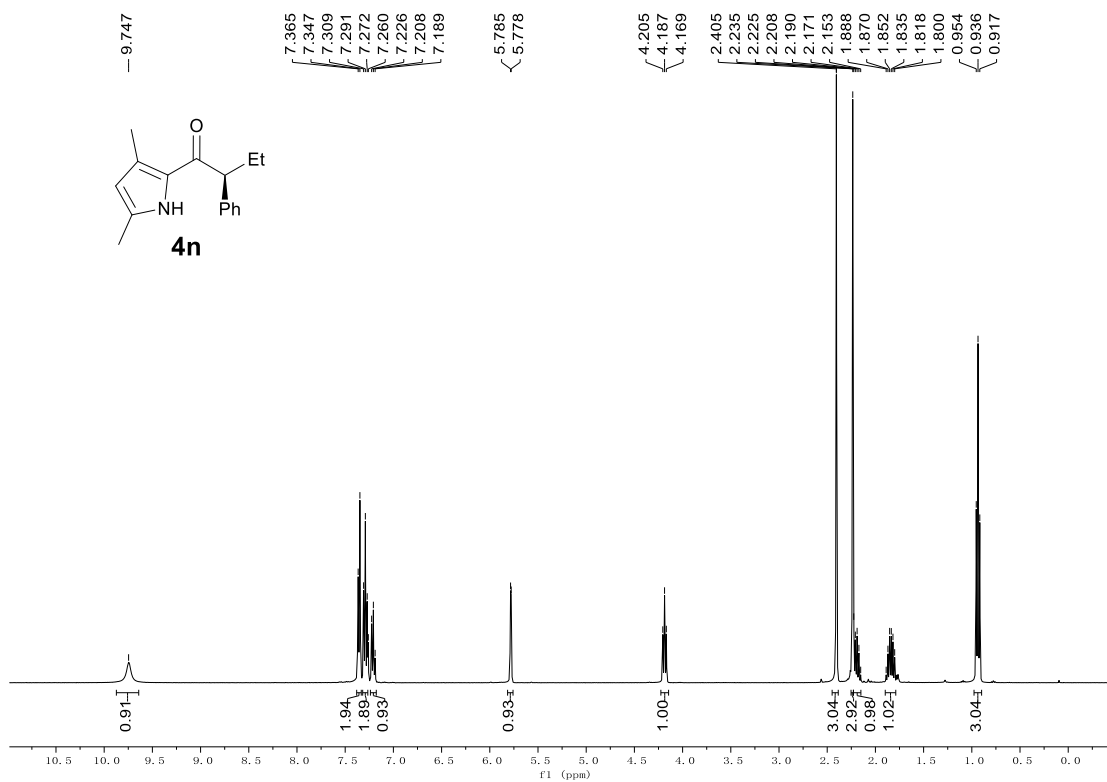

**<sup>1</sup>H NMR spectrum (CDCl<sub>3</sub>, 400 MHz) of **4n****

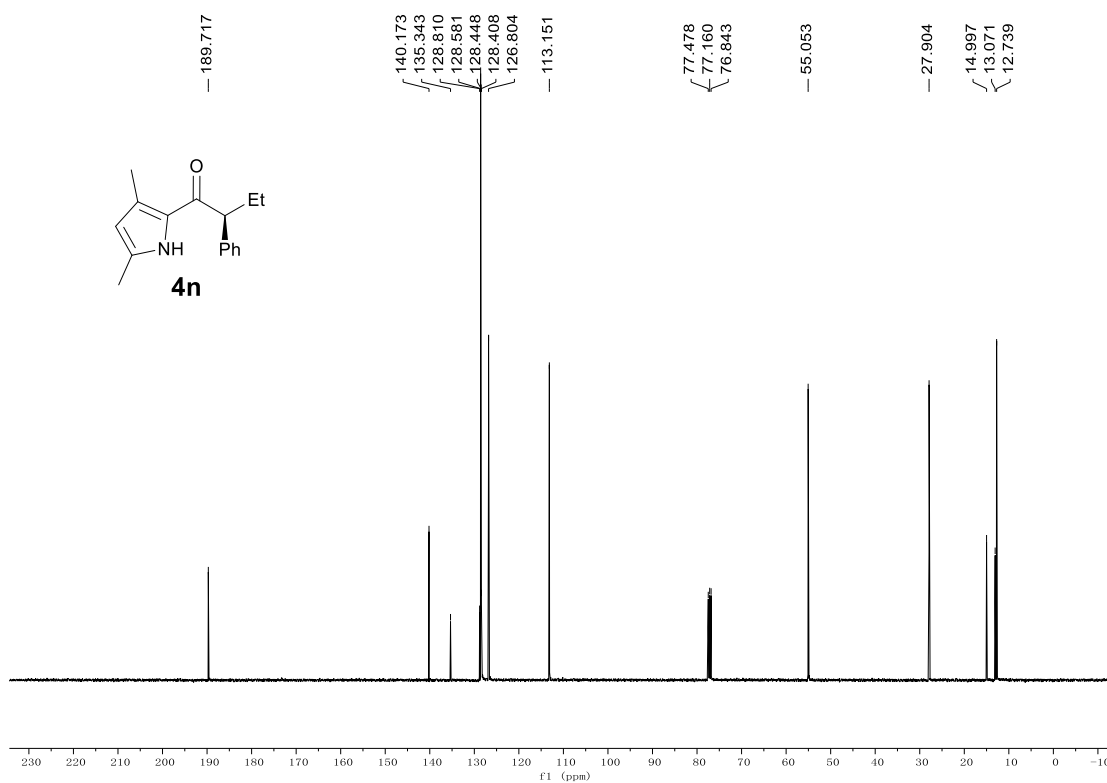

**<sup>13</sup>C NMR spectrum (CDCl<sub>3</sub>, 100 MHz) of **4n****

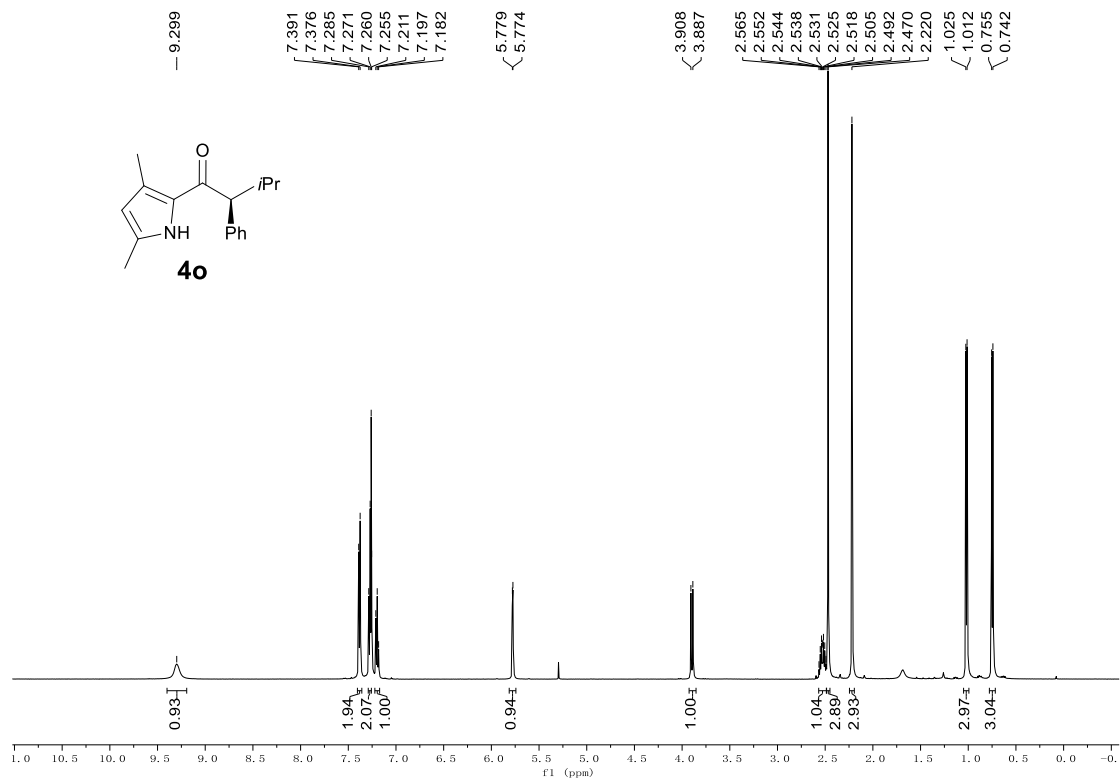

**<sup>1</sup>H NMR spectrum (CDCl<sub>3</sub>, 500 MHz) of **4o****

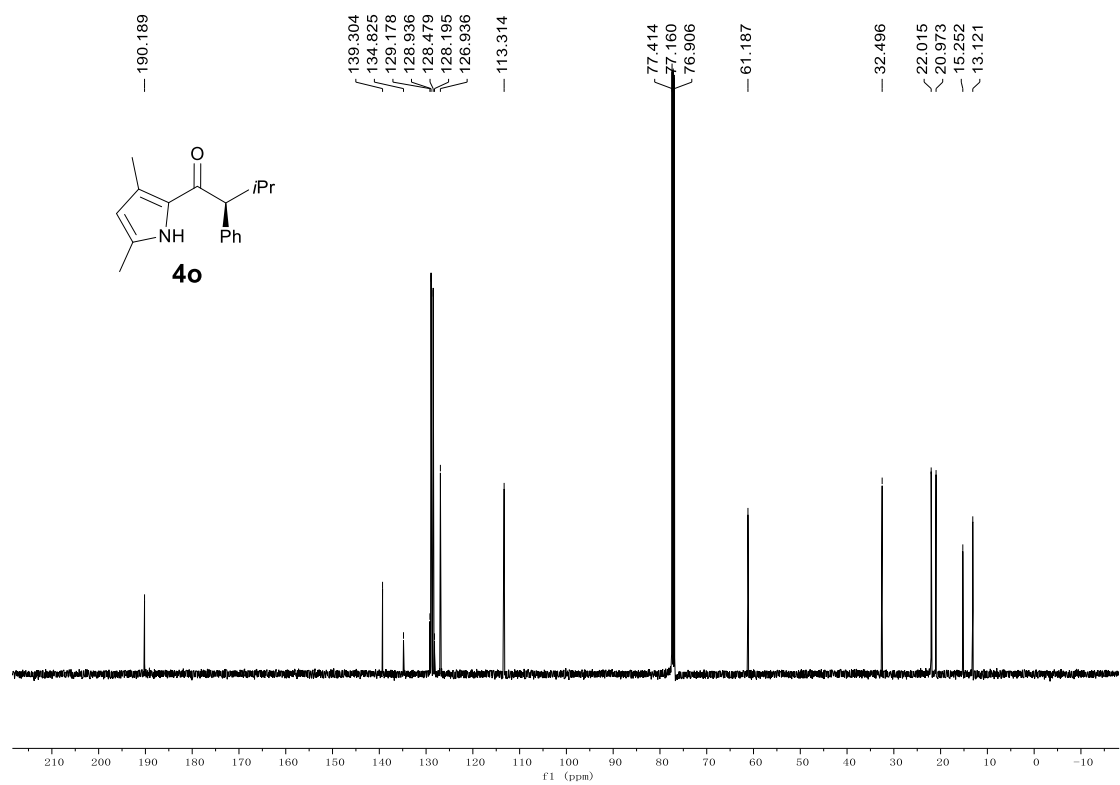

**<sup>13</sup>C NMR spectrum (CDCl<sub>3</sub>, 125 MHz) of **4o****

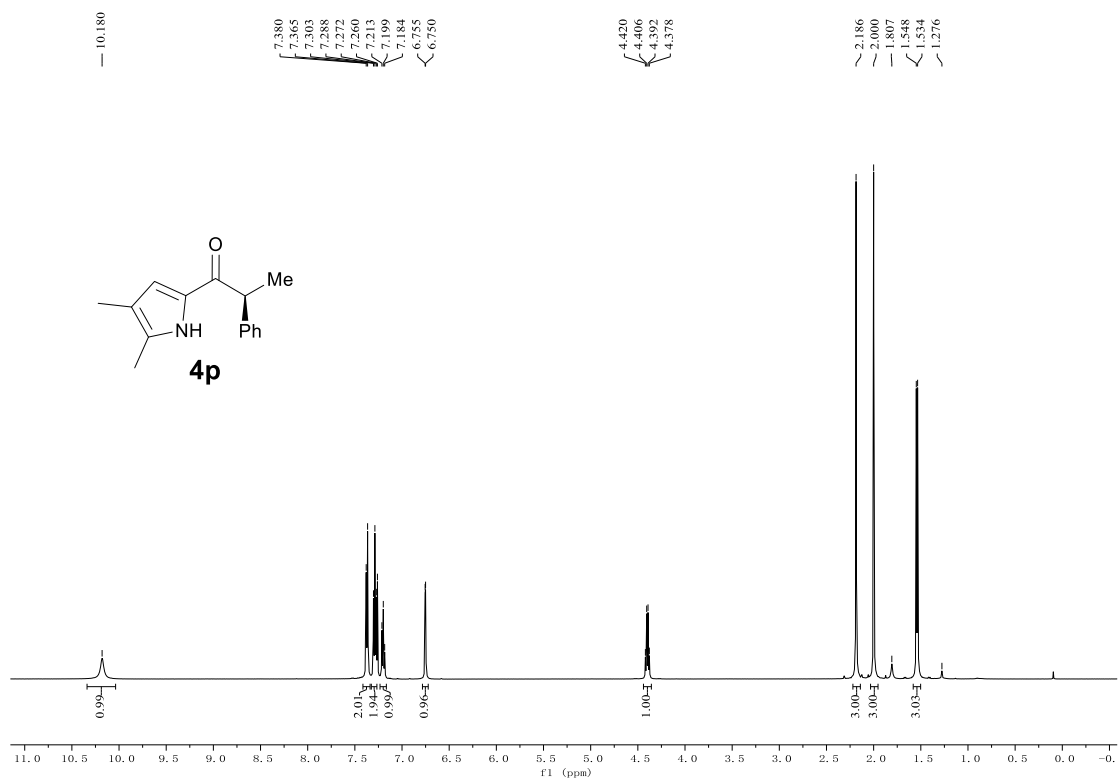

<sup>1</sup>H NMR spectrum (CDCl<sub>3</sub>, 500 MHz) of **4p**

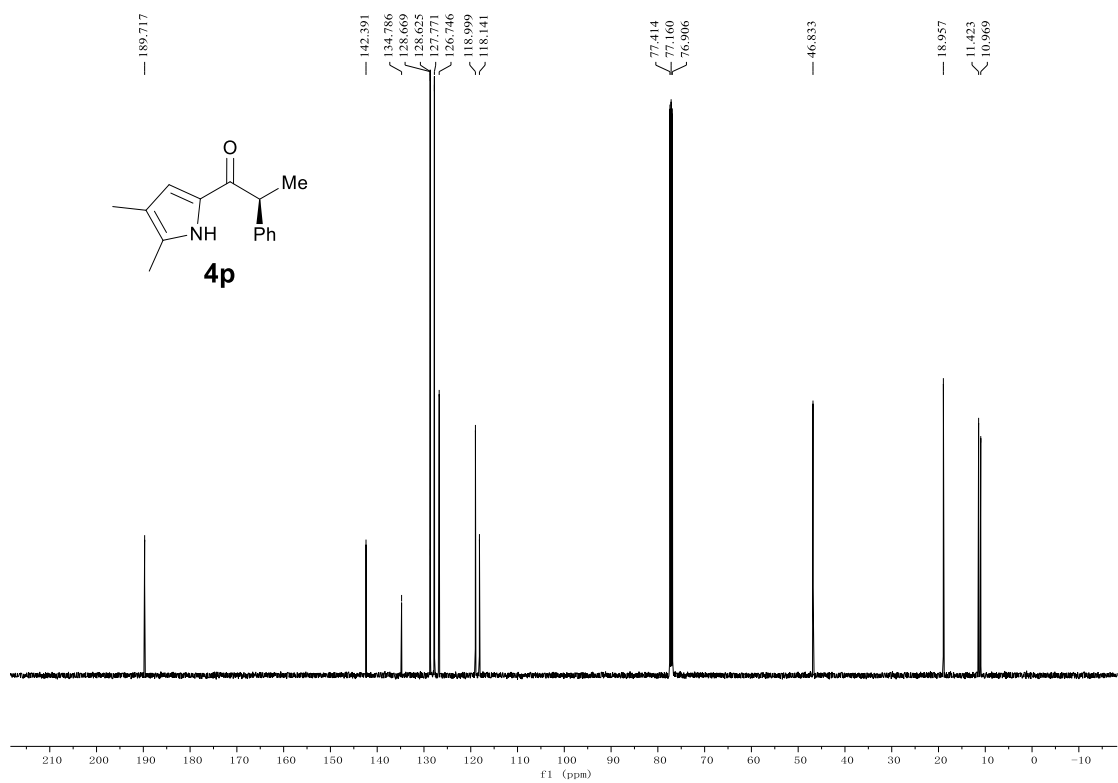

<sup>13</sup>C NMR spectrum (CDCl<sub>3</sub>, 125 MHz) of **4p**

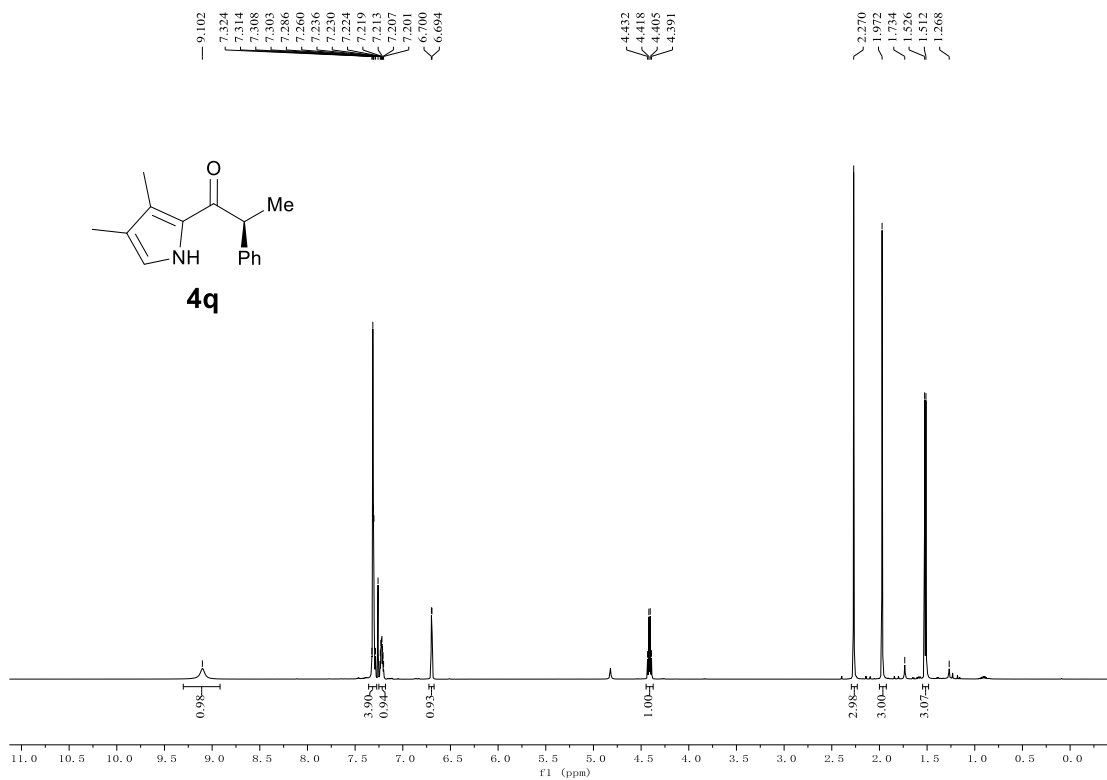

<sup>13</sup>C NMR spectrum (CDCl<sub>3</sub>, 125 MHz) of **4q**

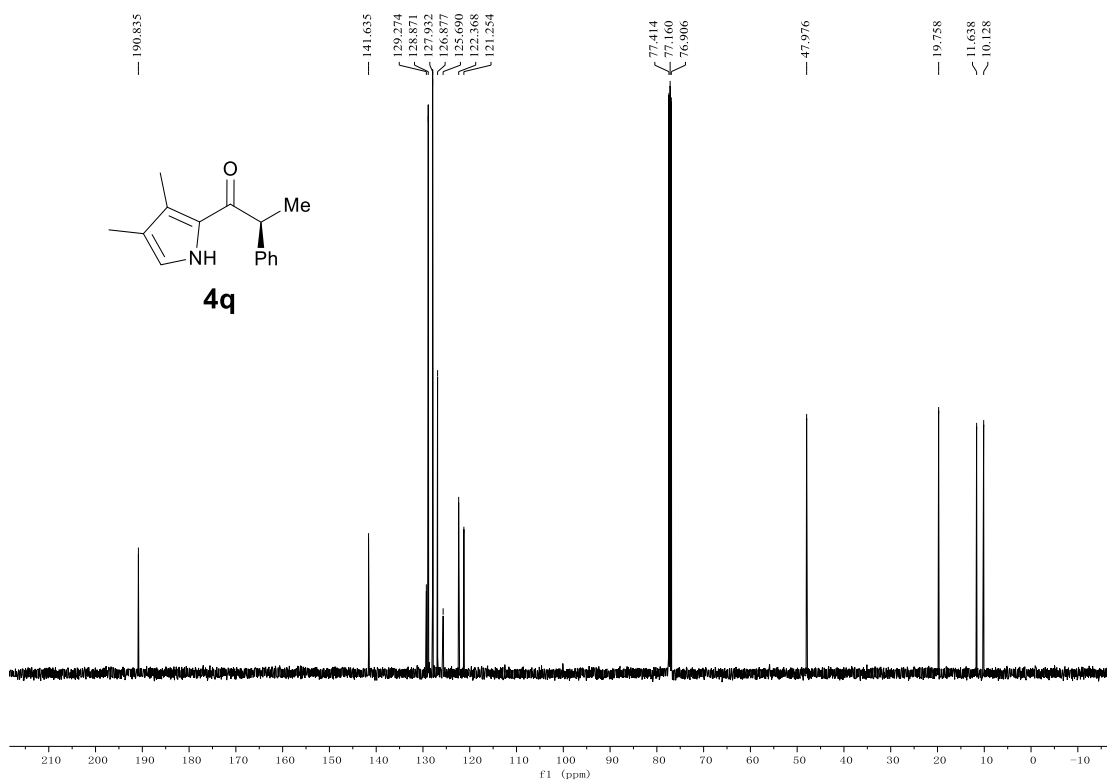

<sup>1</sup>H NMR spectrum (CDCl<sub>3</sub>, 500 MHz) of **4q**

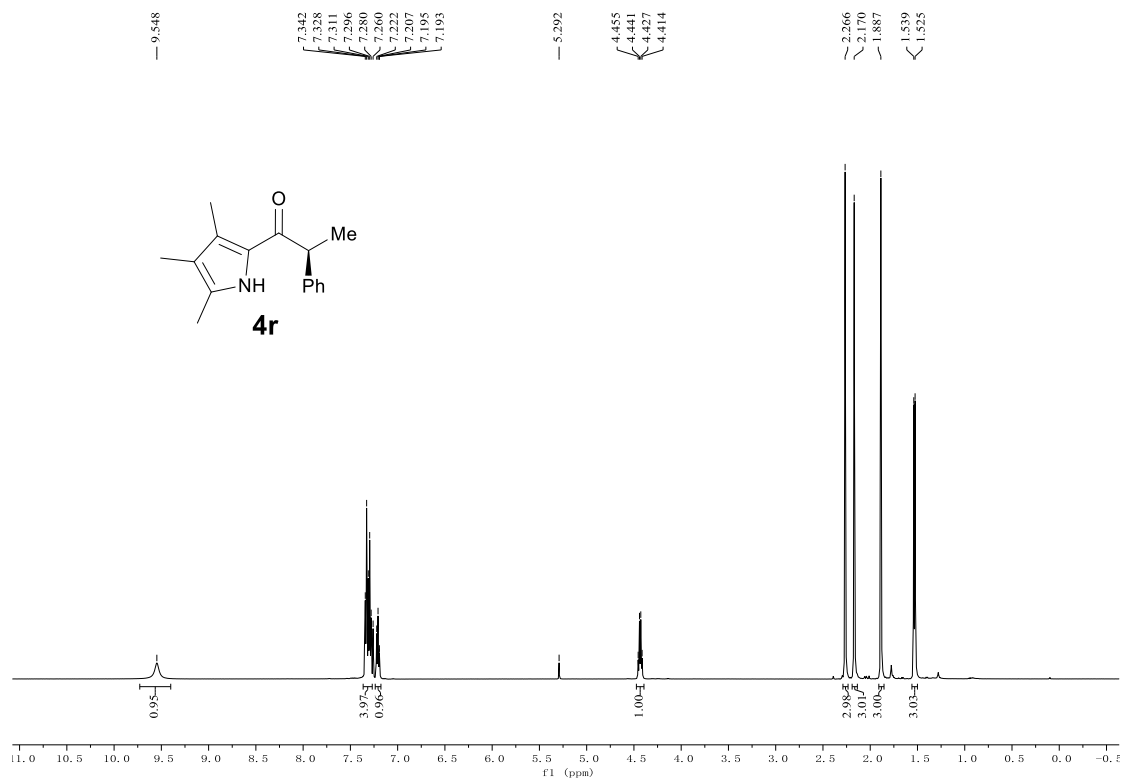

<sup>1</sup>H NMR spectrum (CDCl<sub>3</sub>, 500 MHz) of **4r**

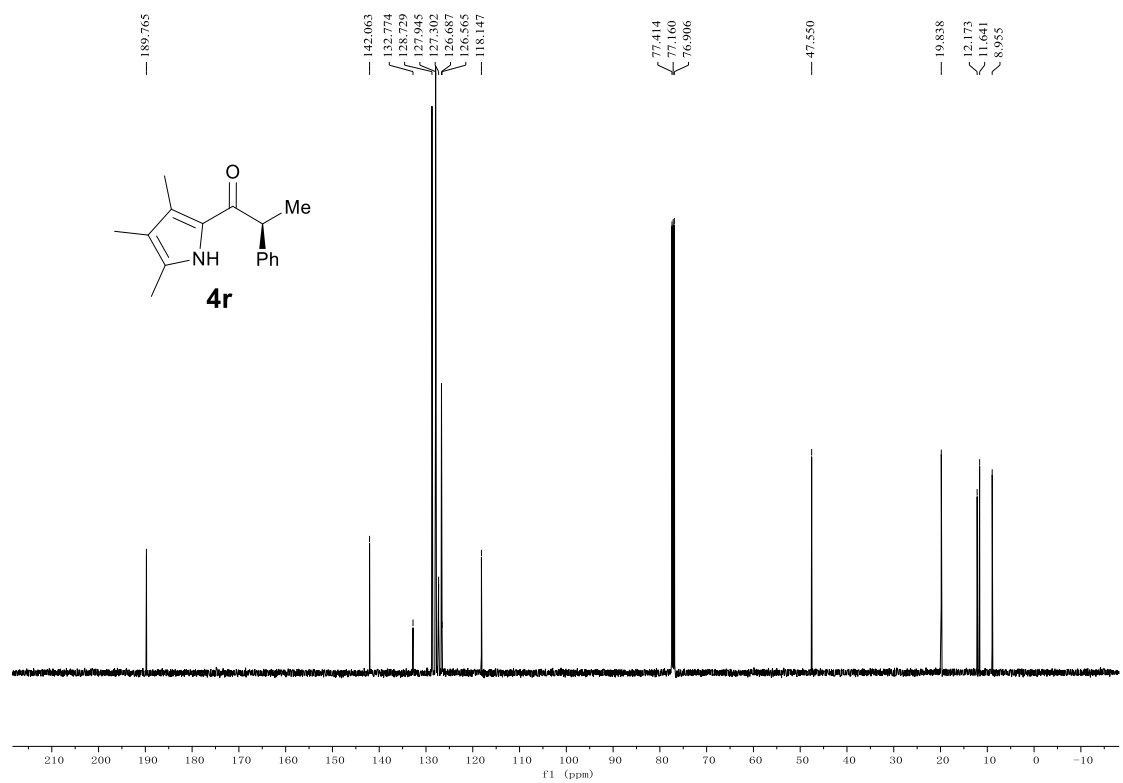

<sup>13</sup>C NMR spectrum (CDCl<sub>3</sub>, 125 MHz) of **4r**

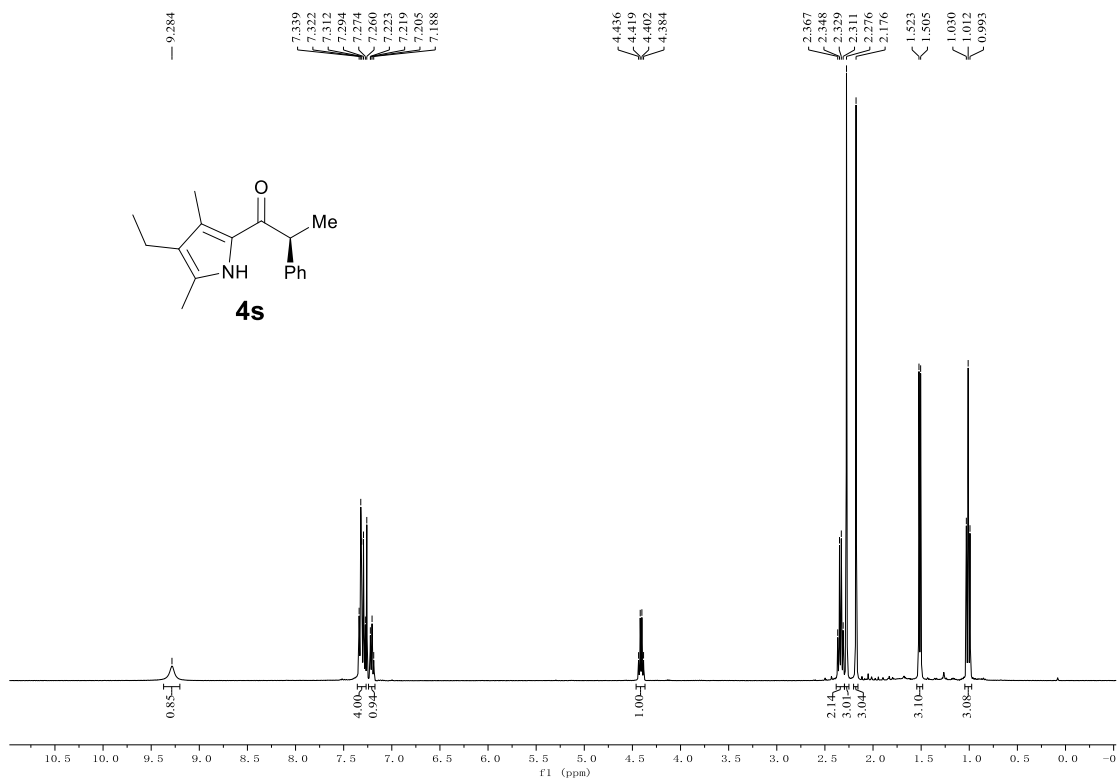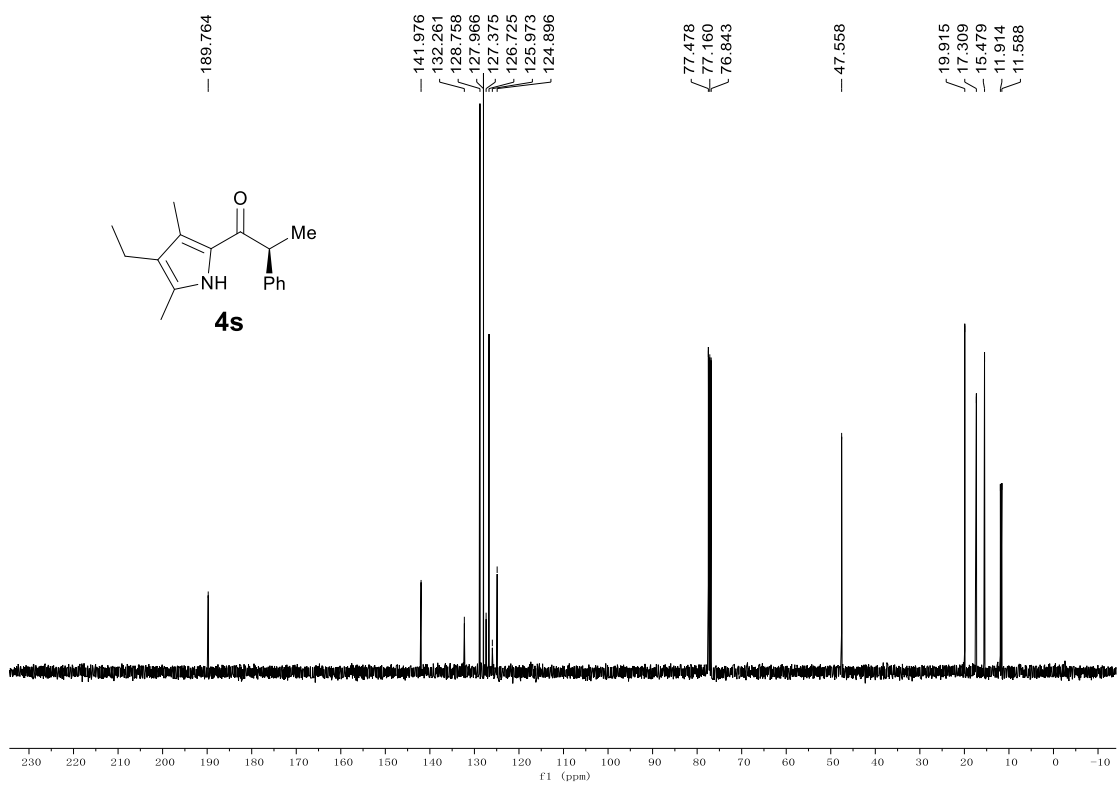



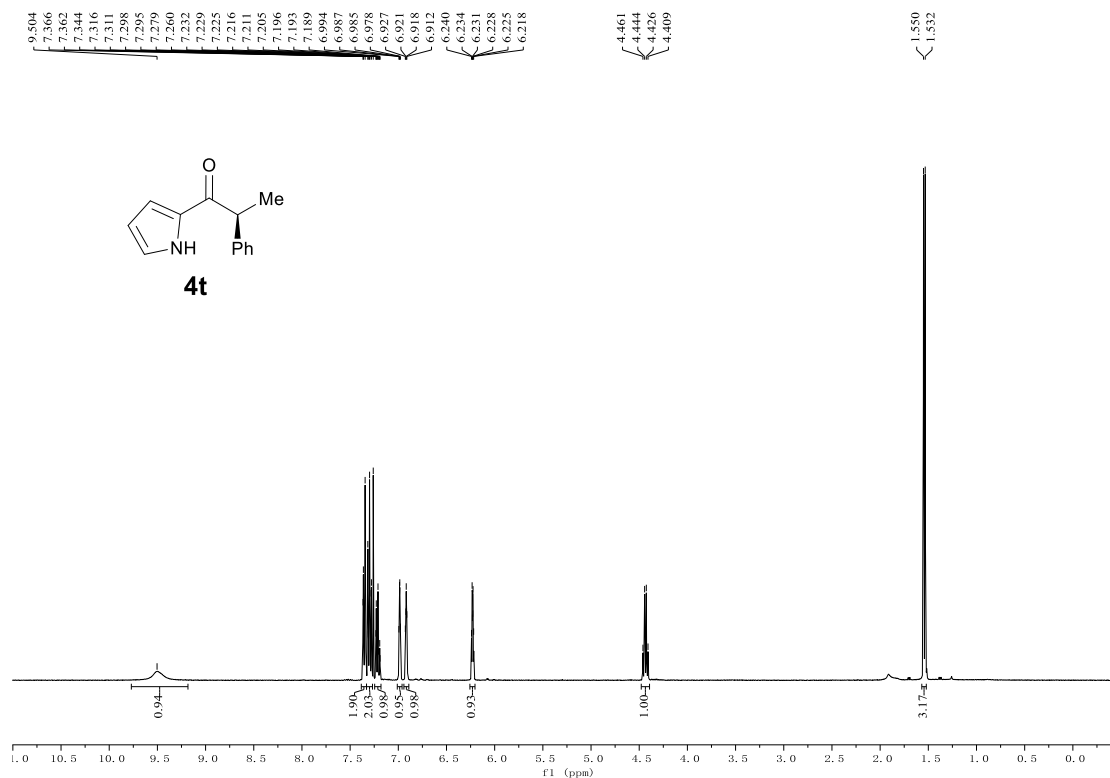

<sup>1</sup>H NMR spectrum (CDCl<sub>3</sub>, 400 MHz) of **4t**

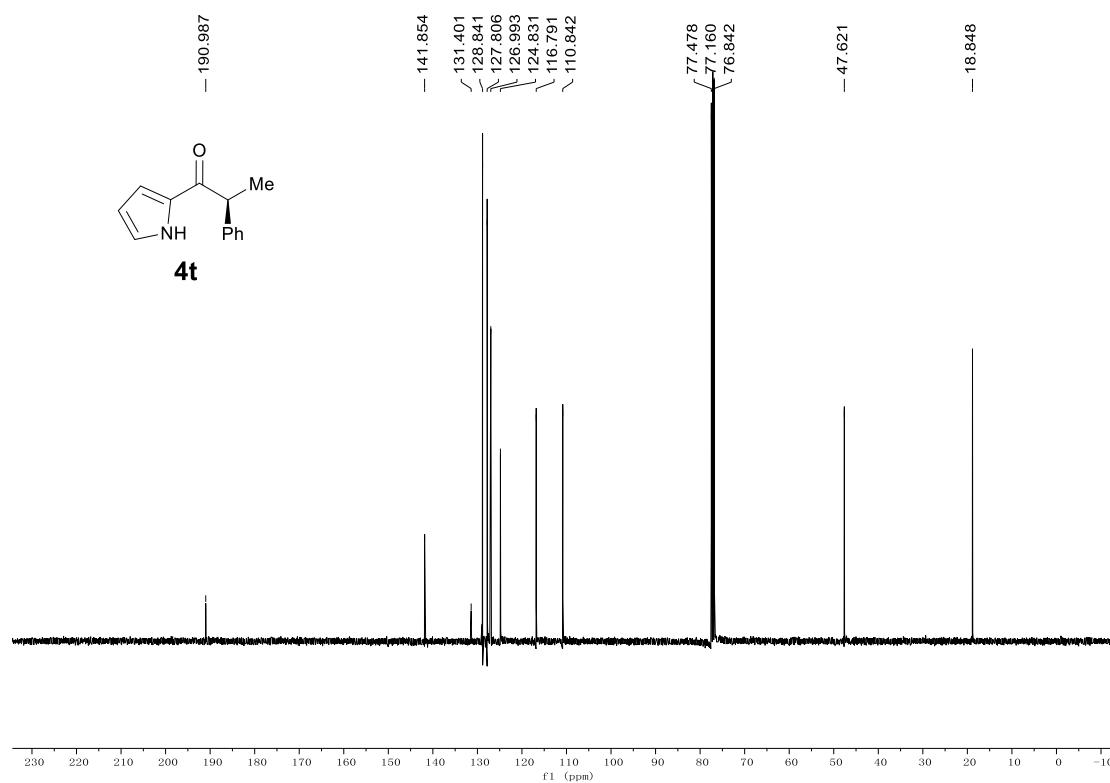

<sup>13</sup>C NMR spectrum (CDCl<sub>3</sub>, 100 MHz) of **4t**

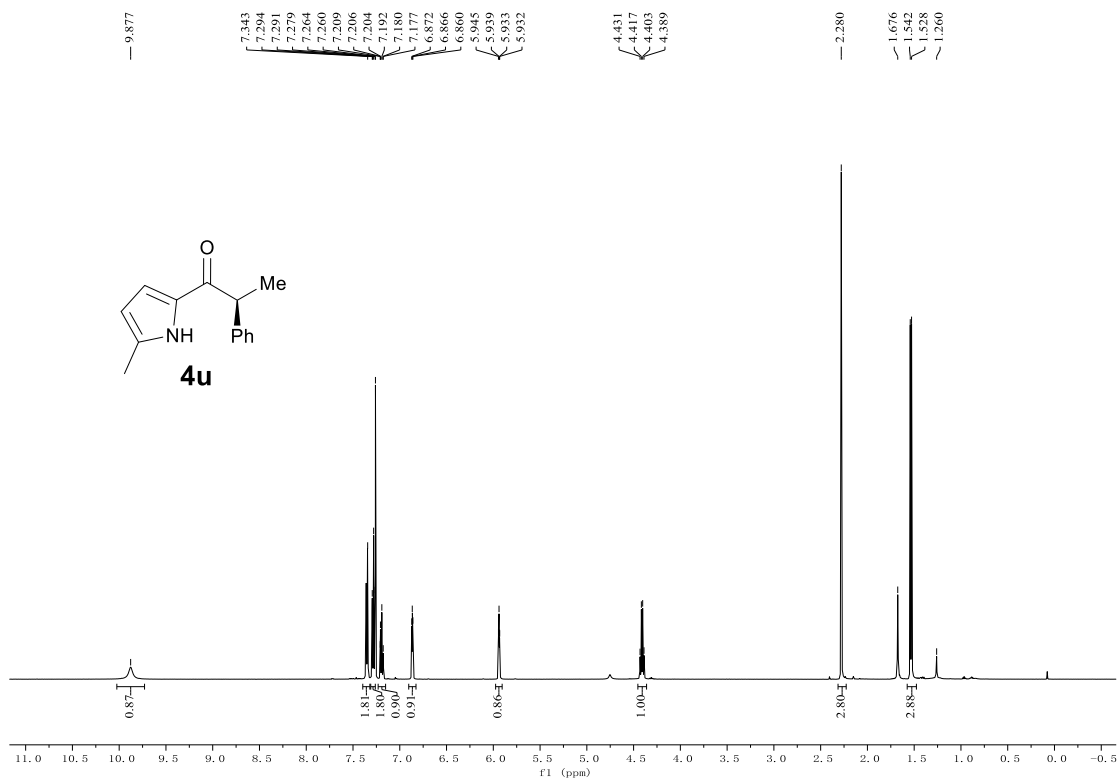

<sup>1</sup>H NMR spectrum (CDCl<sub>3</sub>, 500 MHz) of **4u**

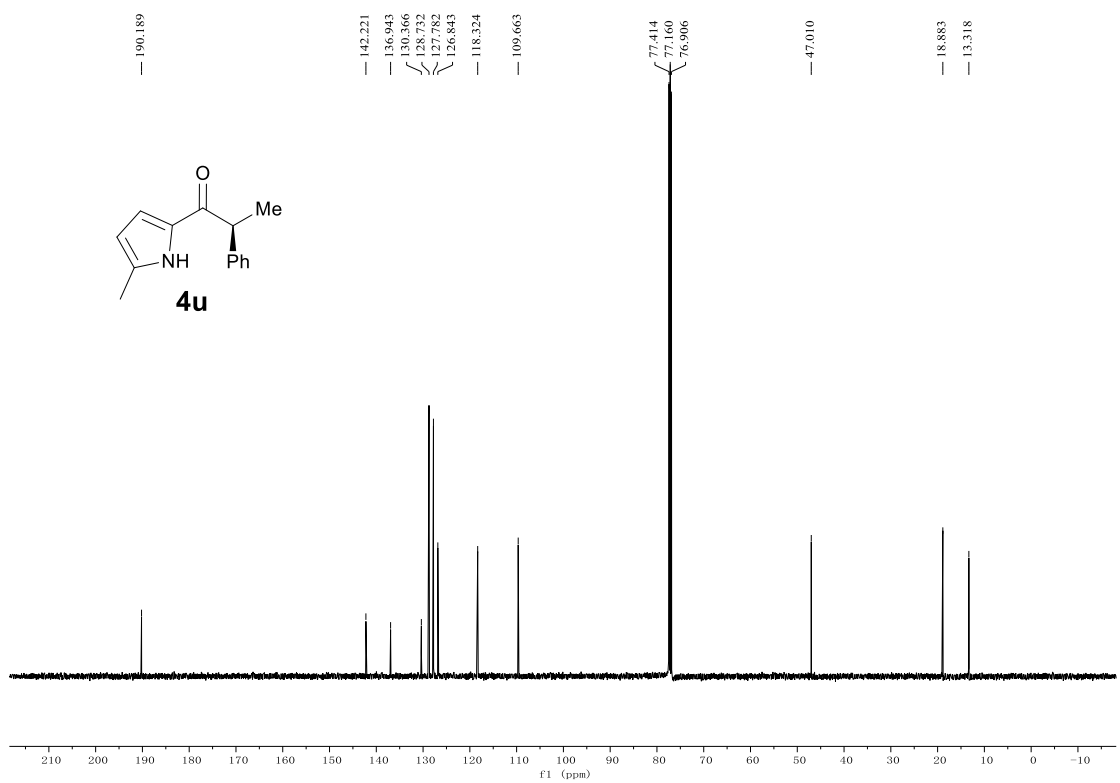

<sup>13</sup>C NMR spectrum (CDCl<sub>3</sub>, 125 MHz) of **4u**

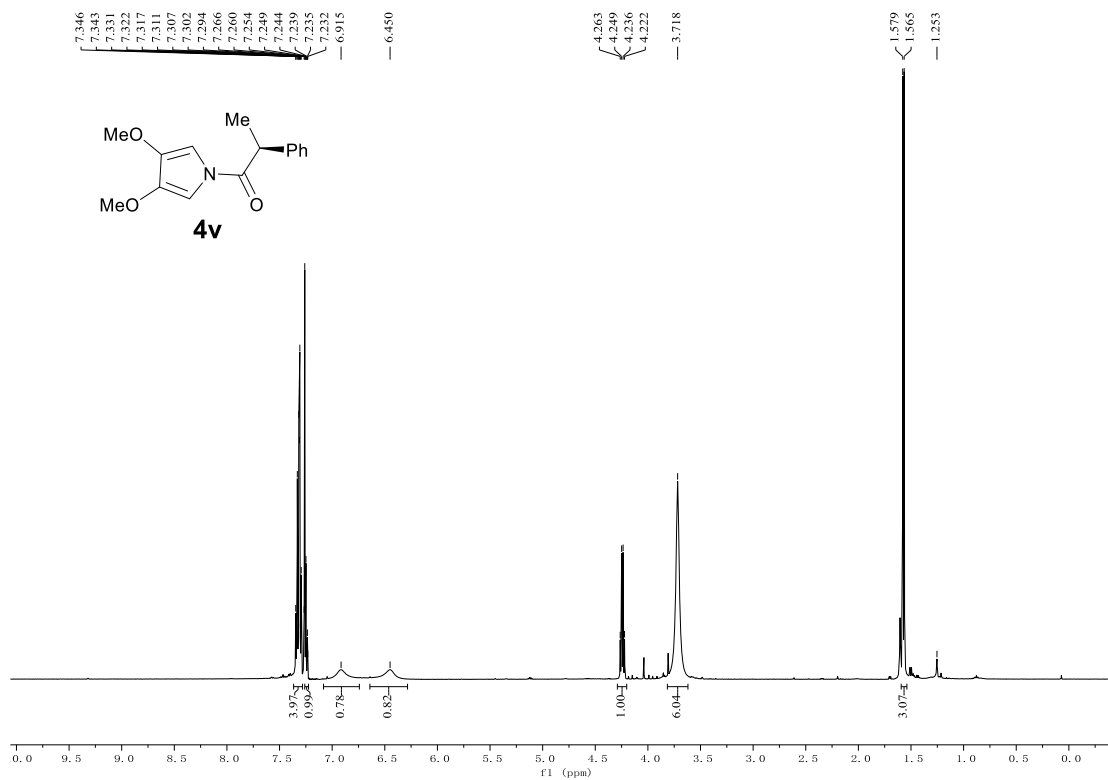

<sup>1</sup>H NMR spectrum (CDCl<sub>3</sub>, 500 MHz) of **4v**

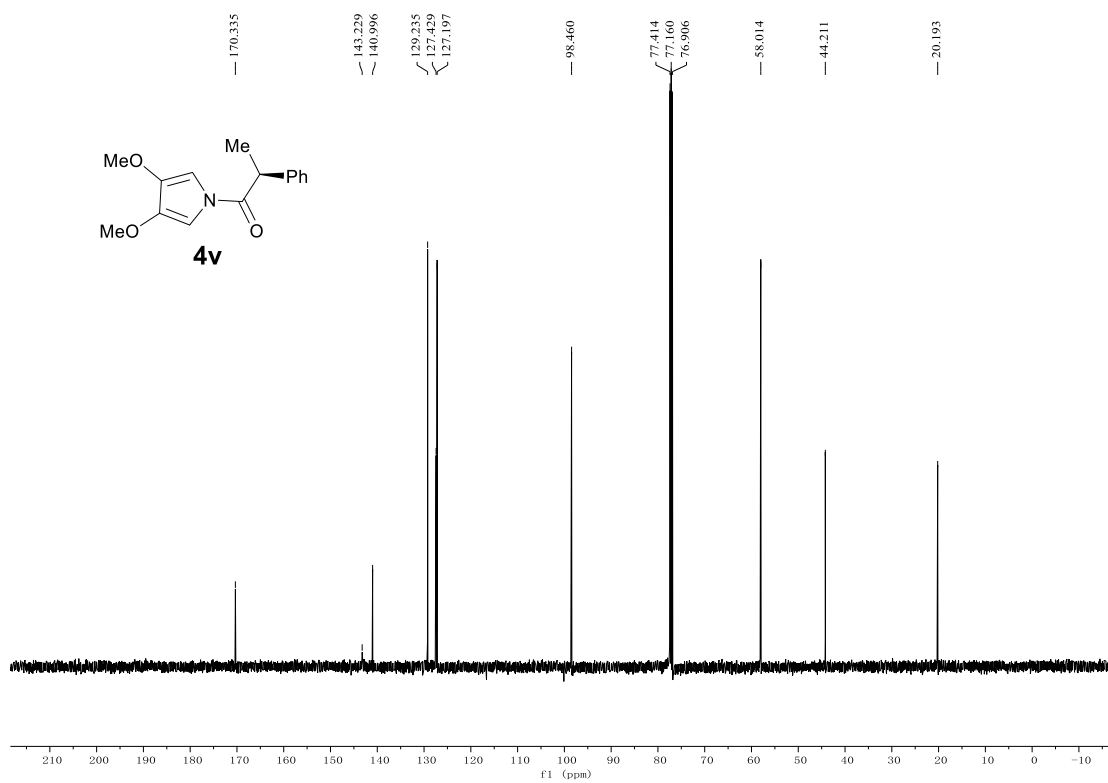

<sup>13</sup>C NMR spectrum (CDCl<sub>3</sub>, 125 MHz) of **4v**

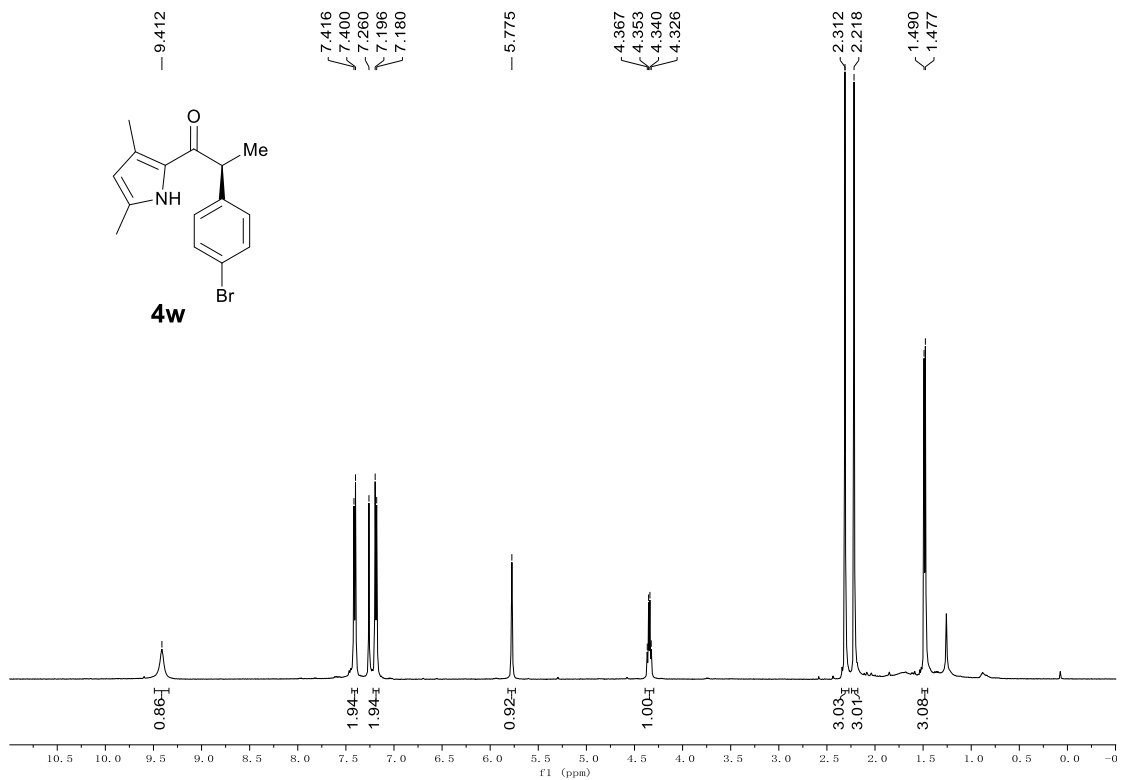

<sup>1</sup>H NMR spectrum (CDCl<sub>3</sub>, 500 MHz) of **4w**

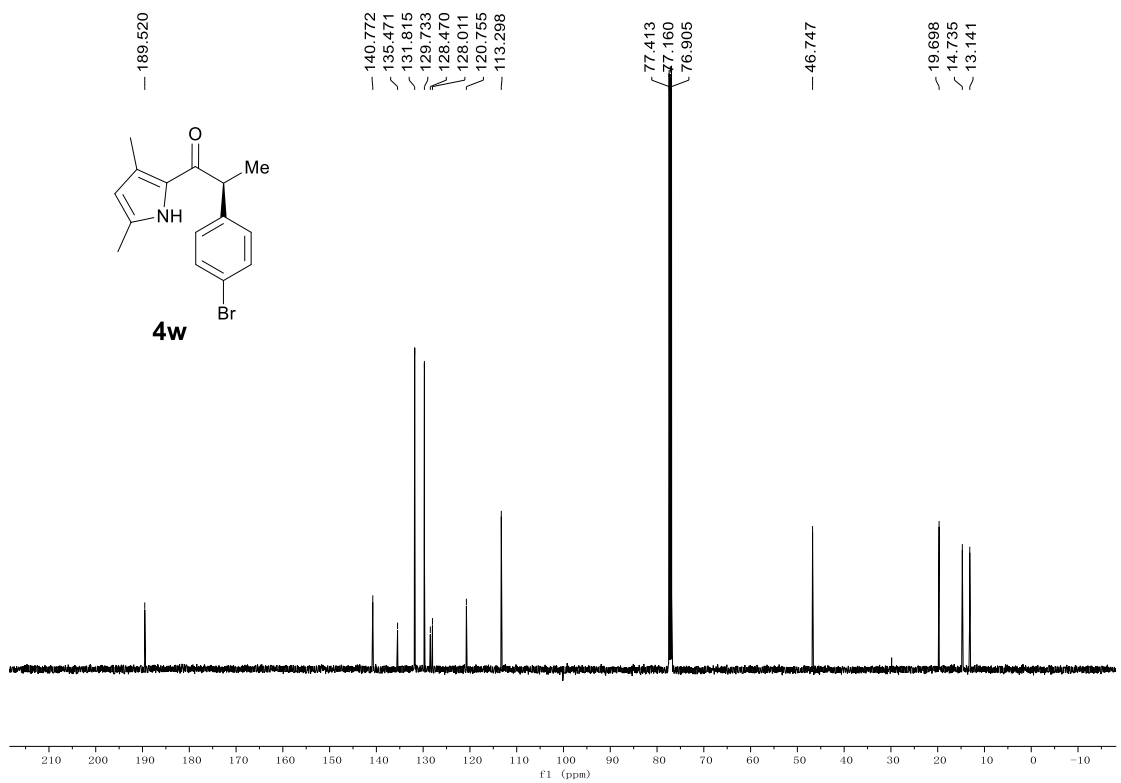

<sup>13</sup>C NMR spectrum (CDCl<sub>3</sub>, 125 MHz) of **4w**

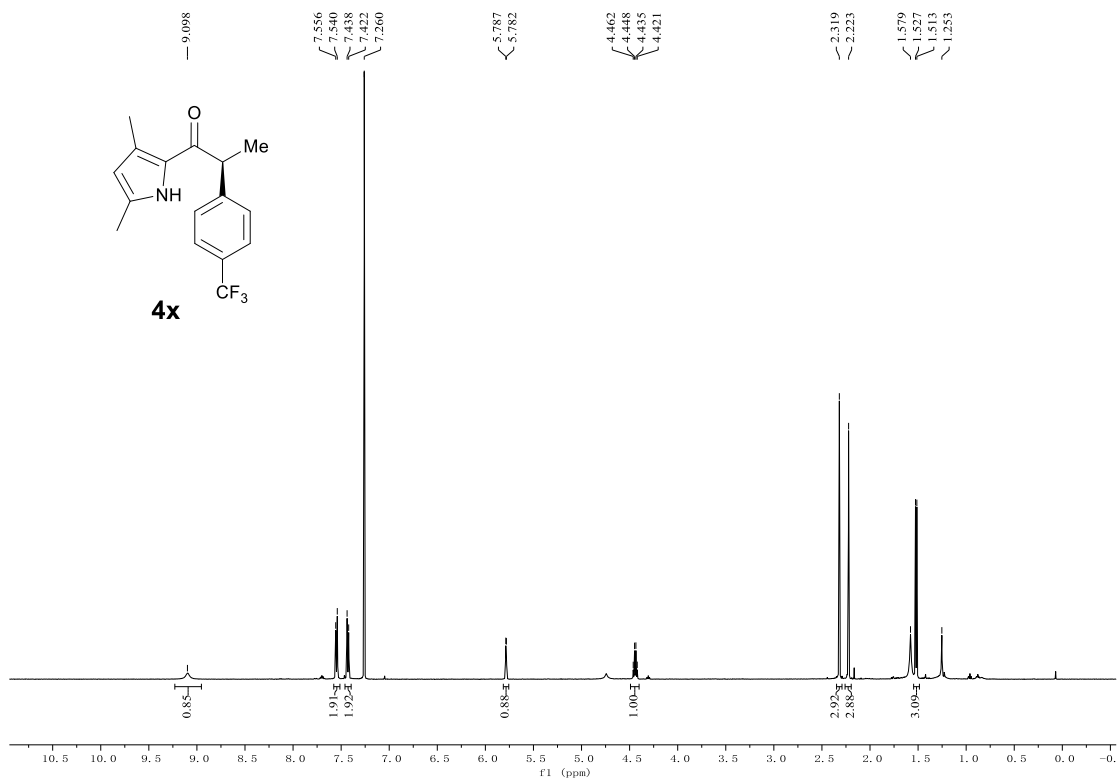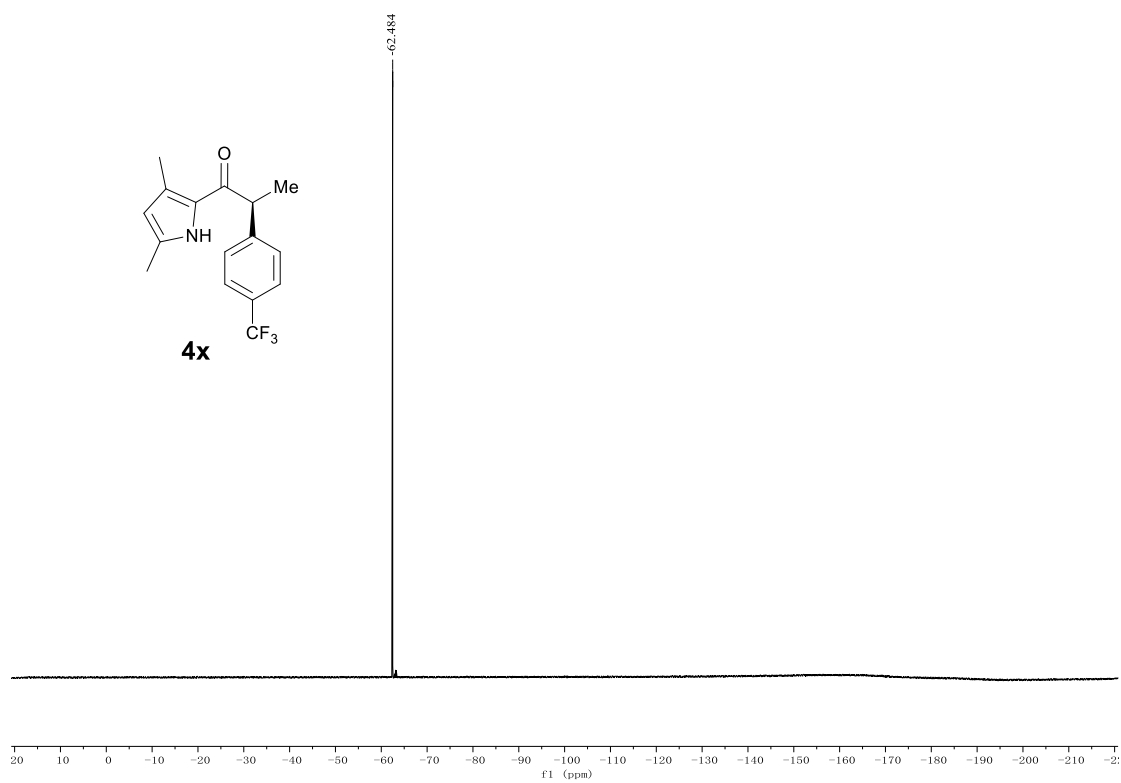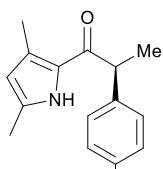

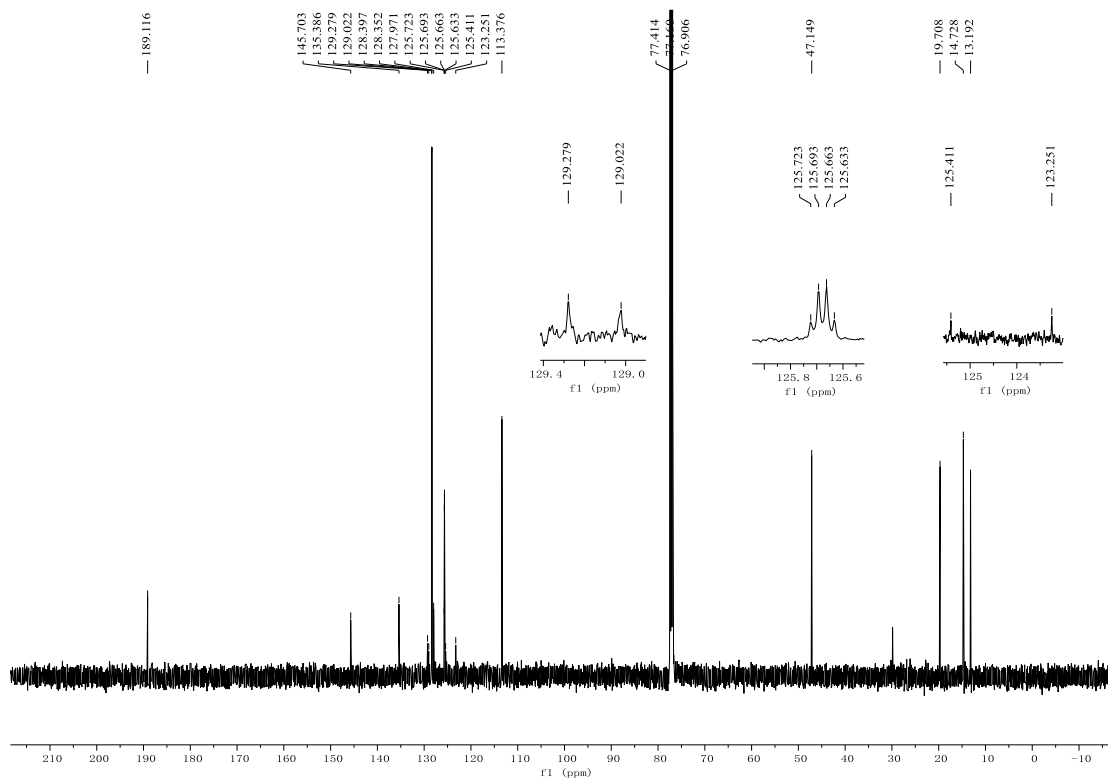

$^{13}\text{C}$  NMR spectrum ( $\text{CDCl}_3$ , 125 MHz) of **4x**

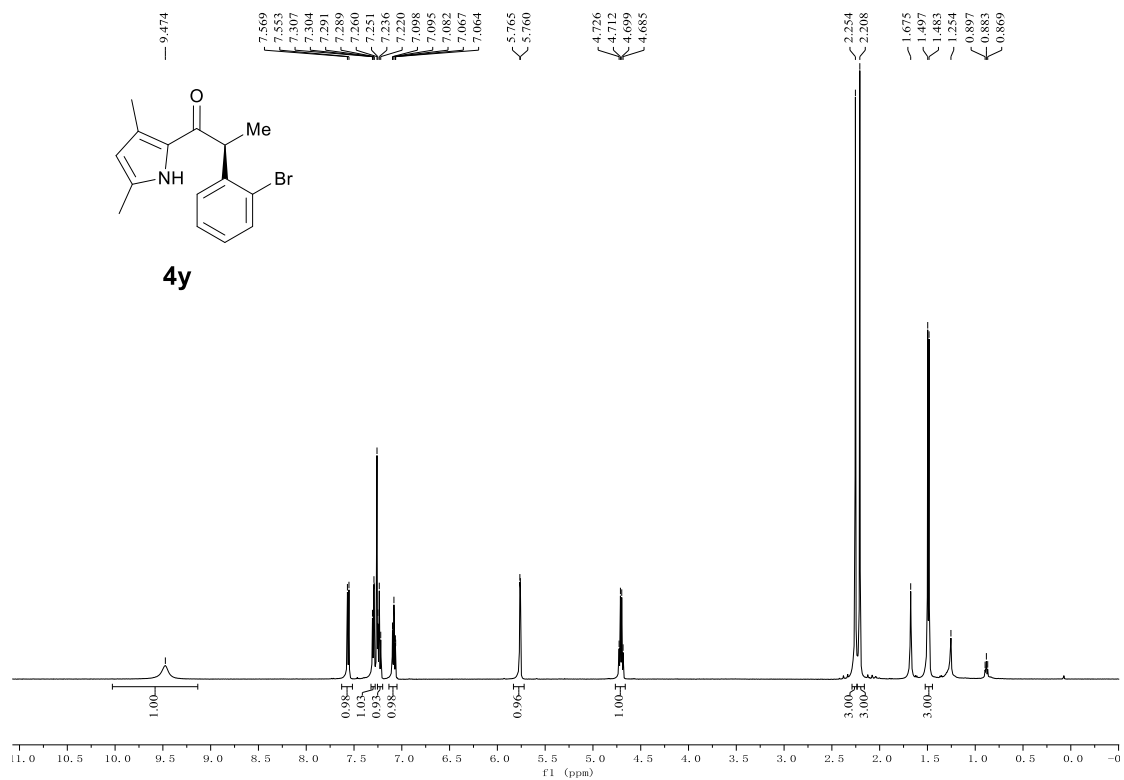

<sup>1</sup>H NMR spectrum (CDCl<sub>3</sub>, 500 MHz) of **4y**

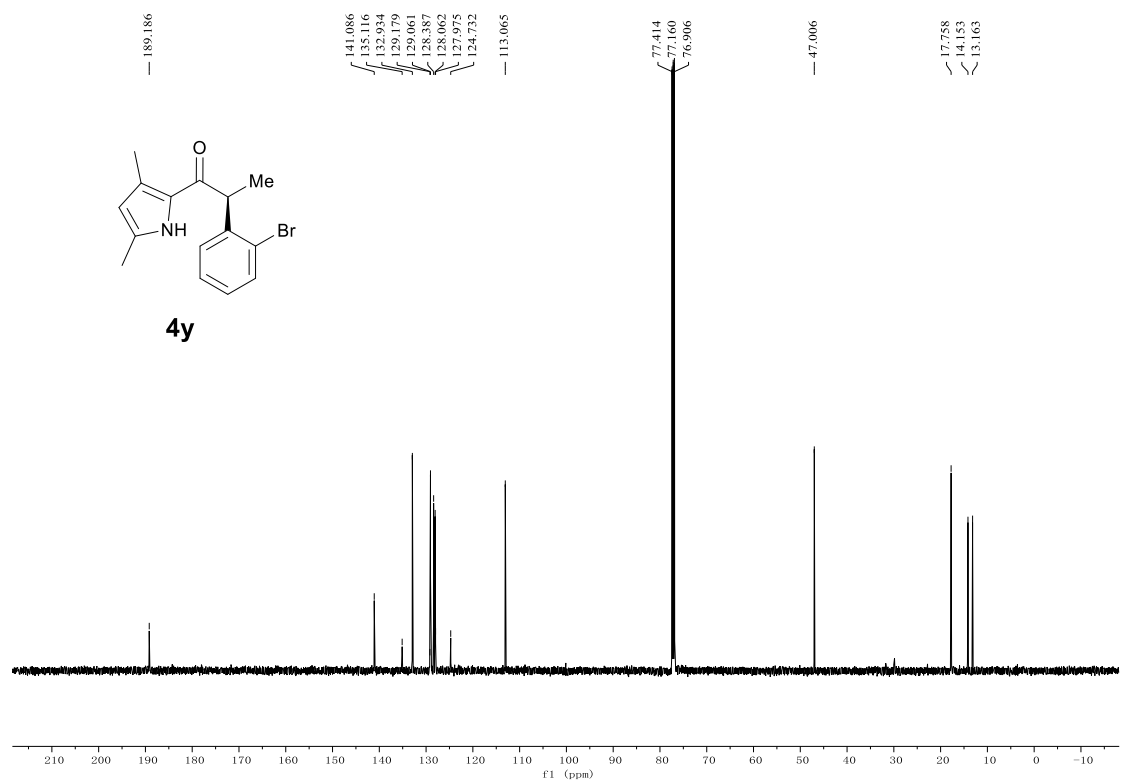

<sup>13</sup>C NMR spectrum (CDCl<sub>3</sub>, 125 MHz) of **4y**

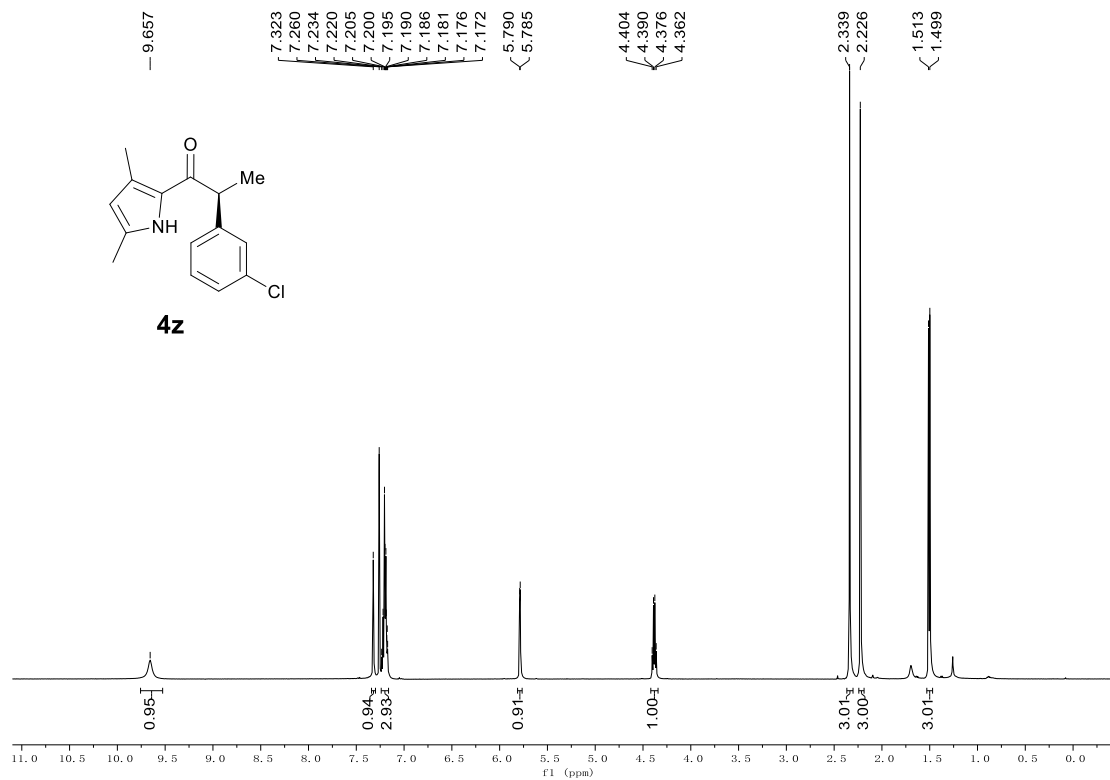

<sup>1</sup>H NMR spectrum (CDCl<sub>3</sub>, 500 MHz) of **4z**

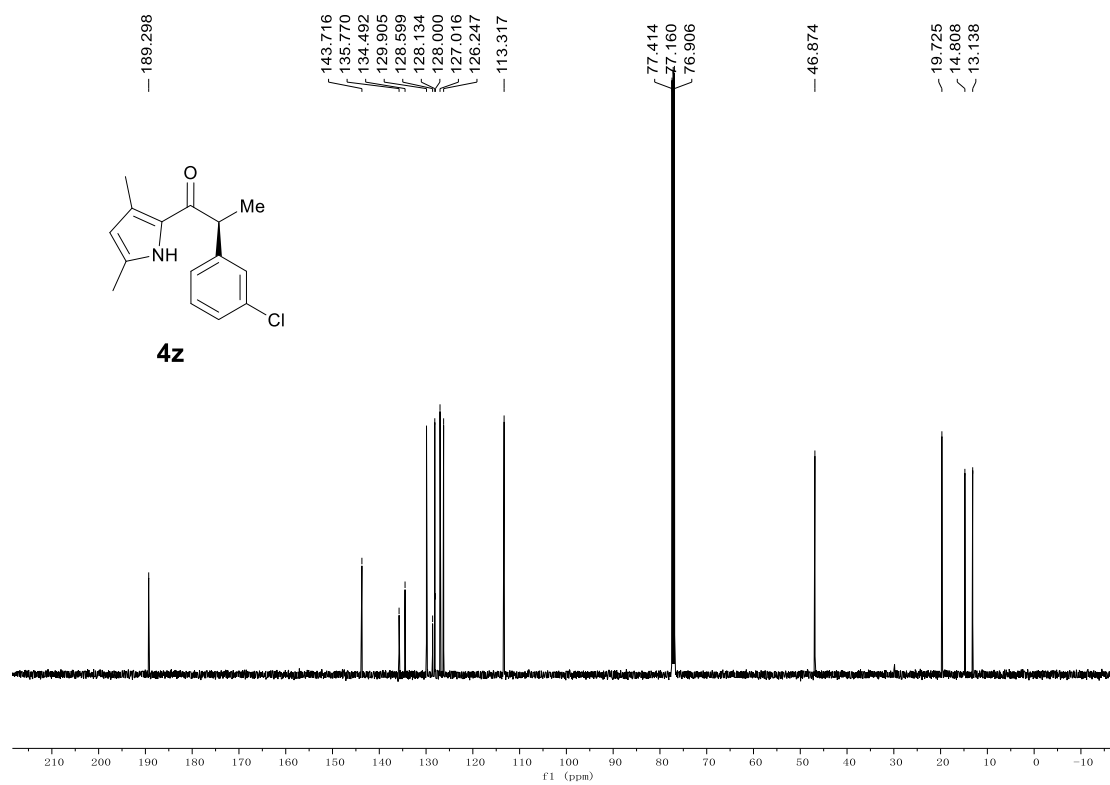

<sup>13</sup>C NMR spectrum (CDCl<sub>3</sub>, 125 MHz) of **4z**



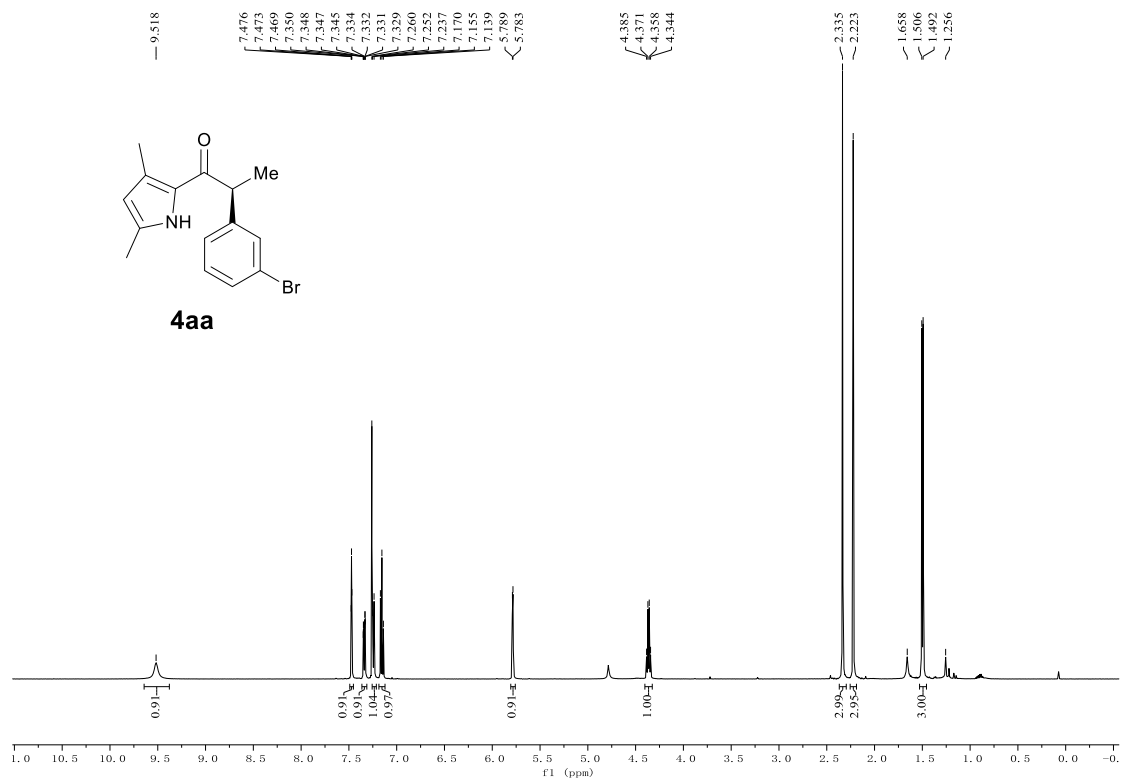

<sup>1</sup>H NMR spectrum (CDCl<sub>3</sub>, 500 MHz) of **4aa**

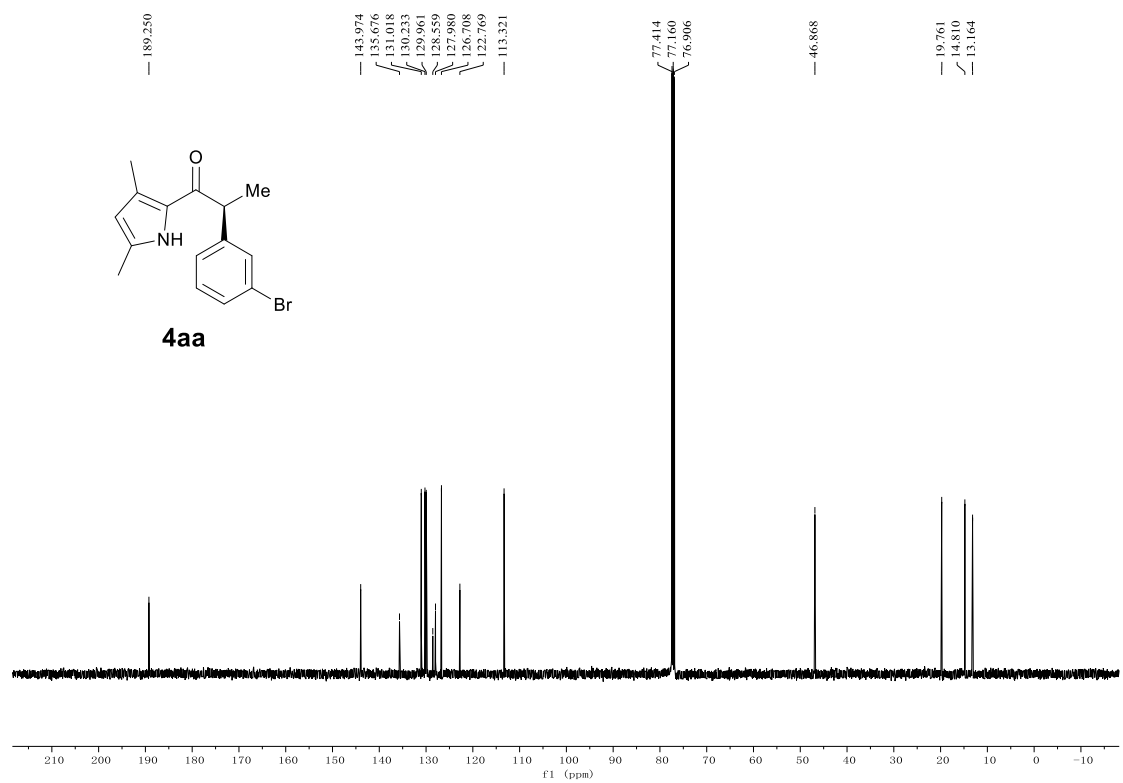

<sup>13</sup>C NMR spectrum (CDCl<sub>3</sub>, 125 MHz) of **4aa**

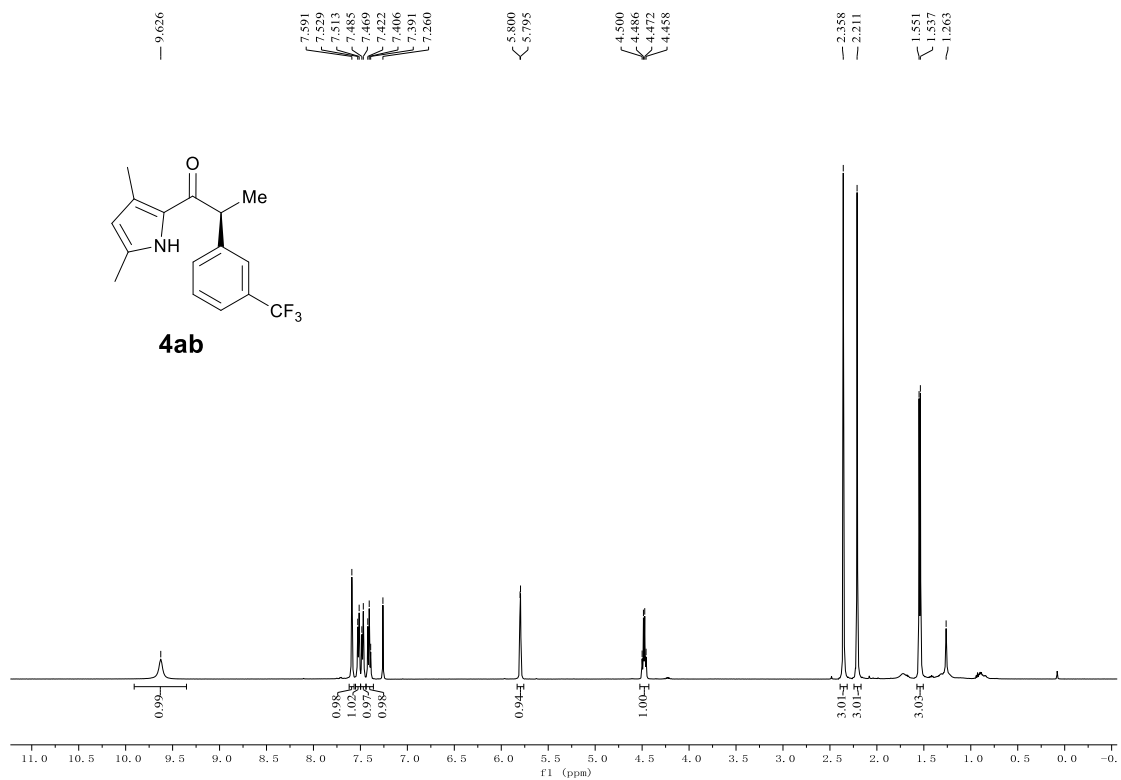

$^1\text{H}$  NMR spectrum (CDCl<sub>3</sub>, 500 MHz) of **4ab**

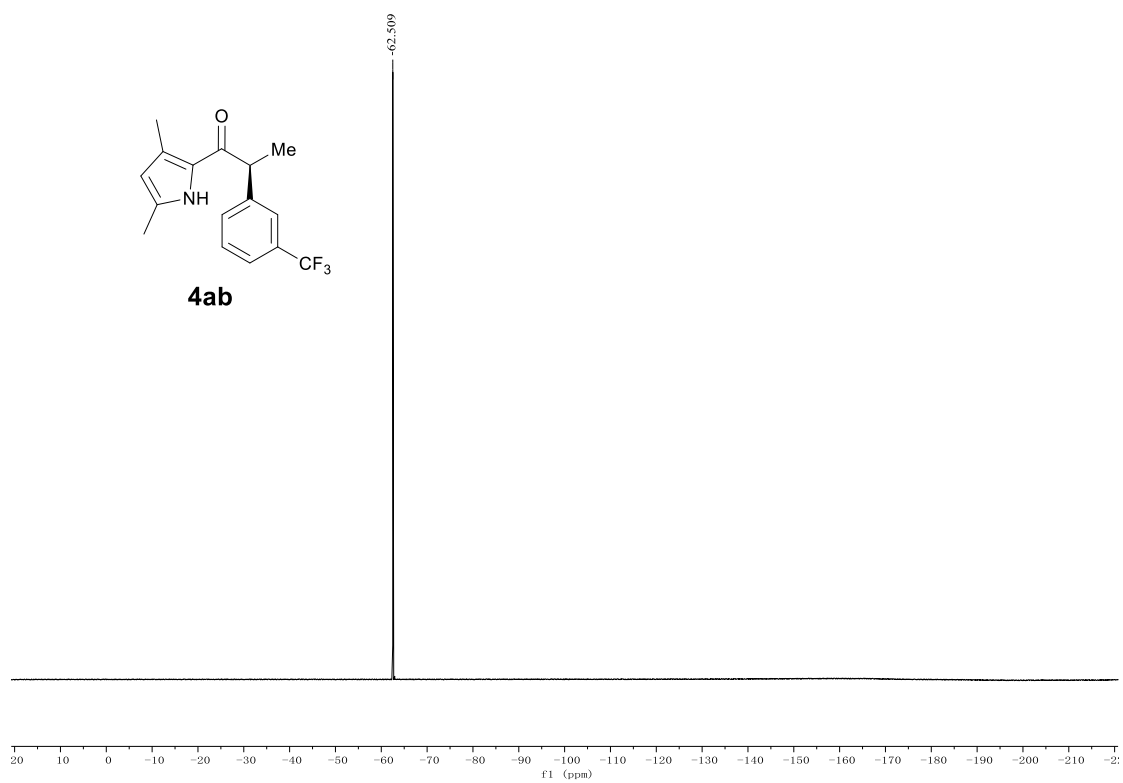

$^{19}\text{F}$  NMR spectrum (CDCl<sub>3</sub>, 471 MHz) of **4ab**

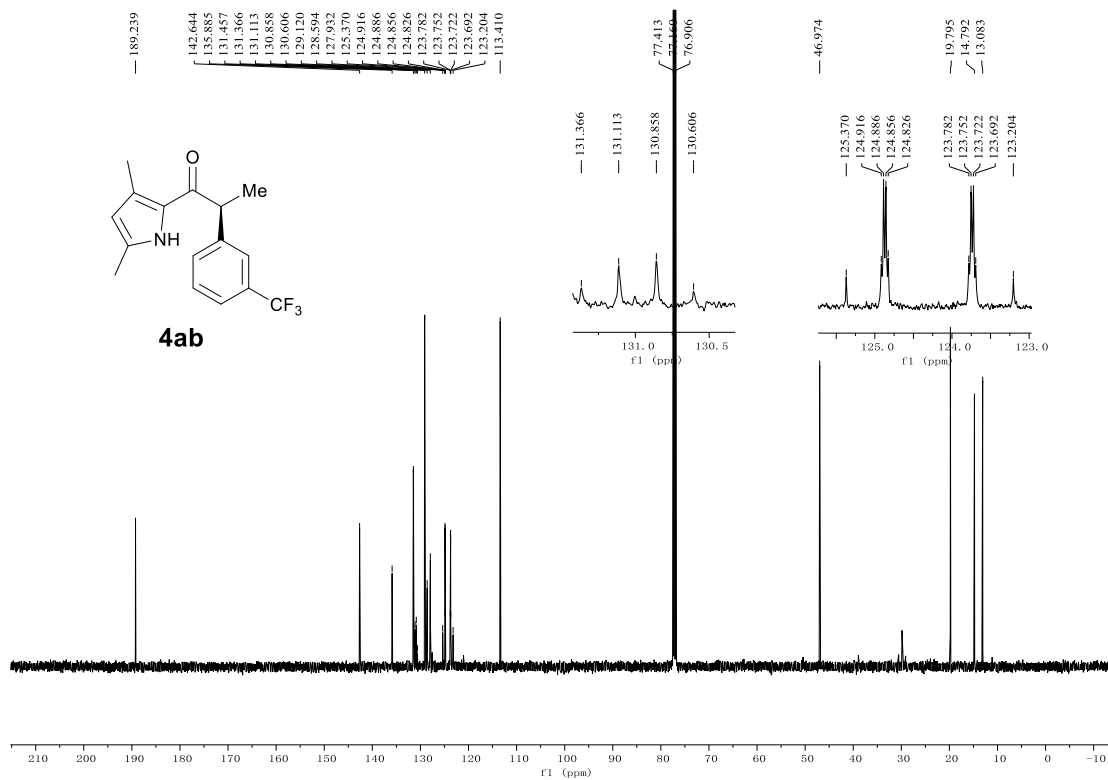

$^{13}\text{C}$  NMR spectrum (CDCl<sub>3</sub>, 125 MHz) of **4ab**

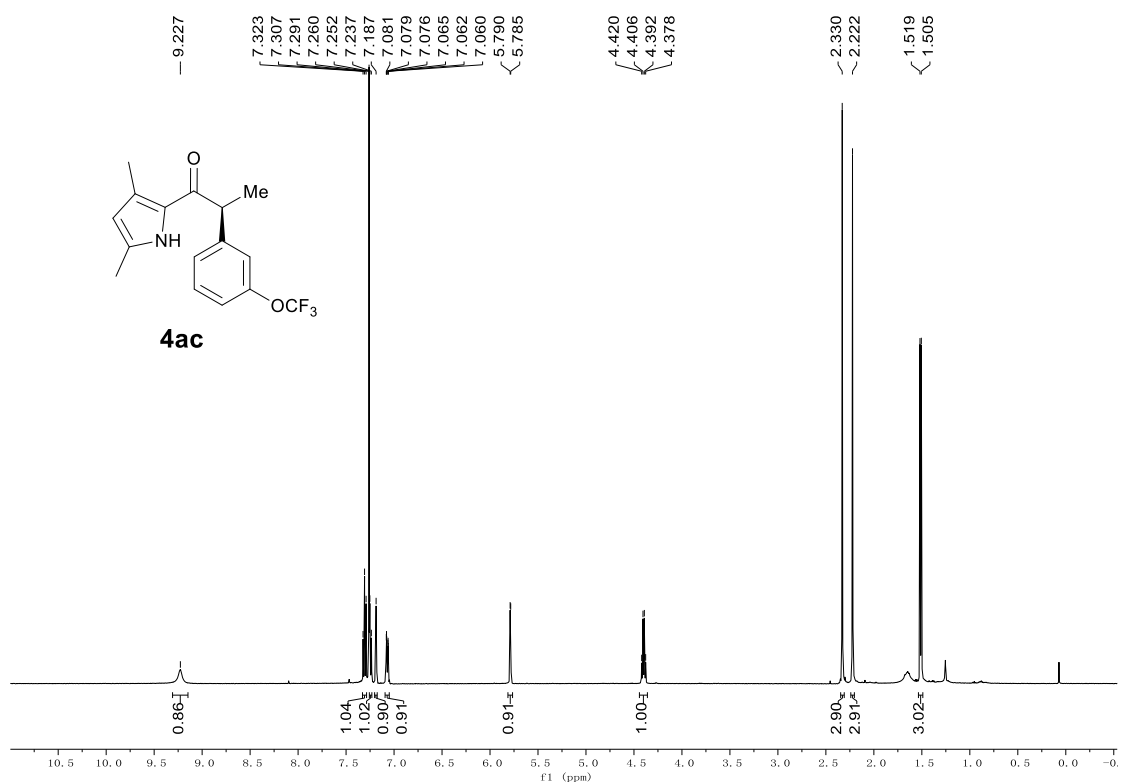

<sup>1</sup>H NMR spectrum (CDCl<sub>3</sub>, 500 MHz) of **4ac**

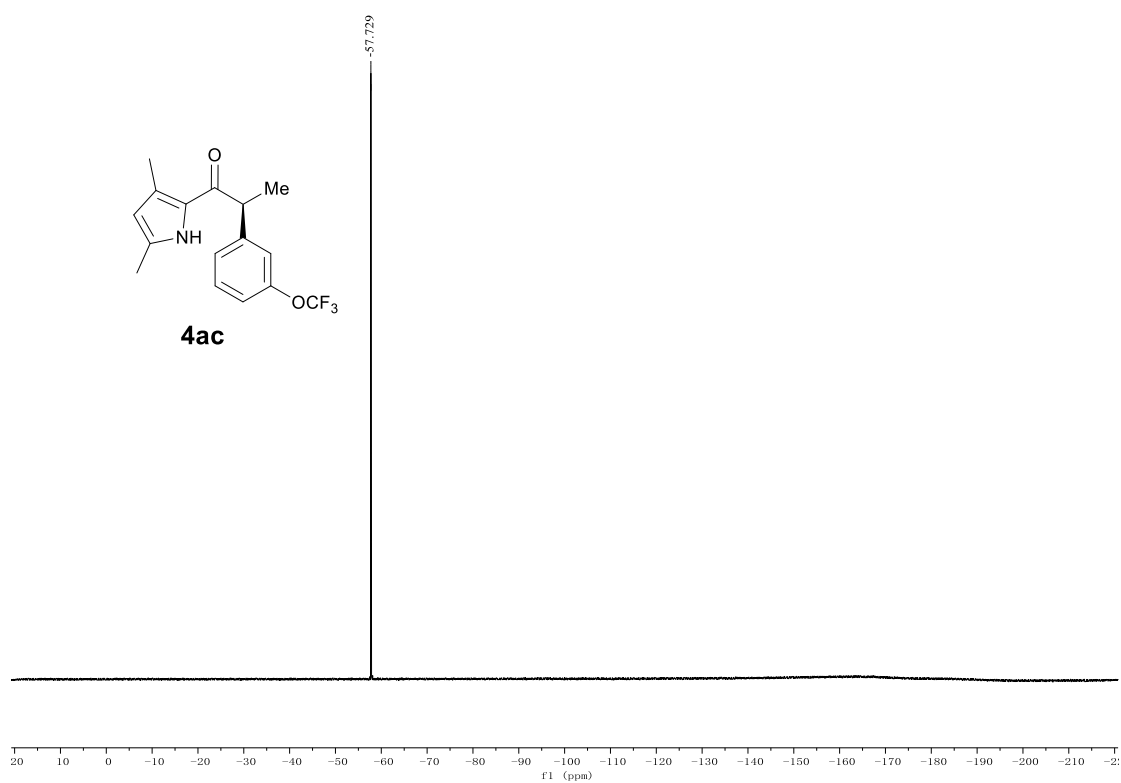

<sup>19</sup>F NMR spectrum (CDCl<sub>3</sub>, 471 MHz) of **4ac**

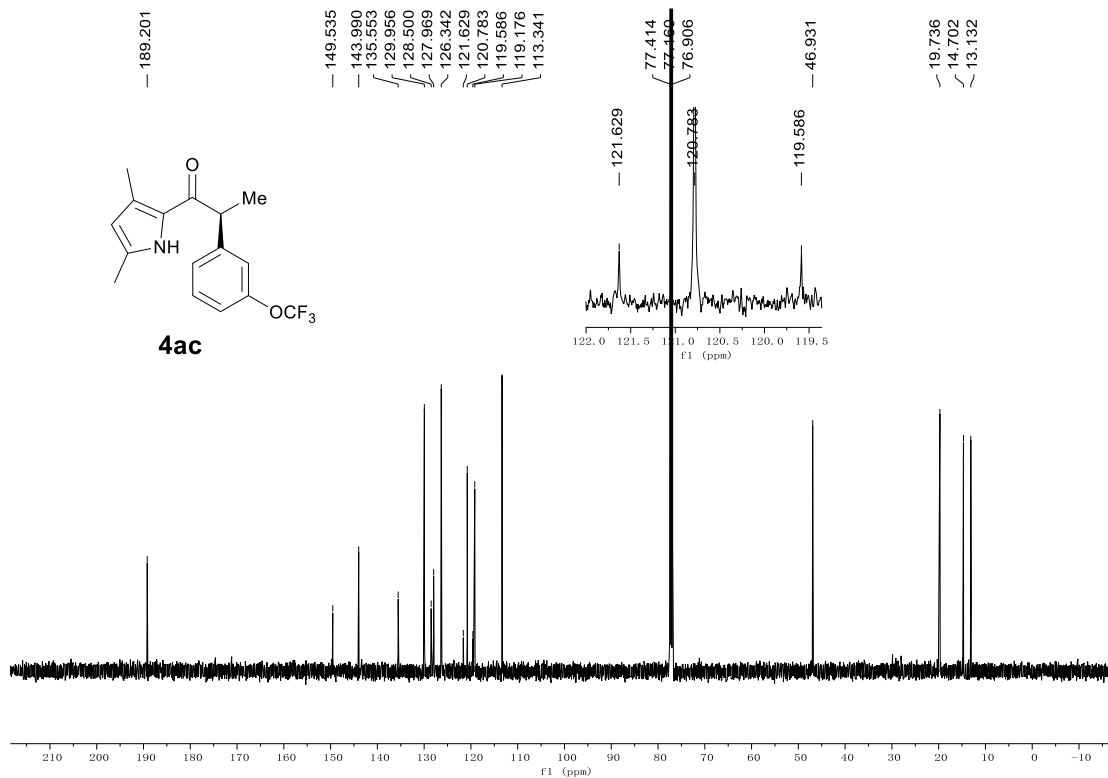

$^{13}\text{C}$  NMR spectrum (CDCl<sub>3</sub>, 125 MHz) of **4ac**

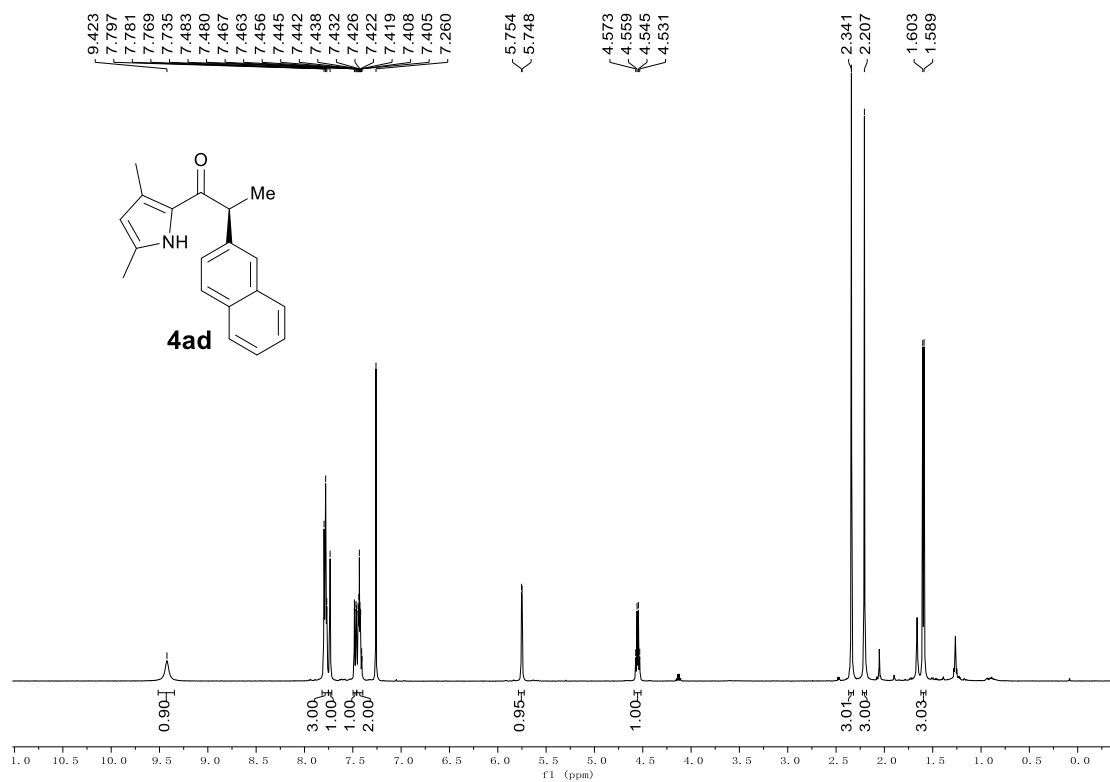

<sup>1</sup>H NMR spectrum (CDCl<sub>3</sub>, 500 MHz) of **4ad**

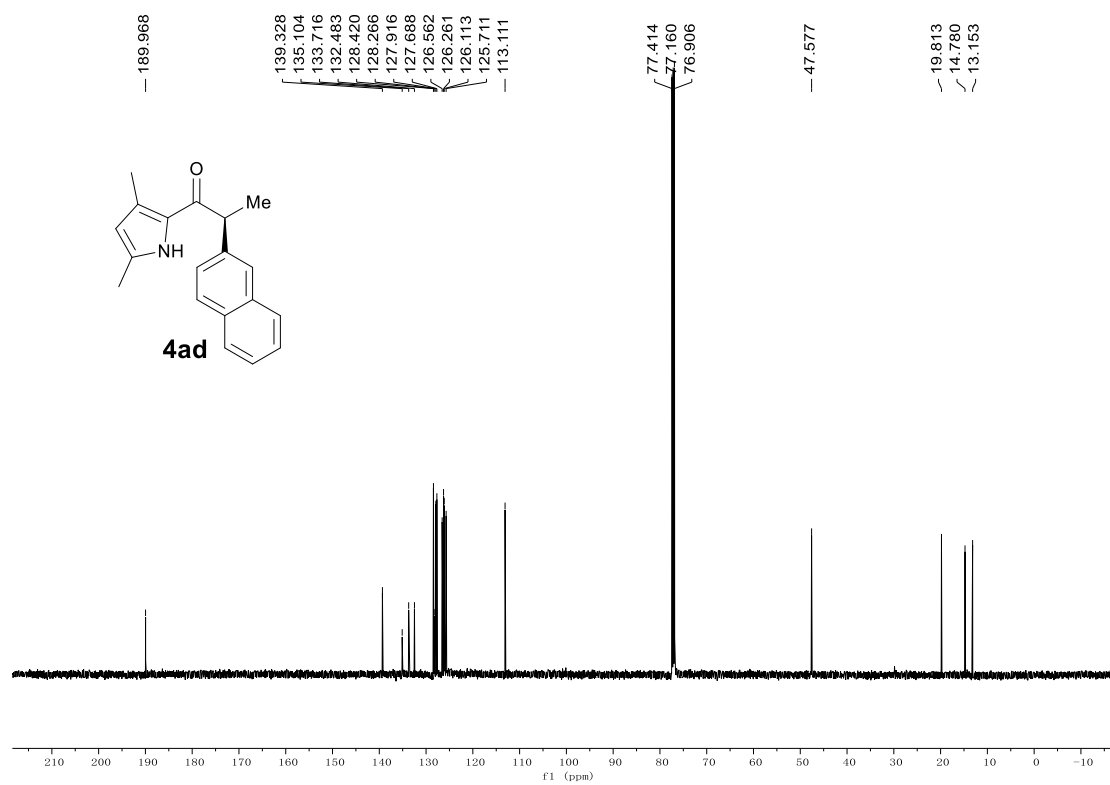

<sup>13</sup>C NMR spectrum (CDCl<sub>3</sub>, 125 MHz) of **4ad**

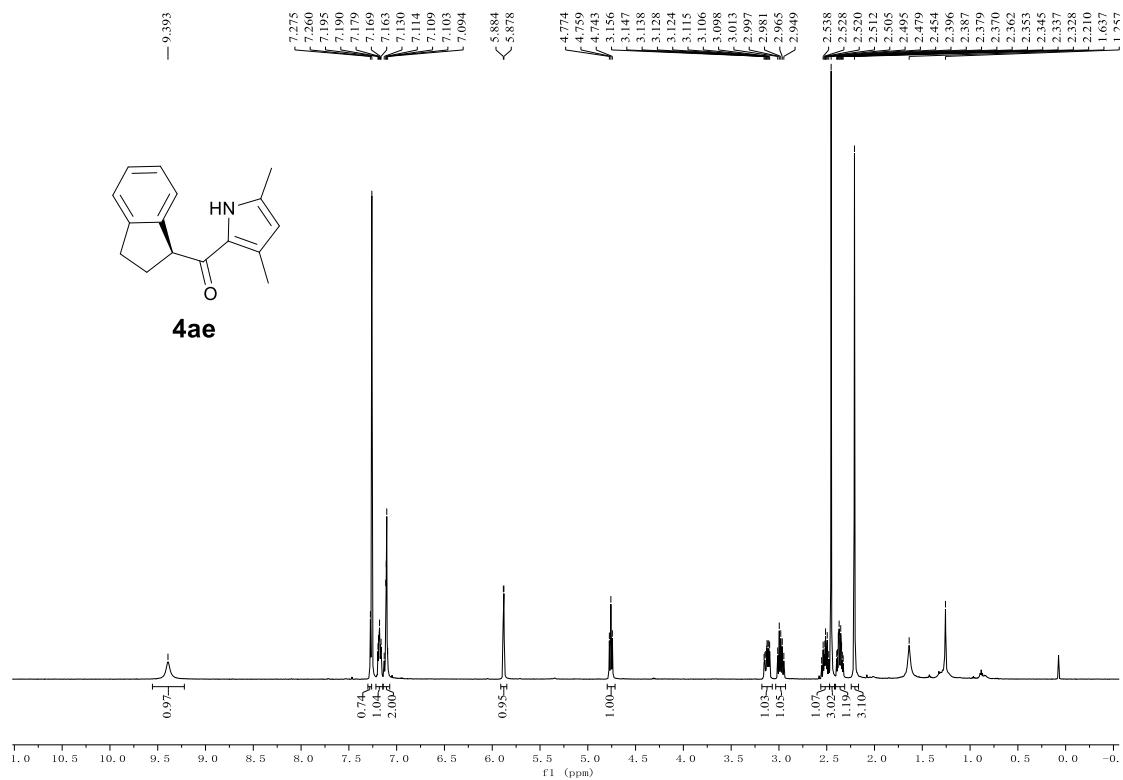

<sup>1</sup>H NMR spectrum (CDCl<sub>3</sub>, 500 MHz) of 4ae

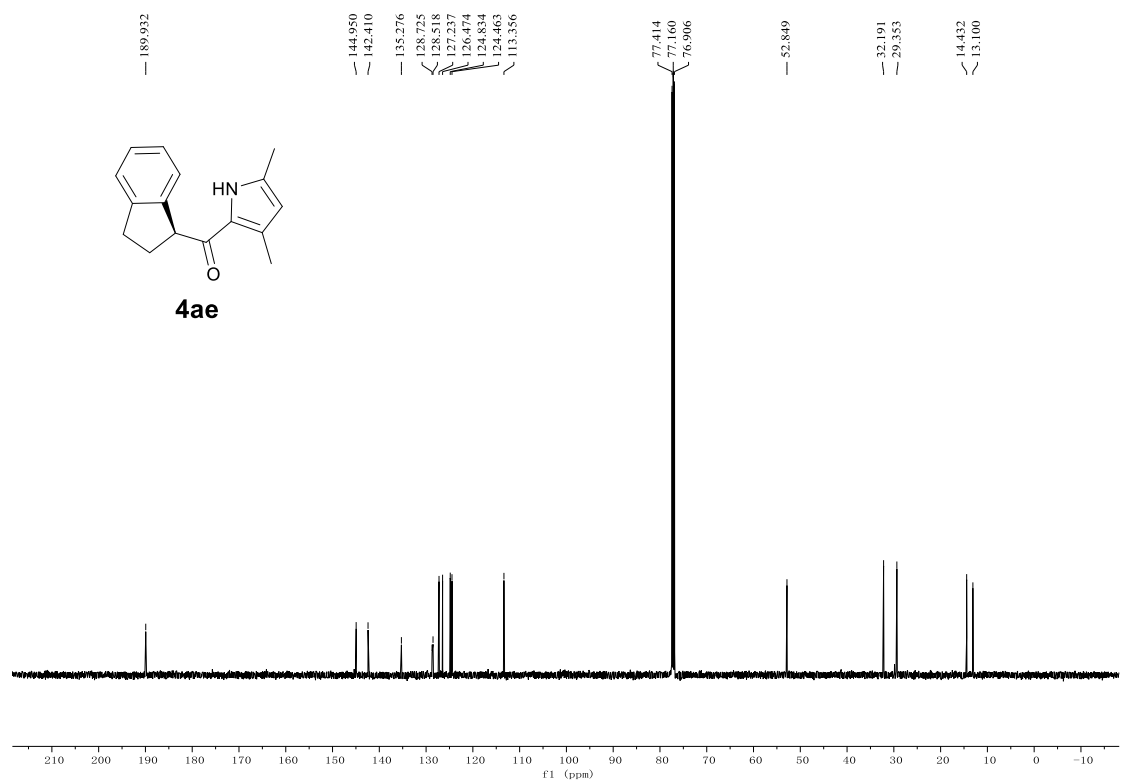

<sup>13</sup>C NMR spectrum (CDCl<sub>3</sub>, 125 MHz) of 4ae

## Chiral HPLC analysis of 4a-4z, 4aa-4ae

Daicel Chiralcel OD-3 column, *n*-hexane/2-propanol = 97:3 (v/v), 1.0 mL/min, 254 nm, r.t

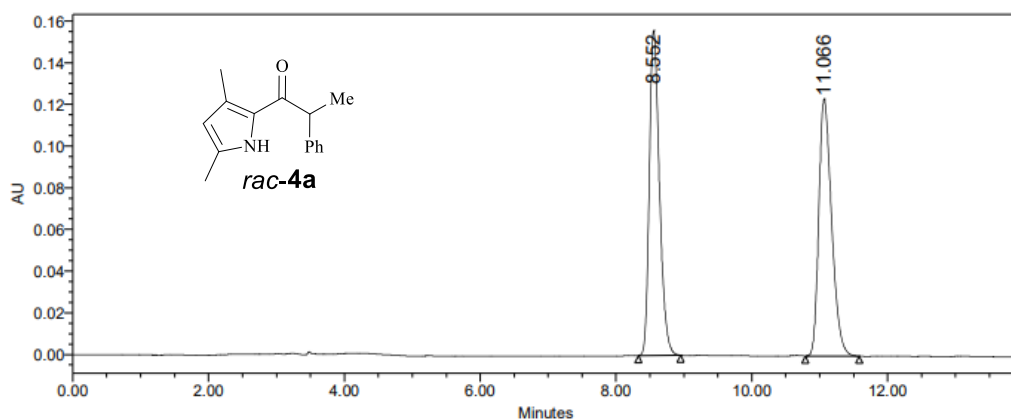

Channel: W2489 ChA; Processed Channel: W2489 ChA 243nm; Result Id: 2603; Processing Method: 9703 OD 3 254

### Processed Channel Descr.: W2489 ChA 243nm

|   | Processed Channel Descr. | RT     | Area    | % Area | Height |
|---|--------------------------|--------|---------|--------|--------|
| 1 | W2489 ChA 243nm          | 8.552  | 1613054 | 49.95  | 155778 |
| 2 | W2489 ChA 243nm          | 11.066 | 1616571 | 50.05  | 123367 |

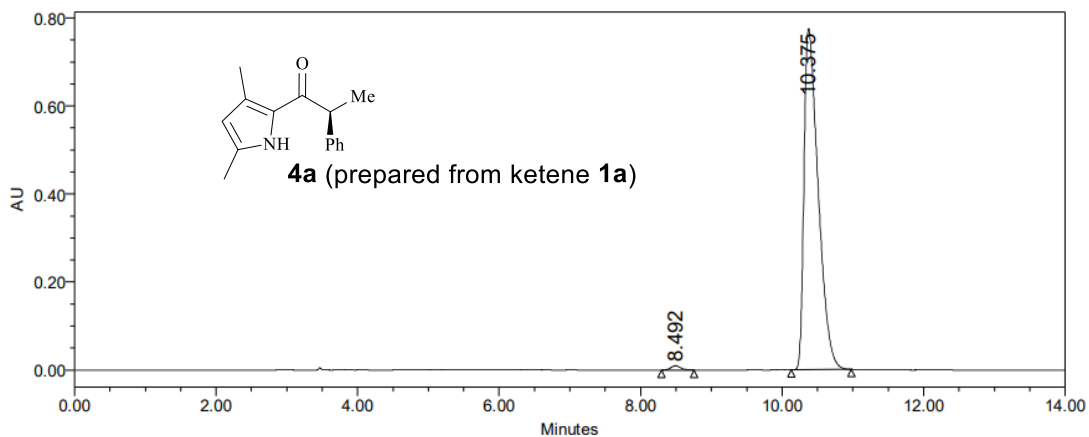

Channel: W2489 ChA; Processed Channel: W2489 ChA 254nm; Result Id: 4331; Processing Method: 9703 OD3 254

### Processed Channel Descr.: W2489 ChA 254nm

|   | Processed Channel Descr. | RT     | Area     | % Area | Height |
|---|--------------------------|--------|----------|--------|--------|
| 1 | W2489 ChA 254nm          | 8.492  | 90053    | 0.83   | 9562   |
| 2 | W2489 ChA 254nm          | 10.375 | 10805130 | 99.17  | 774308 |



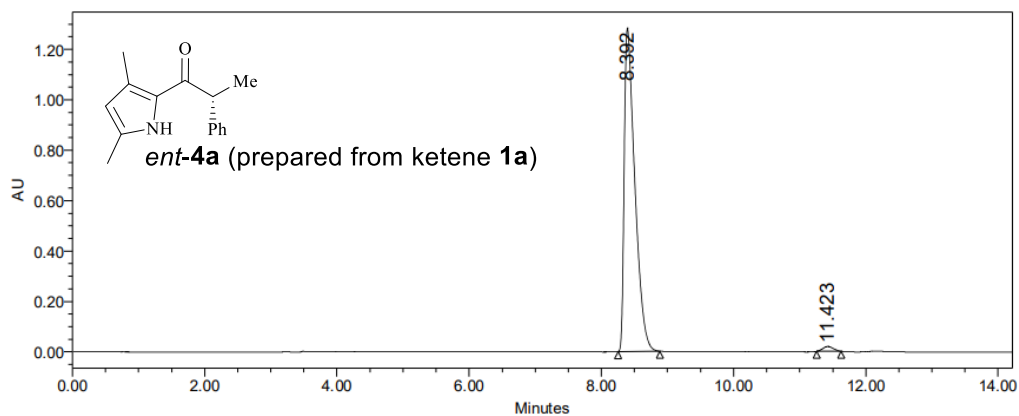

**Processed Channel Descr.: W2489 ChA 254nm**

|   | Processed Channel Descr. | RT     | Area     | % Area | Height  |
|---|--------------------------|--------|----------|--------|---------|
| 1 | W2489 ChA 254nm          | 8.392  | 14280833 | 98.53  | 1282417 |
| 2 | W2489 ChA 254nm          | 11.423 | 213109   | 1.47   | 19263   |

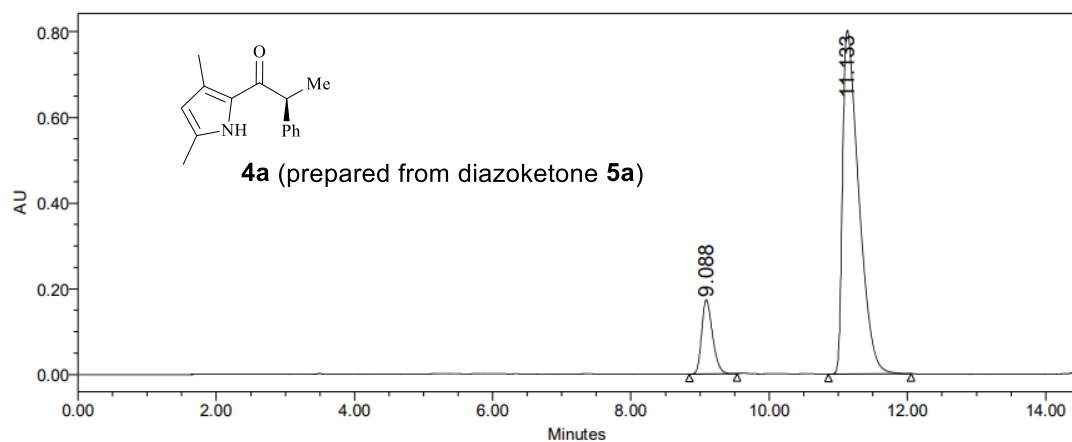

**Processed Channel Descr.: W2489 ChA 254nm**

|   | Processed Channel Descr. | RT     | Area     | % Area | Height |
|---|--------------------------|--------|----------|--------|--------|
| 1 | W2489 ChA 254nm          | 9.088  | 1883527  | 12.58  | 172372 |
| 2 | W2489 ChA 254nm          | 11.133 | 13086677 | 87.42  | 801186 |

Daicel Chiralcel OD-3 column, *n*-hexane/2-propanol = 97:3 (v/v), 1.0 mL/min, 254 nm, r.t

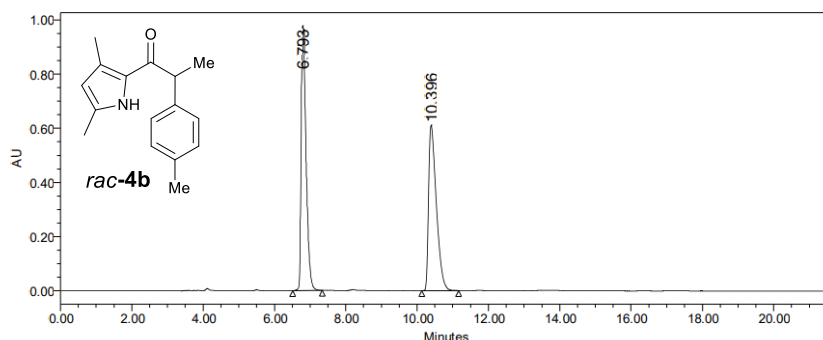

**Processed Channel Descr.: W2489 ChA 254nm**

|   | Processed Channel Descr. | RT     | Area    | % Area | Height |
|---|--------------------------|--------|---------|--------|--------|
| 1 | W2489 ChA 254nm          | 6.793  | 9294808 | 50.22  | 976648 |
| 2 | W2489 ChA 254nm          | 10.396 | 9214921 | 49.78  | 611416 |

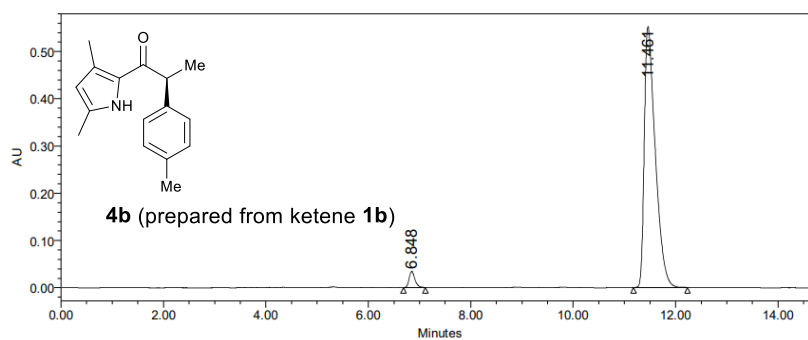

**Processed Channel Descr.: W2489 ChA 254nm**

|   | Processed Channel Descr. | RT     | Area    | % Area | Height |
|---|--------------------------|--------|---------|--------|--------|
| 1 | W2489 ChA 254nm          | 6.848  | 267085  | 3.14   | 34291  |
| 2 | W2489 ChA 254nm          | 11.461 | 8245459 | 96.86  | 551902 |

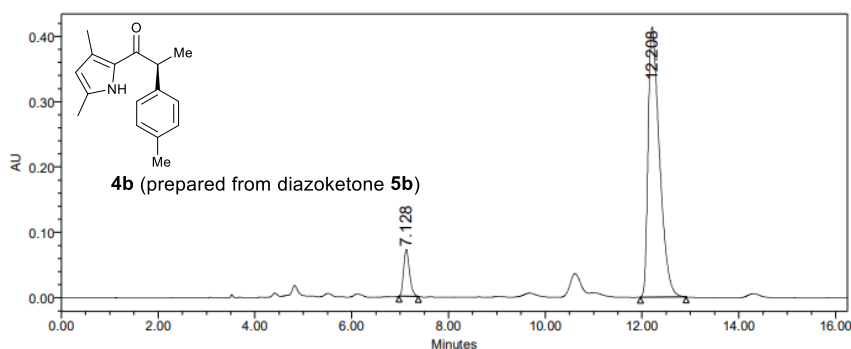

**Processed Channel Descr.: W2489 ChA 254nm**

|   | Processed Channel Descr. | RT     | Area    | % Area | Height |
|---|--------------------------|--------|---------|--------|--------|
| 1 | W2489 ChA 254nm          | 7.128  | 601228  | 8.15   | 71013  |
| 2 | W2489 ChA 254nm          | 12.208 | 6780090 | 91.85  | 412485 |

Daicel Chiralcel OD-3 column, *n*-hexane/2-propanol = 97:3 (v/v), 1.0 mL/min, 254 nm, r.t

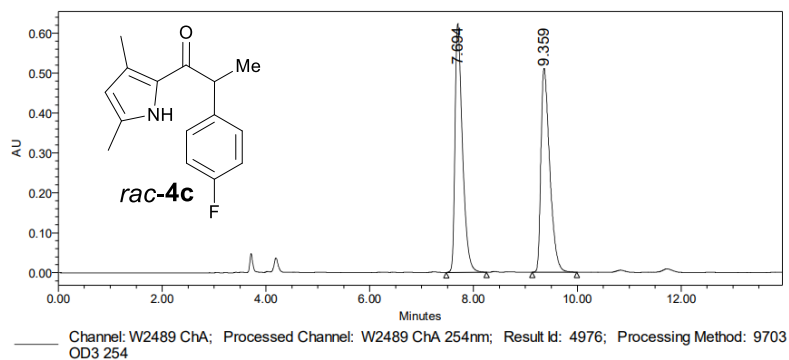

**Processed Channel Descr.: W2489 ChA 254nm**

|   | Processed Channel Descr. | RT    | Area    | % Area | Height |
|---|--------------------------|-------|---------|--------|--------|
| 1 | W2489 ChA 254nm          | 7.694 | 6191793 | 50.75  | 622562 |
| 2 | W2489 ChA 254nm          | 9.359 | 6009101 | 49.25  | 510008 |

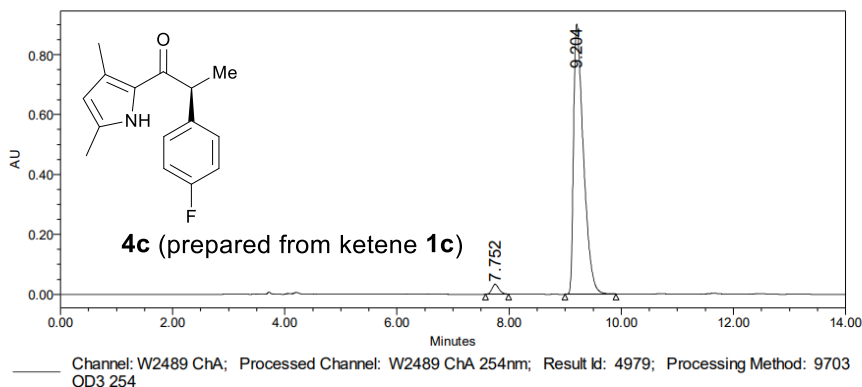

**Processed Channel Descr.: W2489 ChA 254nm**

|   | Processed Channel Descr. | RT    | Area     | % Area | Height |
|---|--------------------------|-------|----------|--------|--------|
| 1 | W2489 ChA 254nm          | 7.752 | 285102   | 2.53   | 32780  |
| 2 | W2489 ChA 254nm          | 9.204 | 10977336 | 97.47  | 900420 |

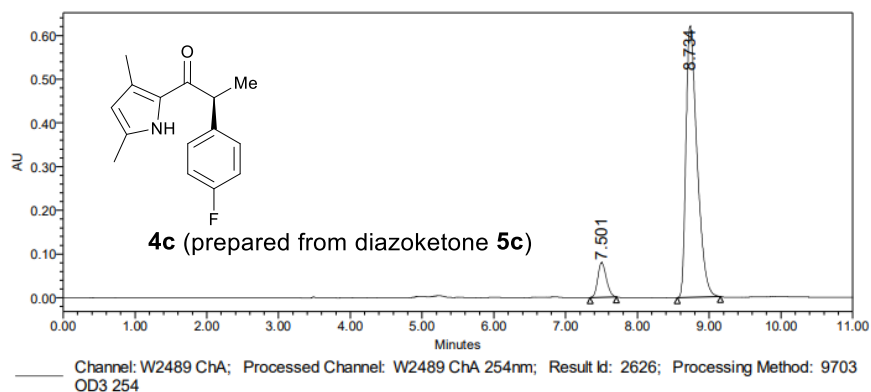

**Processed Channel Descr.: W2489 ChA 254nm**

|   | Processed Channel Descr. | RT    | Area    | % Area | Height |
|---|--------------------------|-------|---------|--------|--------|
| 1 | W2489 ChA 254nm          | 7.501 | 658096  | 8.99   | 79474  |
| 2 | W2489 ChA 254nm          | 8.734 | 6662586 | 91.01  | 619962 |

Daicel Chiralcel OD-3 column, *n*-hexane/2-propanol = 97:3 (v/v), 1.0 mL/min, 254 nm, r.t

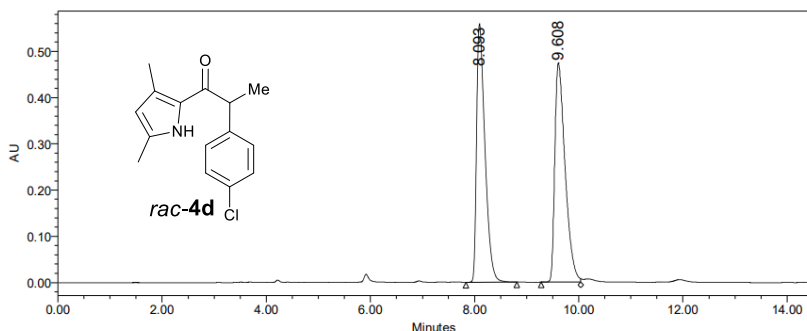

Channel: W2489 ChA; Processed Channel: W2489 ChA 254nm; Result Id: 4943; Processing Method: 9703 OD3 254

**Processed Channel Descr.: W2489 ChA 254nm**

| Processed Channel Descr. | RT    | Area    | % Area | Height |
|--------------------------|-------|---------|--------|--------|
| 1 W2489 ChA 254nm        | 8.093 | 6238217 | 48.85  | 558447 |
| 2 W2489 ChA 254nm        | 9.608 | 6532246 | 51.15  | 474054 |

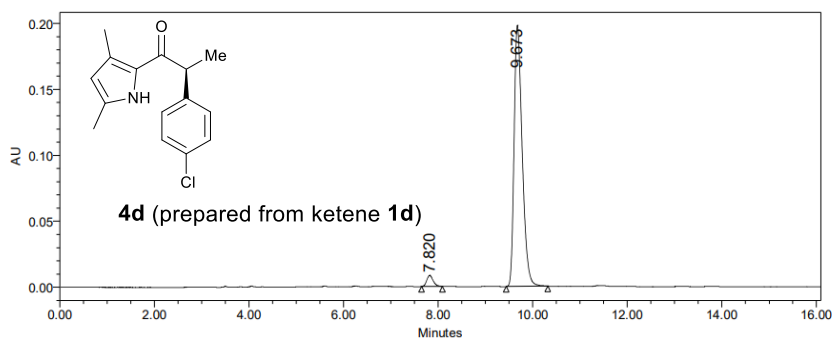

Channel: W2489 ChA; Processed Channel: W2489 ChA 254nm; Result Id: 4995; Processing Method: 9703 OD3 254

**Processed Channel Descr.: W2489 ChA 254nm**

| Processed Channel Descr. | RT    | Area    | % Area | Height |
|--------------------------|-------|---------|--------|--------|
| 1 W2489 ChA 254nm        | 7.820 | 77514   | 3.20   | 8325   |
| 2 W2489 ChA 254nm        | 9.673 | 2344470 | 96.80  | 197900 |

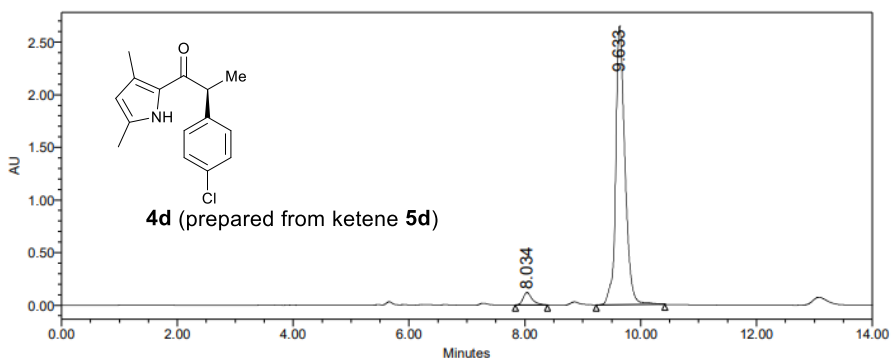

Channel: W2489 ChA; Processed Channel: W2489 ChA 254nm; Result Id: 5216; Processing Method: 9703 OD3 254

**Processed Channel Descr.: W2489 ChA 254nm**

| Processed Channel Descr. | RT    | Area     | % Area | Height  |
|--------------------------|-------|----------|--------|---------|
| 1 W2489 ChA 254nm        | 8.034 | 1298052  | 4.22   | 118403  |
| 2 W2489 ChA 254nm        | 9.633 | 29489647 | 95.78  | 2644554 |

Daicel Chiralcel OD-3 column, *n*-hexane/2-propanol = 97:3 (v/v), 1.0 mL/min, 254 nm, r.t

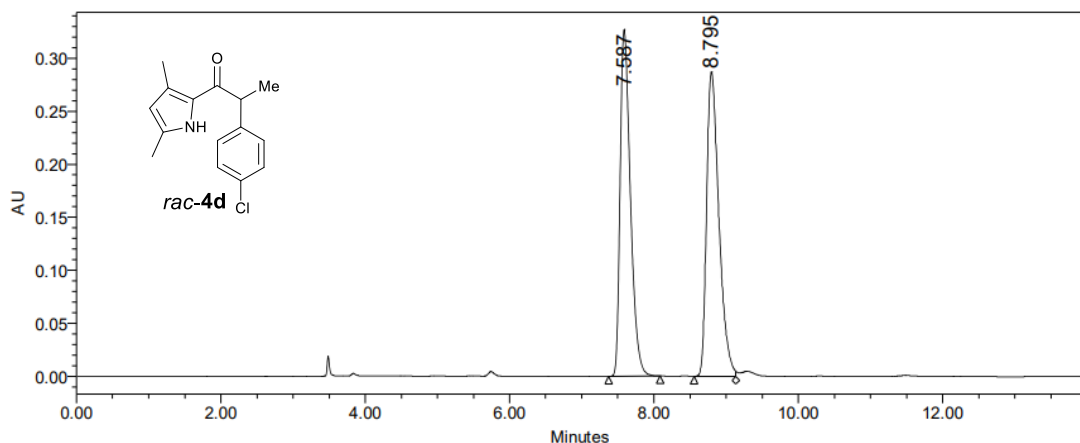

Channel: W2489 ChA; Processed Channel: W2489 ChA 254nm; Result Id: 5615; Processing Method: 9703 OD 3 254

**Processed Channel Descr.: W2489 ChA 254nm**

|   | Processed Channel Descr. | RT    | Area    | % Area | Height |
|---|--------------------------|-------|---------|--------|--------|
| 1 | W2489 ChA 254nm          | 7.587 | 3230363 | 48.75  | 326911 |
| 2 | W2489 ChA 254nm          | 8.795 | 3395758 | 51.25  | 287074 |

HPLC analysis for 1 mmol reaction of 5d with 2a

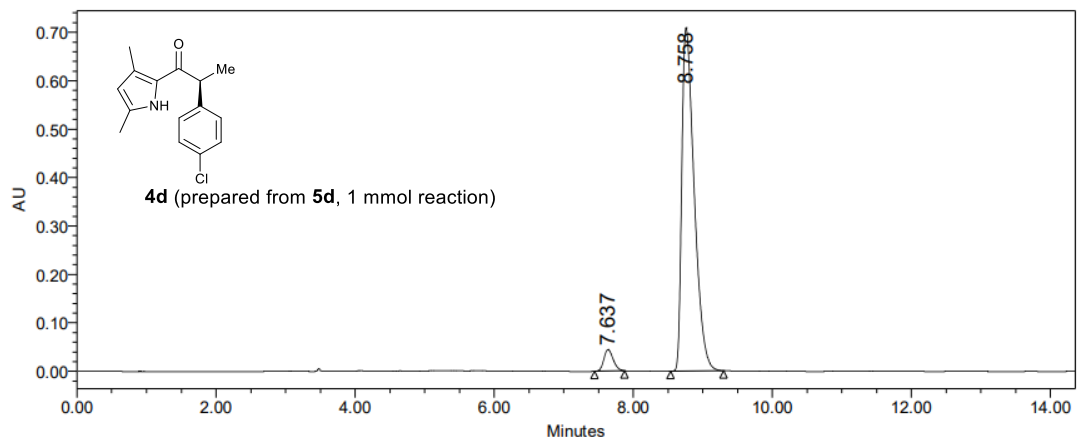

Channel: W2489 ChA; Processed Channel: W2489 ChA 254nm; Result Id: 5610; Processing Method: 9703 OD3 254

**Processed Channel Descr.: W2489 ChA 254nm**

|   | Processed Channel Descr. | RT    | Area    | % Area | Height |
|---|--------------------------|-------|---------|--------|--------|
| 1 | W2489 ChA 254nm          | 7.637 | 417851  | 4.56   | 44917  |
| 2 | W2489 ChA 254nm          | 8.758 | 8753694 | 95.44  | 708744 |

Daicel Chiralcel OD-3 column, *n*-hexane/2-propanol = 97:3 (v/v), 1.0 mL/min, 254 nm, r.t

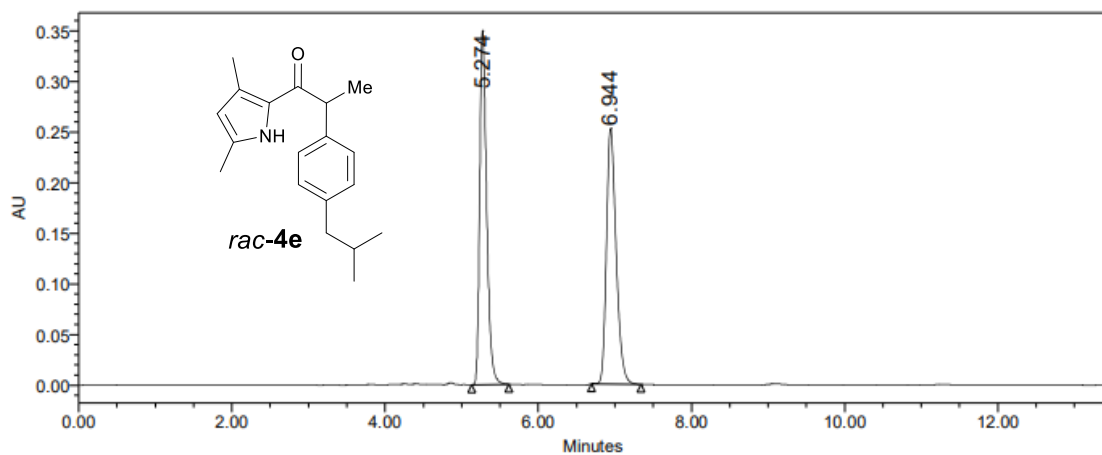

Channel: W2489 ChA; Processed Channel: W2489 ChA 254nm; Result Id: 5214; Processing Method: 9703 OD 3 243

**Processed Channel Descr.: W2489 ChA 254nm**

|   | Processed Channel Descr. | RT    | Area    | % Area | Height |
|---|--------------------------|-------|---------|--------|--------|
| 1 | W2489 ChA 254nm          | 5.274 | 2215009 | 49.94  | 349873 |
| 2 | W2489 ChA 254nm          | 6.944 | 2220677 | 50.06  | 252435 |

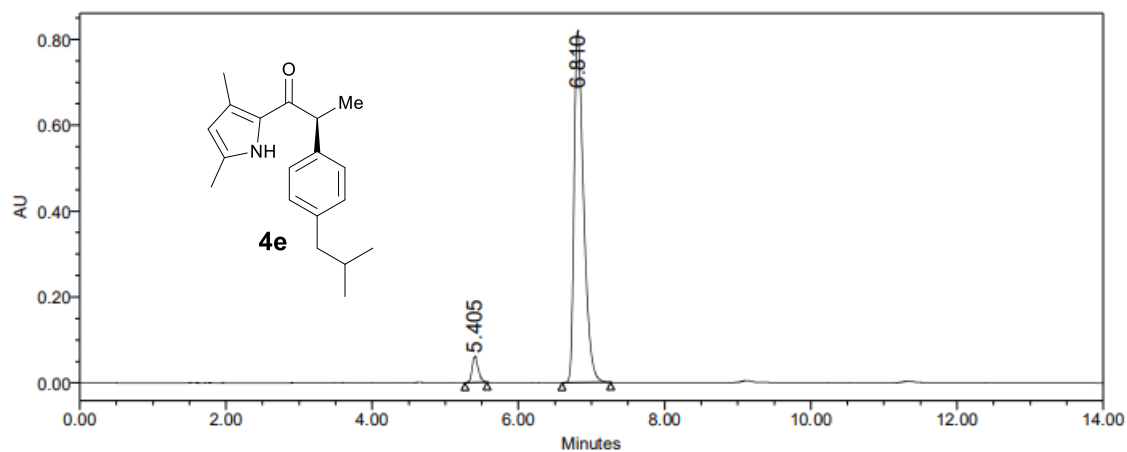

Channel: W2489 ChA; Processed Channel: W2489 ChA 254nm; Result Id: 5212; Processing Method: 9703 OD 3 243

**Processed Channel Descr.: W2489 ChA 254nm**

|   | Processed Channel Descr. | RT    | Area    | % Area | Height |
|---|--------------------------|-------|---------|--------|--------|
| 1 | W2489 ChA 254nm          | 5.405 | 358967  | 4.63   | 60372  |
| 2 | W2489 ChA 254nm          | 6.810 | 7386938 | 95.37  | 819183 |

Daicel Chiralcel OD-3 column, *n*-hexane/2-propanol = 97:3 (v/v), 1.0 mL/min, 254 nm, r.t

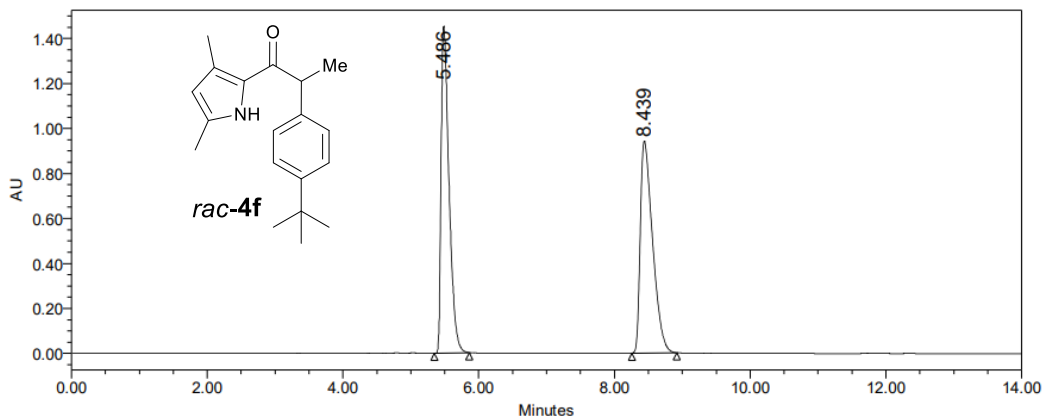

Channel: W2489 ChA; Processed Channel: W2489 ChA 254nm; Result Id: 4622; Processing Method: 9703 OD 3 254

**Processed Channel Descr.: W2489 ChA 254nm**

|   | Processed Channel Descr. | RT    | Area     | % Area | Height  |
|---|--------------------------|-------|----------|--------|---------|
| 1 | W2489 ChA 254nm          | 5.486 | 11791631 | 49.93  | 1451832 |
| 2 | W2489 ChA 254nm          | 8.439 | 11827051 | 50.07  | 942572  |

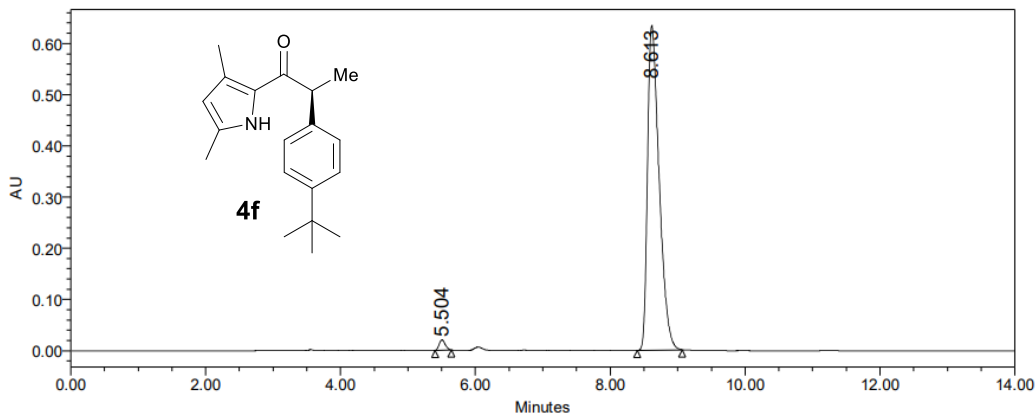

Channel: W2489 ChA; Processed Channel: W2489 ChA 254nm; Result Id: 4609; Processing Method: 9703 OD 3 254

**Processed Channel Descr.: W2489 ChA 254nm**

|   | Processed Channel Descr. | RT    | Area    | % Area | Height |
|---|--------------------------|-------|---------|--------|--------|
| 1 | W2489 ChA 254nm          | 5.504 | 126108  | 1.63   | 20108  |
| 2 | W2489 ChA 254nm          | 8.613 | 7602735 | 98.37  | 633704 |

Daicel Chiralcel OD-3 column, *n*-hexane/2-propanol = 97:3 (v/v), 1.0 mL/min, 254 nm, r.t

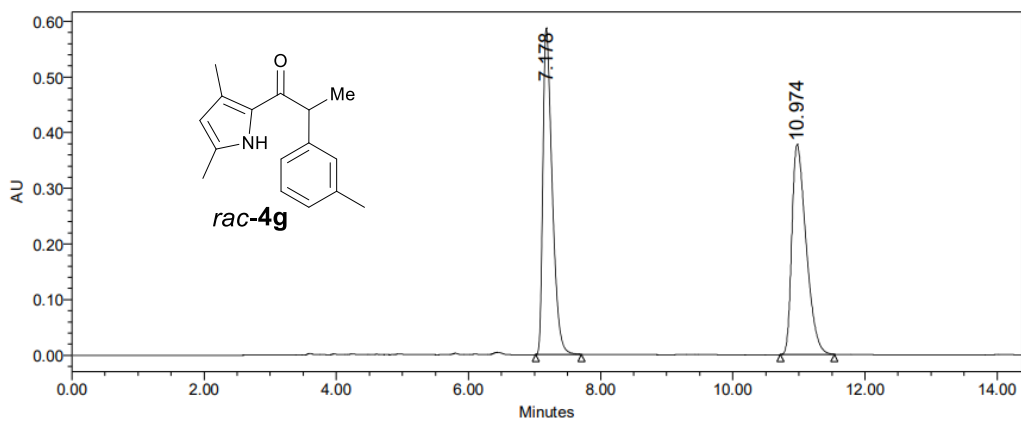

Channel: W2489 ChA; Processed Channel: W2489 ChA 254nm; Result Id: 1900; Processing Method: 9703 OD3 254

**Processed Channel Descr.: W2489 ChA 254nm**

|   | Processed Channel Descr. | RT     | Area    | % Area | Height |
|---|--------------------------|--------|---------|--------|--------|
| 1 | W2489 ChA 254nm          | 7.178  | 5715077 | 50.14  | 586375 |
| 2 | W2489 ChA 254nm          | 10.974 | 5682916 | 49.86  | 377495 |

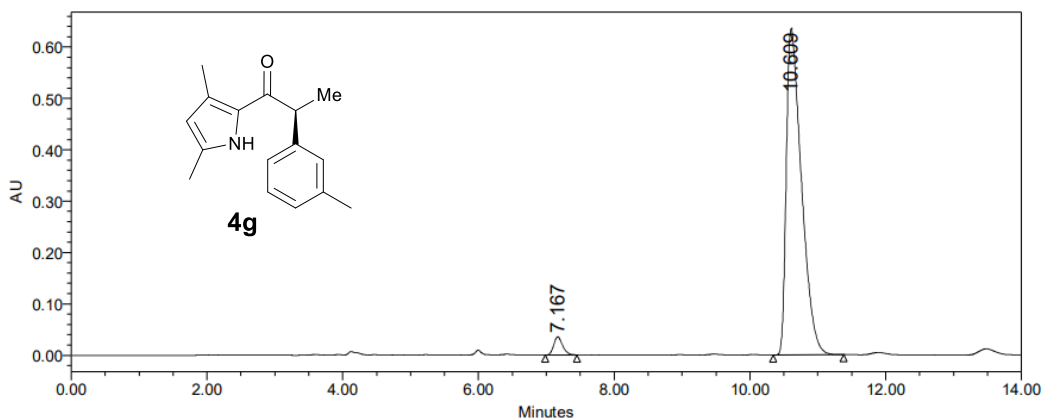

Channel: W2489 ChA; Processed Channel: W2489 ChA 254nm; Result Id: 4957; Processing Method: 9703 OD3 254

**Processed Channel Descr.: W2489 ChA 254nm**

|   | Processed Channel Descr. | RT     | Area    | % Area | Height |
|---|--------------------------|--------|---------|--------|--------|
| 1 | W2489 ChA 254nm          | 7.167  | 324713  | 3.19   | 35453  |
| 2 | W2489 ChA 254nm          | 10.609 | 9863358 | 96.81  | 635795 |



Daicel Chiralcel OD-3 column, *n*-hexane/2-propanol = 97:3 (v/v), 1.0 mL/min, 254 nm, r.t

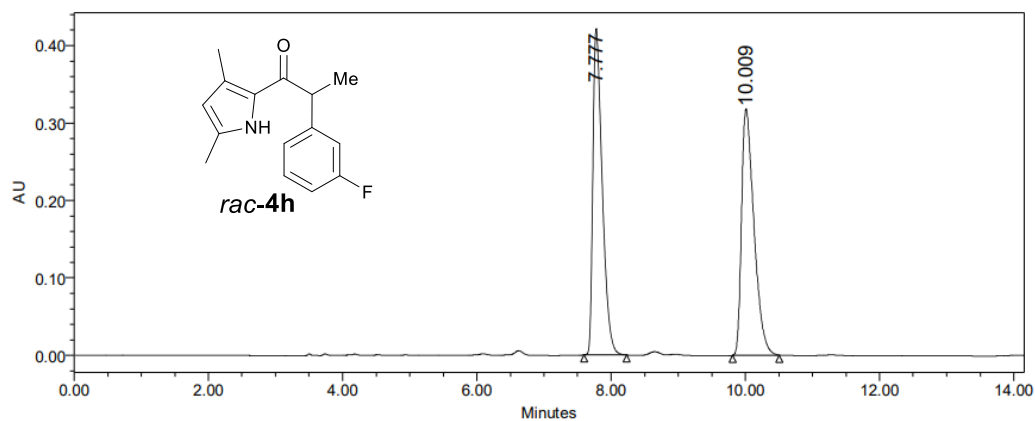

Channel: W2489 ChA; Processed Channel: W2489 ChA 243nm; Result Id: 2586; Processing Method: 9703 OD 3 254

**Processed Channel Descr.: W2489 ChA 243nm**

|   | Processed Channel Descr. | RT     | Area    | % Area | Height |
|---|--------------------------|--------|---------|--------|--------|
| 1 | W2489 ChA 243nm          | 7.777  | 4069258 | 49.84  | 420645 |
| 2 | W2489 ChA 243nm          | 10.009 | 4094593 | 50.16  | 317890 |

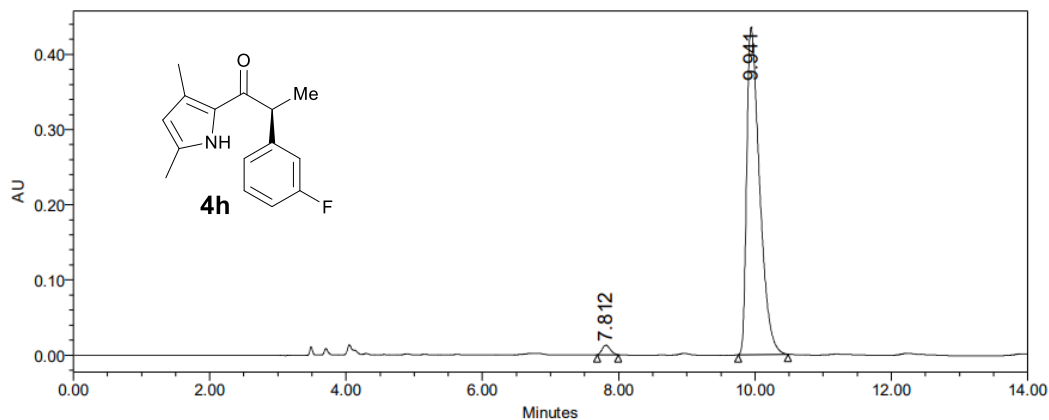

Channel: W2489 ChA; Processed Channel: W2489 ChA 243nm; Result Id: 2590; Processing Method: 9703 OD 3 254

**Processed Channel Descr.: W2489 ChA 243nm**

|   | Processed Channel Descr. | RT    | Area    | % Area | Height |
|---|--------------------------|-------|---------|--------|--------|
| 1 | W2489 ChA 243nm          | 7.812 | 104108  | 1.79   | 12616  |
| 2 | W2489 ChA 243nm          | 9.941 | 5698539 | 98.21  | 435055 |

Daicel Chiralcel OD-3 column, *n*-hexane/2-propanol = 95:5 (v/v), 1.0 mL/min, 254 nm, r.t

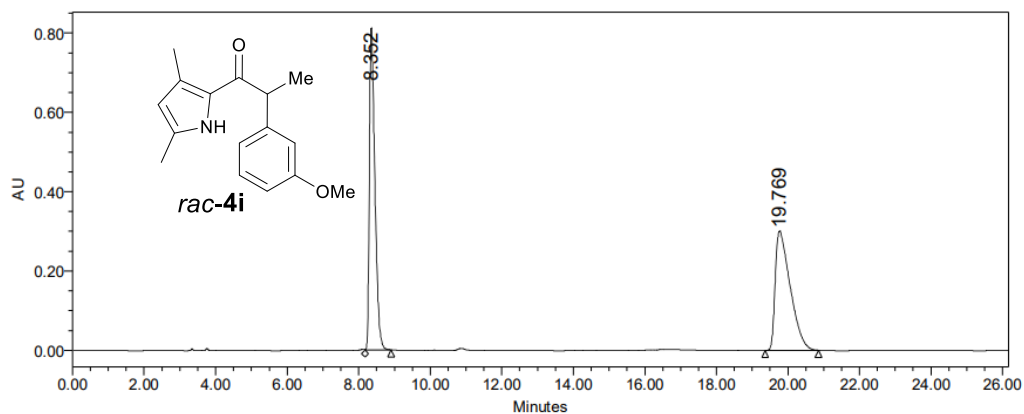

Channel: W2489 ChA; Processed Channel: W2489 ChA 254nm; Result Id: 2235; Processing Method: 9505 254 OD 3

**Processed Channel Descr.: W2489 ChA 254nm**

|   | Processed Channel Descr. | RT     | Area    | % Area | Height |
|---|--------------------------|--------|---------|--------|--------|
| 1 | W2489 ChA 254nm          | 8.352  | 8656147 | 49.73  | 811074 |
| 2 | W2489 ChA 254nm          | 19.769 | 8751490 | 50.27  | 301267 |

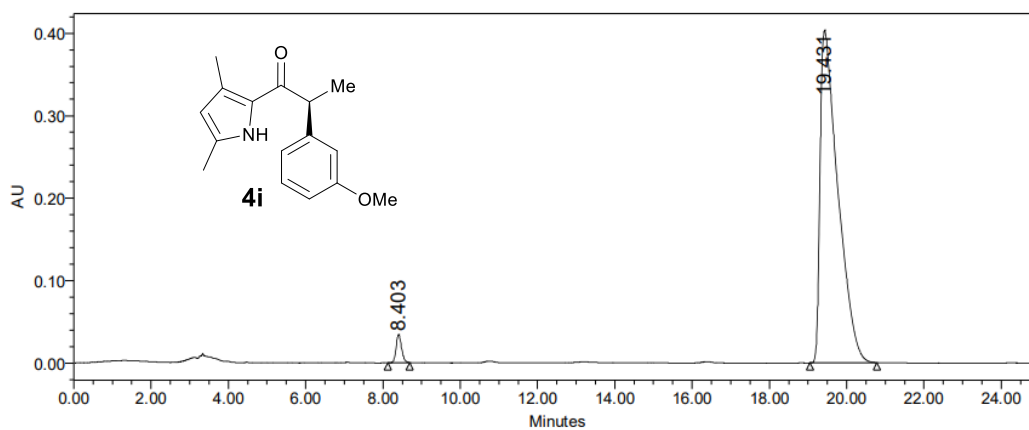

Channel: W2489 ChA; Processed Channel: W2489 ChA 254nm; Result Id: 2245; Processing Method: 9505 254 OD 3

**Processed Channel Descr.: W2489 ChA 254nm**

|   | Processed Channel Descr. | RT     | Area     | % Area | Height |
|---|--------------------------|--------|----------|--------|--------|
| 1 | W2489 ChA 254nm          | 8.403  | 330836   | 2.51   | 33889  |
| 2 | W2489 ChA 254nm          | 19.431 | 12874931 | 97.49  | 403566 |

Daicel Chiralcel OD-3 column, *n*-hexane/2-propanol = 97:3 (v/v), 1.0 mL/min, 254 nm, r.t

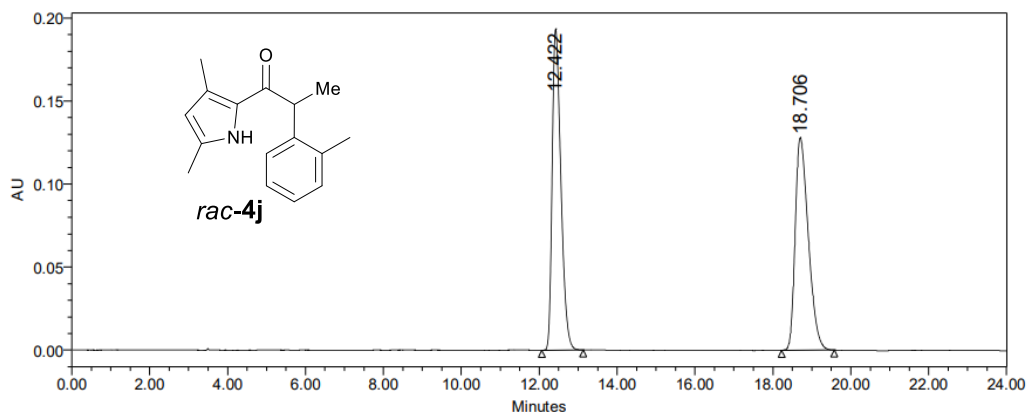

Channel: W2489 ChA; Processed Channel: W2489 ChA 254nm; Result Id: 4997; Processing Method: 9703 OD3 254

**Processed Channel Descr.: W2489 ChA 254nm**

|   | Processed Channel Descr. | RT     | Area    | % Area | Height |
|---|--------------------------|--------|---------|--------|--------|
| 1 | W2489 ChA 254nm          | 12.422 | 2994202 | 50.00  | 193343 |
| 2 | W2489 ChA 254nm          | 18.706 | 2994640 | 50.00  | 128058 |

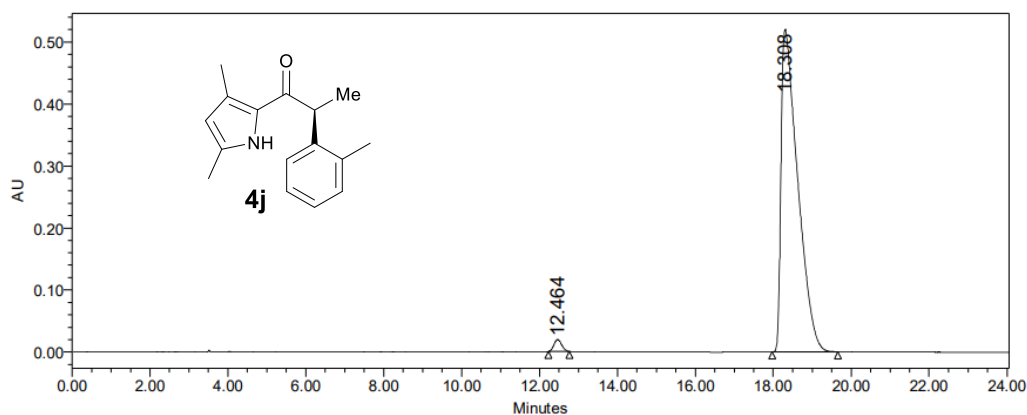

Channel: W2489 ChA; Processed Channel: W2489 ChA 254nm; Result Id: 5001; Processing Method: 9703 OD3 254

**Processed Channel Descr.: W2489 ChA 254nm**

|   | Processed Channel Descr. | RT     | Area     | % Area | Height |
|---|--------------------------|--------|----------|--------|--------|
| 1 | W2489 ChA 254nm          | 12.464 | 271105   | 1.73   | 19321  |
| 2 | W2489 ChA 254nm          | 18.308 | 15420049 | 98.27  | 519946 |

Daicel Chiralcel OD-3 column, *n*-hexane/2-propanol = 97:3 (v/v), 1.0 mL/min, 254 nm, r.t

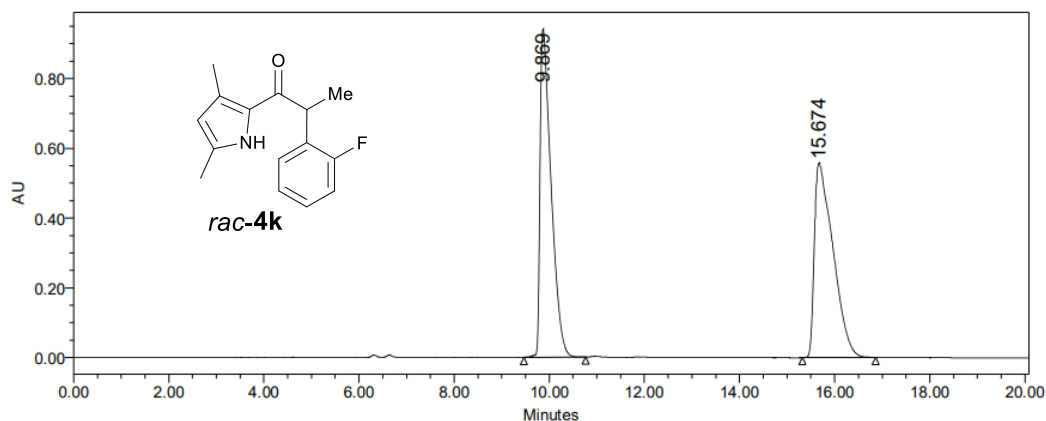

Channel: W2489 ChA; Processed Channel: W2489 ChA 254nm; Result Id: 4953; Processing Method: 9703 OD3 254

**Processed Channel Descr.: W2489 ChA 254nm**

|   | Processed Channel Descr. | RT     | Area     | % Area | Height |
|---|--------------------------|--------|----------|--------|--------|
| 1 | W2489 ChA 254nm          | 9.869  | 15155960 | 49.97  | 941677 |
| 2 | W2489 ChA 254nm          | 15.674 | 15176797 | 50.03  | 558223 |

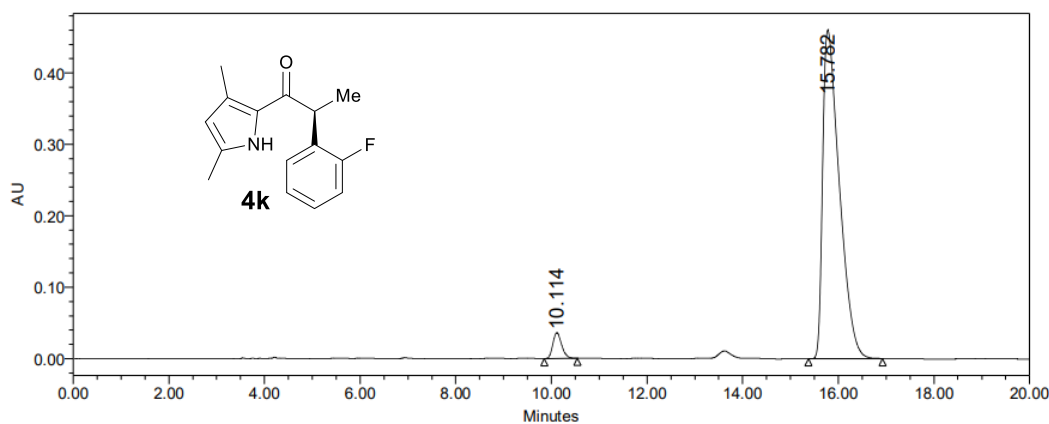

Channel: W2489 ChA; Processed Channel: W2489 ChA 254nm; Result Id: 4955; Processing Method: 9703 OD3 254

**Processed Channel Descr.: W2489 ChA 254nm**

|   | Processed Channel Descr. | RT     | Area     | % Area | Height |
|---|--------------------------|--------|----------|--------|--------|
| 1 | W2489 ChA 254nm          | 10.114 | 464872   | 4.01   | 36176  |
| 2 | W2489 ChA 254nm          | 15.782 | 11121322 | 95.99  | 460505 |

Daicel Chiralcel OD-3 column, *n*-hexane/2-propanol = 97:3 (v/v), 1.0 mL/min, 254 nm, r.t

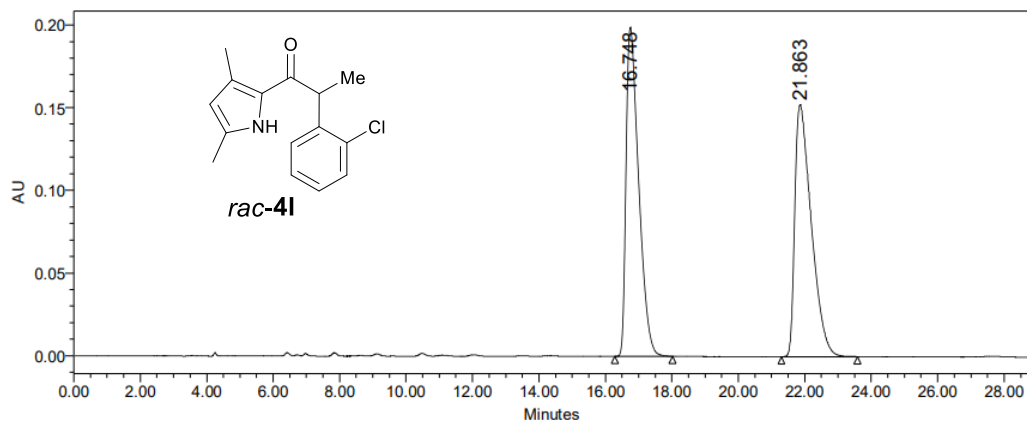

Channel: W2489 ChA; Processed Channel: W2489 ChA 254nm; Result Id: 4947; Processing Method: 9703 OD3 254

**Processed Channel Descr.: W2489 ChA 254nm**

|   | Processed Channel Descr. | RT     | Area    | % Area | Height |
|---|--------------------------|--------|---------|--------|--------|
| 1 | W2489 ChA 254nm          | 16.748 | 5231924 | 49.94  | 198813 |
| 2 | W2489 ChA 254nm          | 21.863 | 5245068 | 50.06  | 152491 |

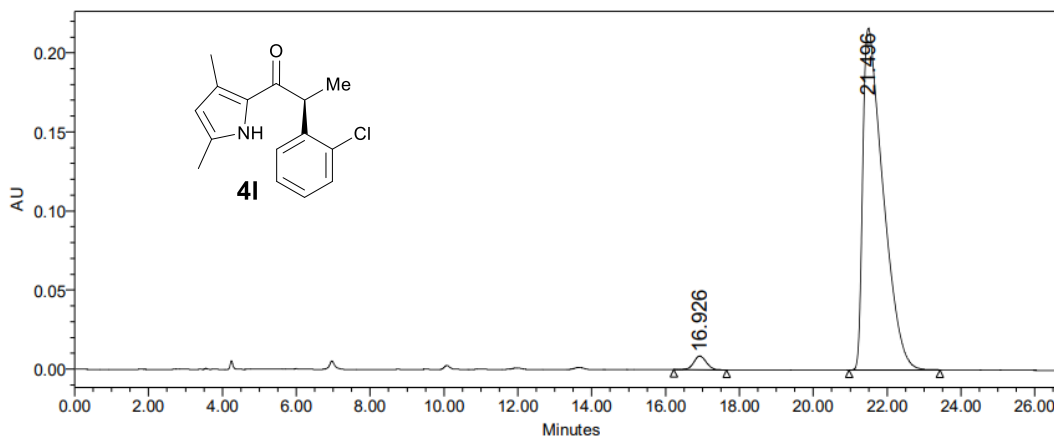

Channel: W2489 ChA; Processed Channel: W2489 ChA 254nm; Result Id: 4950; Processing Method: 9703 OD3 254

**Processed Channel Descr.: W2489 ChA 254nm**

|   | Processed Channel Descr. | RT     | Area    | % Area | Height |
|---|--------------------------|--------|---------|--------|--------|
| 1 | W2489 ChA 254nm          | 16.926 | 208543  | 2.47   | 8716   |
| 2 | W2489 ChA 254nm          | 21.496 | 8226521 | 97.53  | 216030 |

Daicel Chiralcel OD-3 column, *n*-hexane/2-propanol = 97:3 (v/v), 1.0 mL/min, 254 nm, r.t

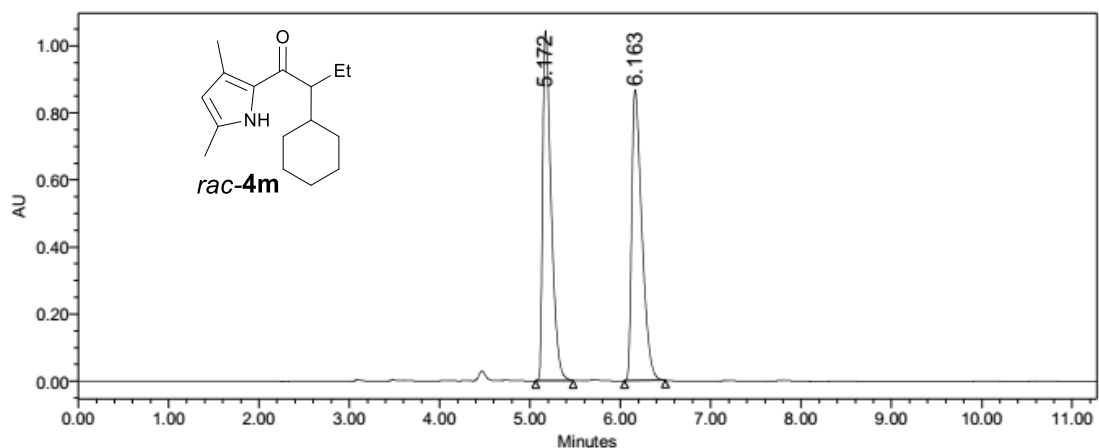

Channel: W2489 ChA; Processed Channel: W2489 ChA 243nm; Result Id: 2595; Processing Method: 9703 OD 3 254

**Processed Channel Descr.: W2489 ChA 243nm**

|   | Processed Channel Descr. | RT    | Area    | % Area | Height  |
|---|--------------------------|-------|---------|--------|---------|
| 1 | W2489 ChA 243nm          | 5.172 | 6727462 | 50.04  | 1043629 |
| 2 | W2489 ChA 243nm          | 6.163 | 6716129 | 49.96  | 867711  |

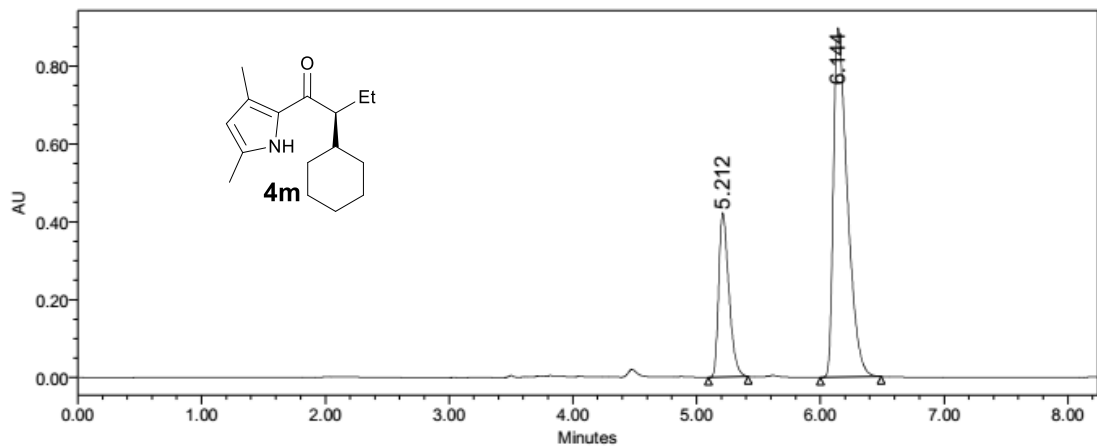

Channel: W2489 ChA; Processed Channel: W2489 ChA 243nm; Result Id: 2599; Processing Method: 9703 OD 3 254

**Processed Channel Descr.: W2489 ChA 243nm**

|   | Processed Channel Descr. | RT    | Area    | % Area | Height |
|---|--------------------------|-------|---------|--------|--------|
| 1 | W2489 ChA 243nm          | 5.212 | 2417970 | 25.62  | 421302 |
| 2 | W2489 ChA 243nm          | 6.144 | 7018640 | 74.38  | 896529 |

Daicel Chiralcel OD-3 column, *n*-hexane/2-propanol = 97:3 (v/v), 1.0 mL/min, 254 nm, r.t

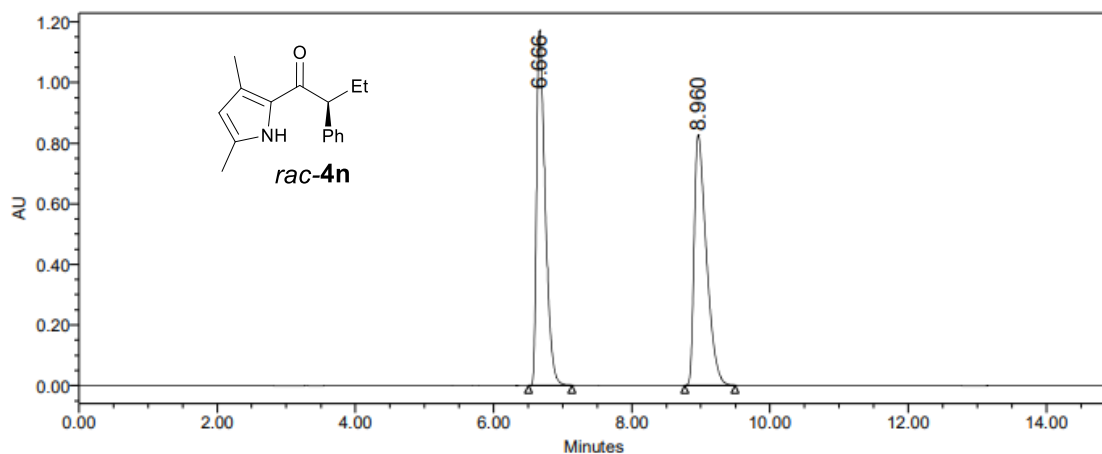

Channel: W2489 ChA; Processed Channel: W2489 ChA 254nm; Result Id: 5204; Processing Method: 9703 OD 3 243

**Processed Channel Descr.: W2489 ChA 254nm**

|   | Processed Channel Descr. | RT    | Area     | % Area | Height  |
|---|--------------------------|-------|----------|--------|---------|
| 1 | W2489 ChA 254nm          | 6.666 | 10141090 | 49.92  | 1170336 |
| 2 | W2489 ChA 254nm          | 8.960 | 10172279 | 50.08  | 826857  |

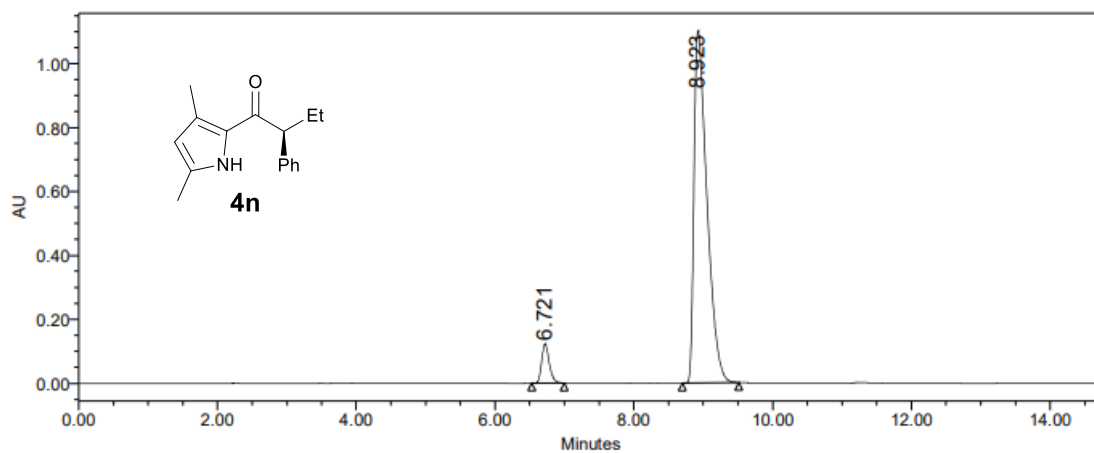

Channel: W2489 ChA; Processed Channel: W2489 ChA 254nm; Result Id: 5199; Processing Method: 9703 OD 3 254

**Processed Channel Descr.: W2489 ChA 254nm**

|   | Processed Channel Descr. | RT    | Area     | % Area | Height  |
|---|--------------------------|-------|----------|--------|---------|
| 1 | W2489 ChA 254nm          | 6.721 | 935374   | 6.16   | 123127  |
| 2 | W2489 ChA 254nm          | 8.923 | 14243407 | 93.84  | 1101217 |

Daicel Chiralcel AD-3 column, *n*-hexane/2-propanol = 97:3 (v/v), 1.0 mL/min, 254 nm, r.t

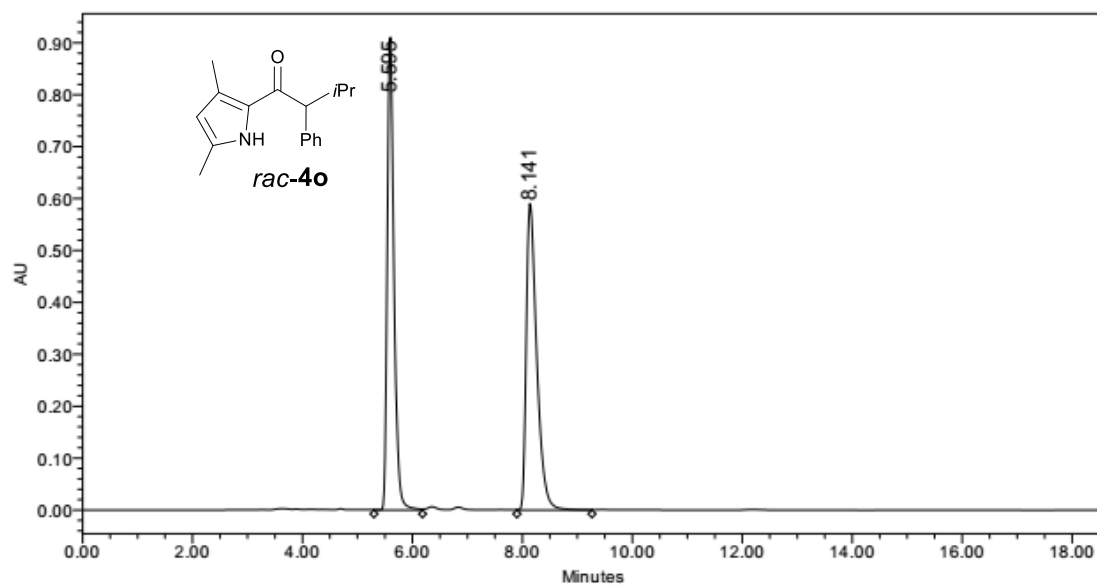

|   | RT (min) | Area ( $\mu\text{V}\cdot\text{sec}$ ) | % Area | Height ( $\mu\text{V}$ ) | % Height |
|---|----------|---------------------------------------|--------|--------------------------|----------|
| 1 | 5.595    | 7774213                               | 49.93  | 911558                   | 60.59    |
| 2 | 8.141    | 7794681                               | 50.07  | 593024                   | 39.41    |

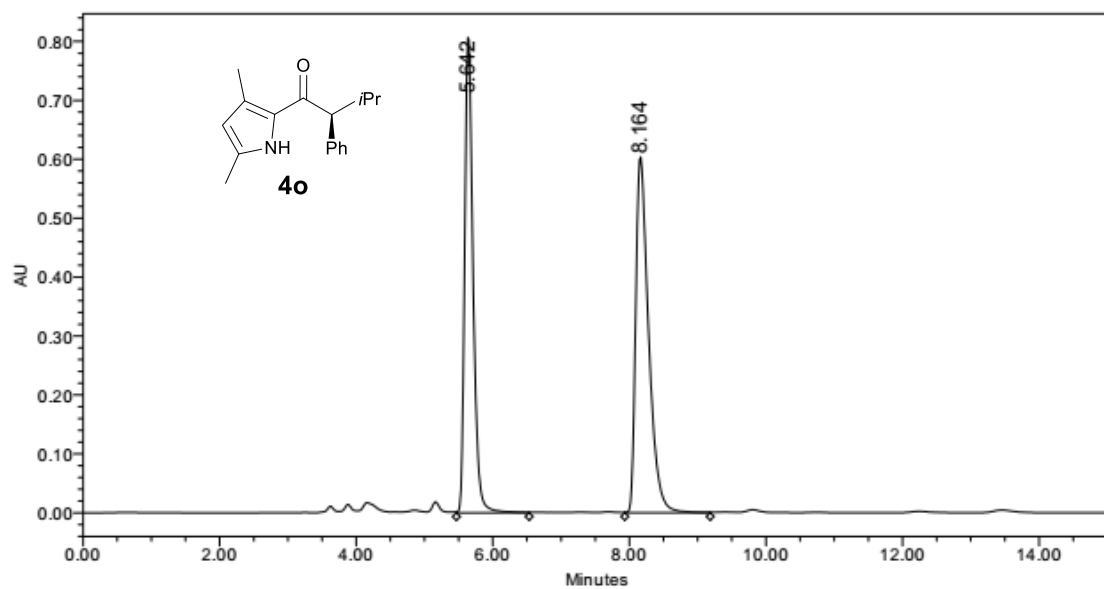

|   | RT (min) | Area ( $\mu\text{V}\cdot\text{sec}$ ) | % Area | Height ( $\mu\text{V}$ ) | % Height |
|---|----------|---------------------------------------|--------|--------------------------|----------|
| 1 | 5.642    | 6891583                               | 46.56  | 813756                   | 57.40    |
| 2 | 8.164    | 7910243                               | 53.44  | 603995                   | 42.60    |



Daicel Chiralcel OD-3 column, *n*-hexane/2-propanol = 97:3 (v/v), 1.0 mL/min, 254 nm, r.t

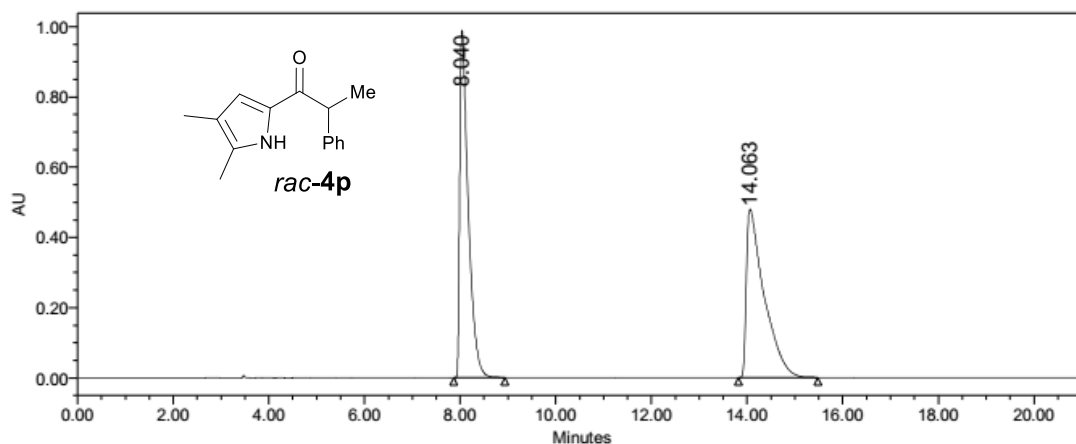

Channel: W2489 ChA; Processed Channel: W2489 ChA 254nm; Result Id: 3281; Processing Method: 9703 OD3 254

**Processed Channel Descr.: W2489 ChA 254nm**

|   | Processed Channel Descr. | RT     | Area     | % Area | Height |
|---|--------------------------|--------|----------|--------|--------|
| 1 | W2489 ChA 254nm          | 8.040  | 12384154 | 49.91  | 988624 |
| 2 | W2489 ChA 254nm          | 14.063 | 12427905 | 50.09  | 479660 |

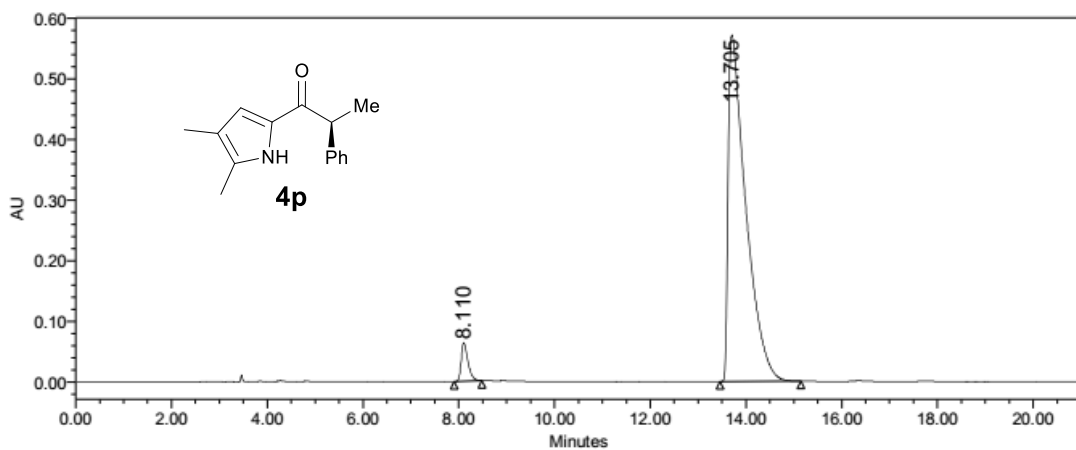

Channel: W2489 ChA; Processed Channel: W2489 ChA 254nm; Result Id: 3284; Processing Method: 9703 OD 3 254

**Processed Channel Descr.: W2489 ChA 254nm**

|   | Processed Channel Descr. | RT     | Area     | % Area | Height |
|---|--------------------------|--------|----------|--------|--------|
| 1 | W2489 ChA 254nm          | 8.110  | 632973   | 4.13   | 63302  |
| 2 | W2489 ChA 254nm          | 13.705 | 14679875 | 95.87  | 571502 |

Daicel Chiralcel OD-3 column, *n*-hexane/2-propanol = 99:1 (v/v), 1.0 mL/min, 254 nm, r.t

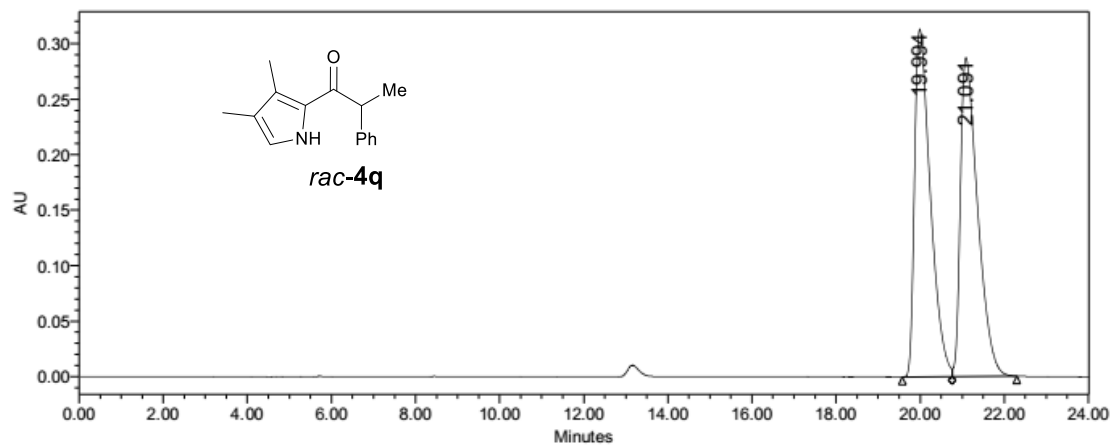

Channel: W2489 ChA; Processed Channel: W2489 ChA 254nm; Result Id: 5014; Processing Method: 9703 OD3 254

**Processed Channel Descr.: W2489 ChA 254nm**

|   | Processed Channel Descr. | RT     | Area    | % Area | Height |
|---|--------------------------|--------|---------|--------|--------|
| 1 | W2489 ChA 254nm          | 19.994 | 8158517 | 49.96  | 313431 |
| 2 | W2489 ChA 254nm          | 21.091 | 8171415 | 50.04  | 287417 |

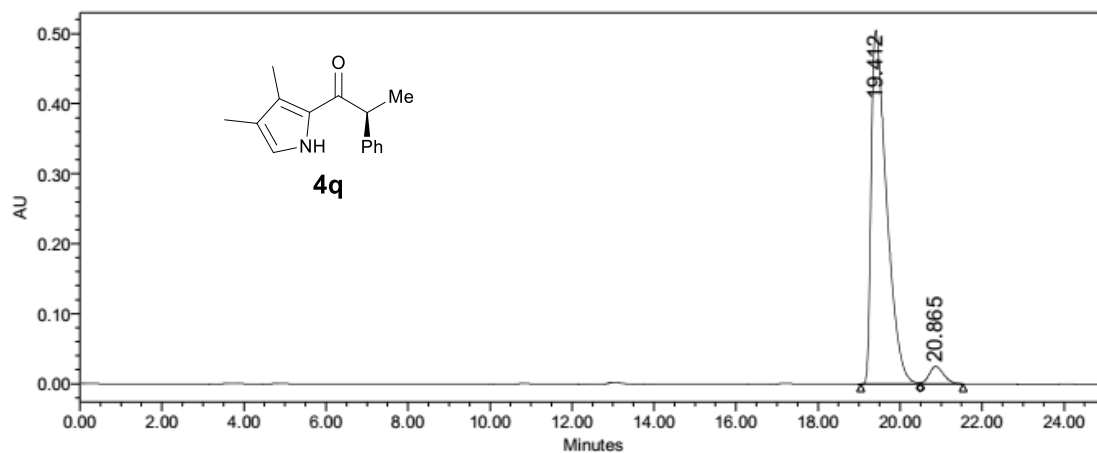

Channel: W2489 ChA; Processed Channel: W2489 ChA 254nm; Result Id: 5016; Processing Method: 9901 OD 3 254

**Processed Channel Descr.: W2489 ChA 254nm**

|   | Processed Channel Descr. | RT     | Area     | % Area | Height |
|---|--------------------------|--------|----------|--------|--------|
| 1 | W2489 ChA 254nm          | 19.412 | 13123373 | 95.51  | 505198 |
| 2 | W2489 ChA 254nm          | 20.865 | 616629   | 4.49   | 24975  |

Daicel Chiralcel OD-3 column, *n*-hexane/2-propanol = 97:3 (v/v), 1.0 mL/min, 254 nm, r.t

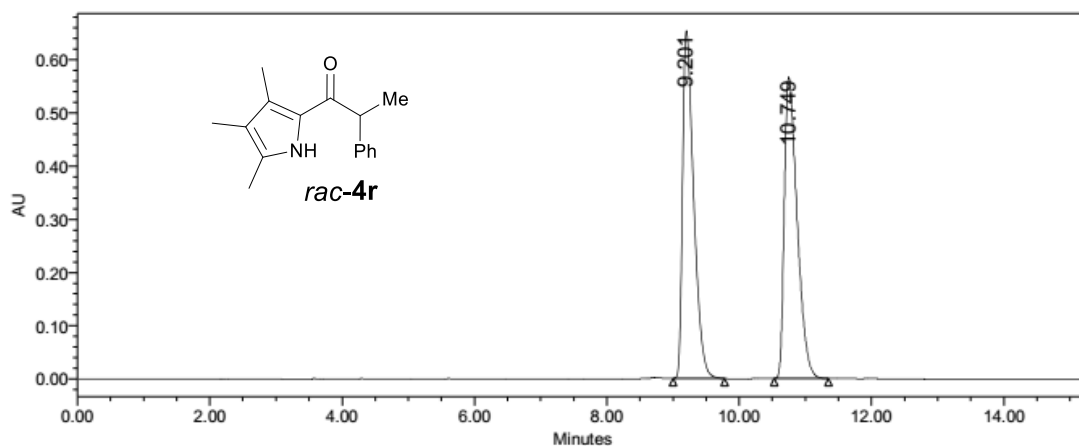

Channel: W2489 ChA; Processed Channel: W2489 ChA 254nm; Result Id: 2360; Processing Method: 9703 OD 3 254

**Processed Channel Descr.: W2489 ChA 254nm**

|   | Processed Channel Descr. | RT     | Area    | % Area | Height |
|---|--------------------------|--------|---------|--------|--------|
| 1 | W2489 ChA 254nm          | 9.201  | 7609197 | 50.07  | 653735 |
| 2 | W2489 ChA 254nm          | 10.749 | 7586917 | 49.93  | 567170 |

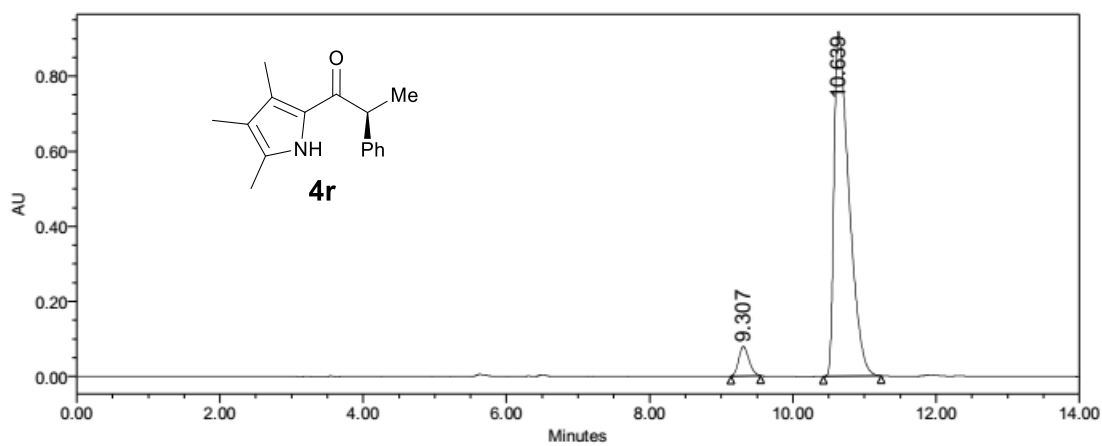

Channel: W2489 ChA; Processed Channel: W2489 ChA 254nm; Result Id: 2363; Processing Method: 9703 OD3 254

**Processed Channel Descr.: W2489 ChA 254nm**

|   | Processed Channel Descr. | RT     | Area     | % Area | Height |
|---|--------------------------|--------|----------|--------|--------|
| 1 | W2489 ChA 254nm          | 9.307  | 787435   | 5.59   | 78342  |
| 2 | W2489 ChA 254nm          | 10.639 | 13288176 | 94.41  | 918483 |

Daicel Chiralcel OD-3 column, *n*-hexane/2-propanol = 99:1 (v/v), 1.0 mL/min, 254 nm, r.t

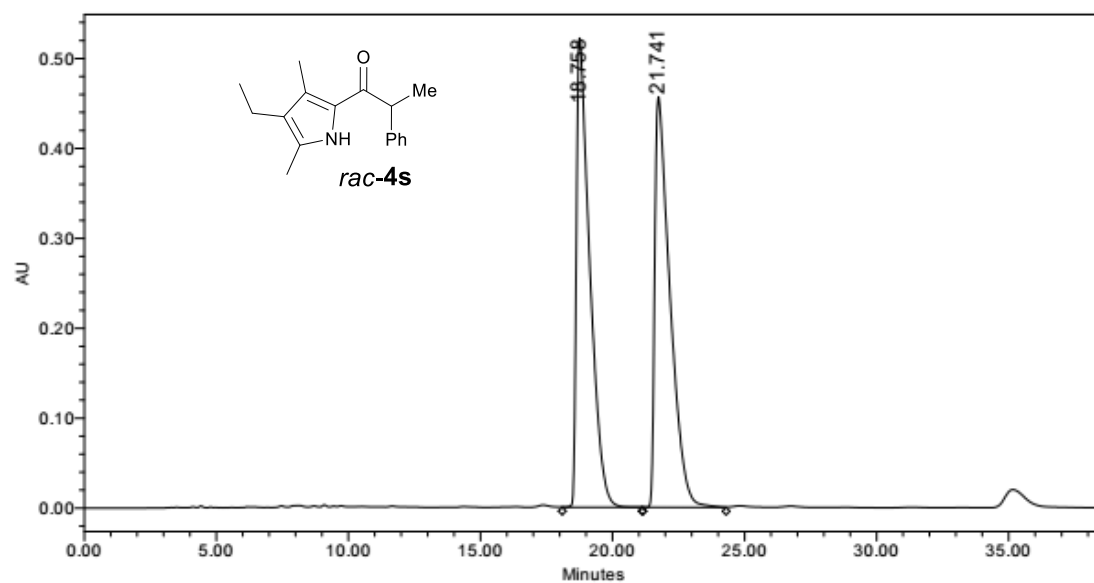

|   | RT (min) | Area (μV*sec) | % Area | Height (μV) | % Height |
|---|----------|---------------|--------|-------------|----------|
| 1 | 18.758   | 18296022      | 49.97  | 522500      | 53.37    |
| 2 | 21.741   | 18319879      | 50.03  | 456513      | 46.63    |

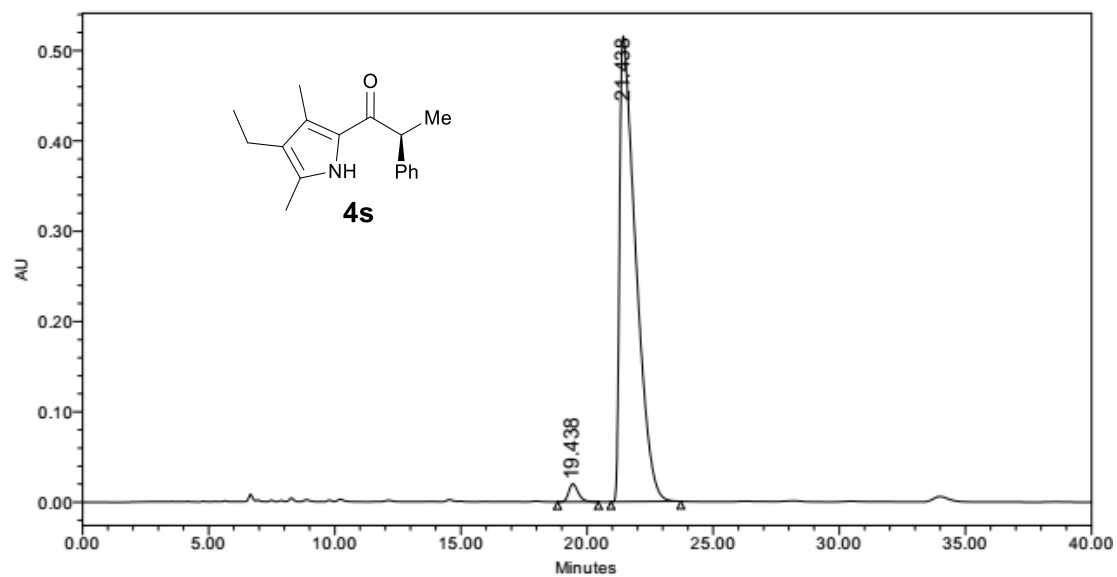

|   | RT (min) | Area (μV*sec) | % Area | Height (μV) | % Height |
|---|----------|---------------|--------|-------------|----------|
| 1 | 19.438   | 519288        | 2.21   | 19779       | 3.70     |
| 2 | 21.438   | 23006321      | 97.79  | 515216      | 96.30    |

Daicel Chiralcel AD-3 column, *n*-hexane/2-propanol = 97:3 (v/v), 1.0 mL/min, 254 nm, r.t

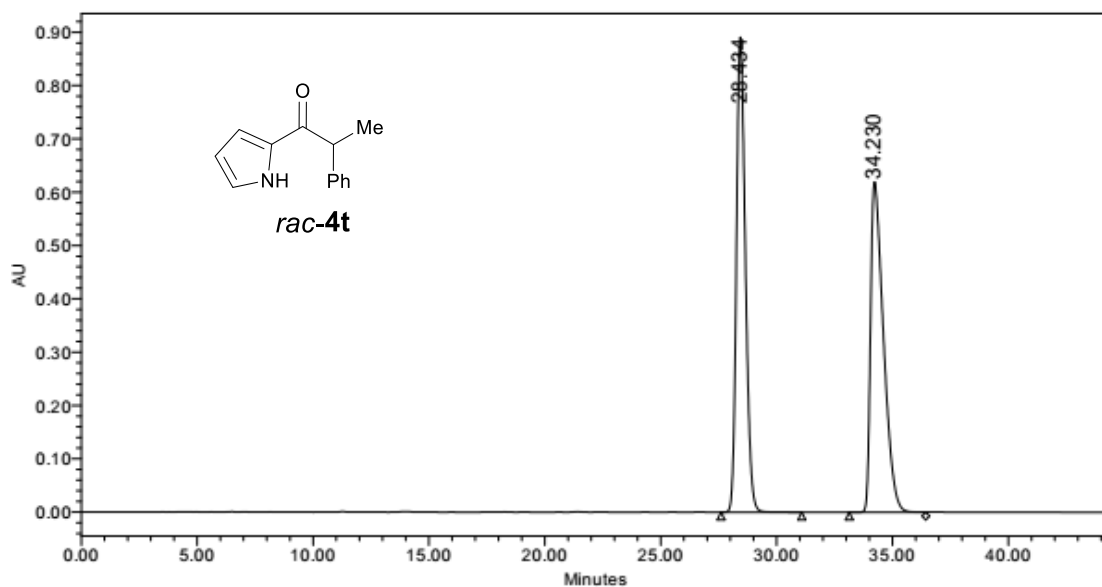

|   | RT (min) | Area ( $\mu\text{V}\cdot\text{sec}$ ) | % Area | Height ( $\mu\text{V}$ ) | % Height |
|---|----------|---------------------------------------|--------|--------------------------|----------|
| 1 | 28.434   | 23975815                              | 49.98  | 890673                   | 58.99    |
| 2 | 34.230   | 23994033                              | 50.02  | 619162                   | 41.01    |

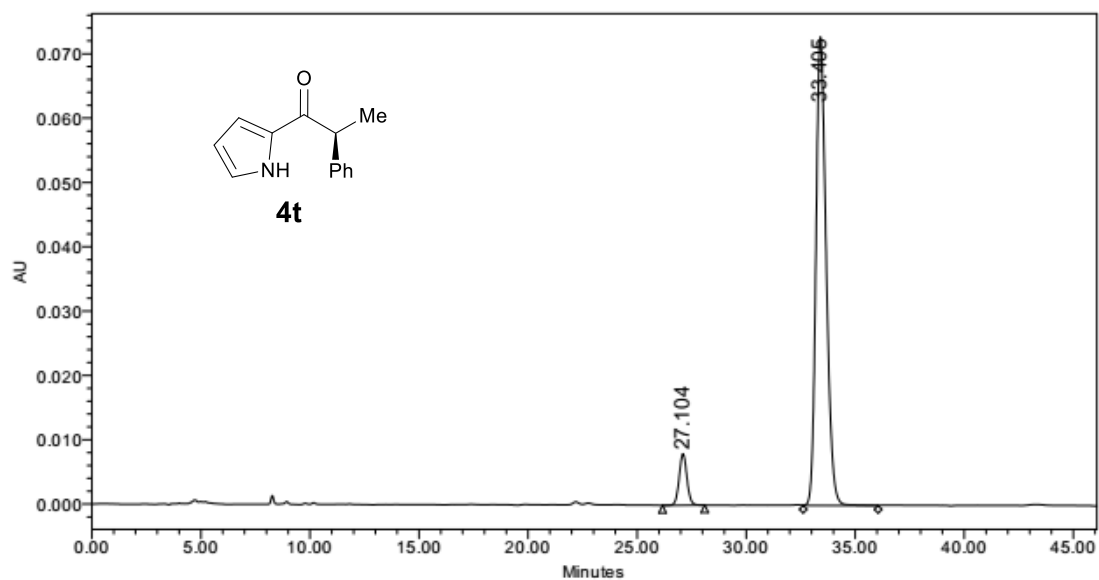

|   | RT (min) | Area ( $\mu\text{V}\cdot\text{sec}$ ) | % Area | Height ( $\mu\text{V}$ ) | % Height |
|---|----------|---------------------------------------|--------|--------------------------|----------|
| 1 | 27.104   | 199401                                | 7.73   | 7996                     | 9.89     |
| 2 | 33.405   | 2378576                               | 92.27  | 72843                    | 90.11    |

Daicel Chiralcel OD-3 column, *n*-hexane/2-propanol = 97:3 (v/v), 1.0 mL/min, 254 nm, r.t

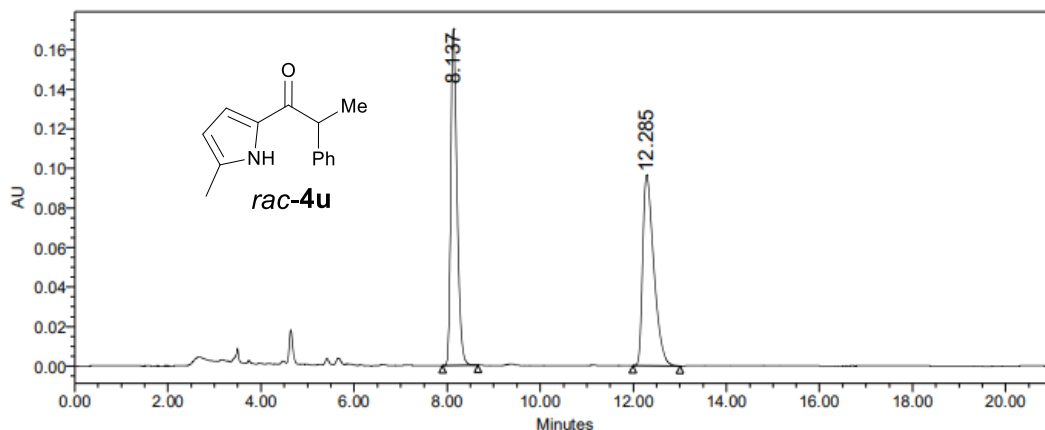

Channel: W2489 ChA; Processed Channel: W2489 ChA 254nm; Result Id: 5197; Processing Method: 9703 OD 3 254

**Processed Channel Descr.: W2489 ChA 254nm**

|   | Processed Channel Descr. | RT     | Area    | % Area | Height |
|---|--------------------------|--------|---------|--------|--------|
| 1 | W2489 ChA 254nm          | 8.137  | 1599096 | 50.06  | 170342 |
| 2 | W2489 ChA 254nm          | 12.285 | 1595050 | 49.94  | 96365  |

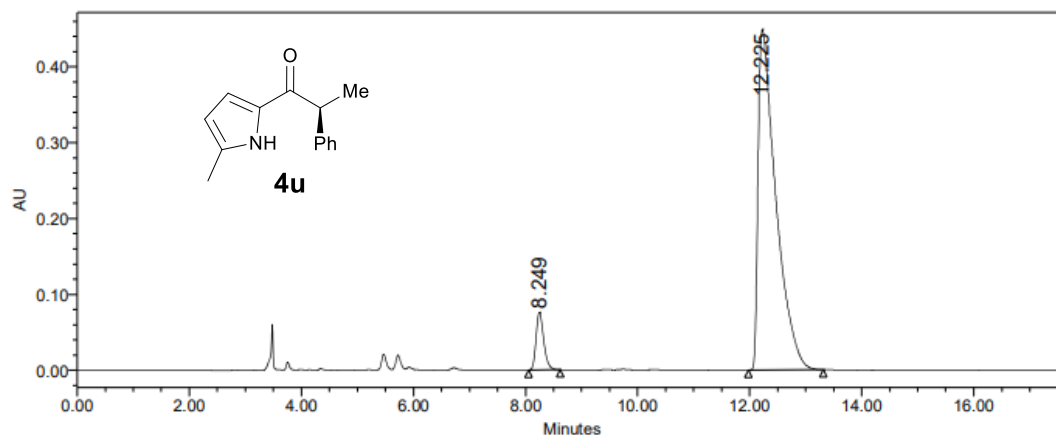

Channel: W2489 ChA; Processed Channel: W2489 ChA 254nm; Result Id: 5176; Processing Method: 9703 OD3 254

**Processed Channel Descr.: W2489 ChA 254nm**

|   | Processed Channel Descr. | RT     | Area    | % Area | Height |
|---|--------------------------|--------|---------|--------|--------|
| 1 | W2489 ChA 254nm          | 8.249  | 719610  | 6.77   | 75966  |
| 2 | W2489 ChA 254nm          | 12.225 | 9904893 | 93.23  | 448702 |

Daicel Chiralcel OD-3 column, *n*-hexane/2-propanol = 97:3 (v/v), 1.0 mL/min, 254 nm, r.t

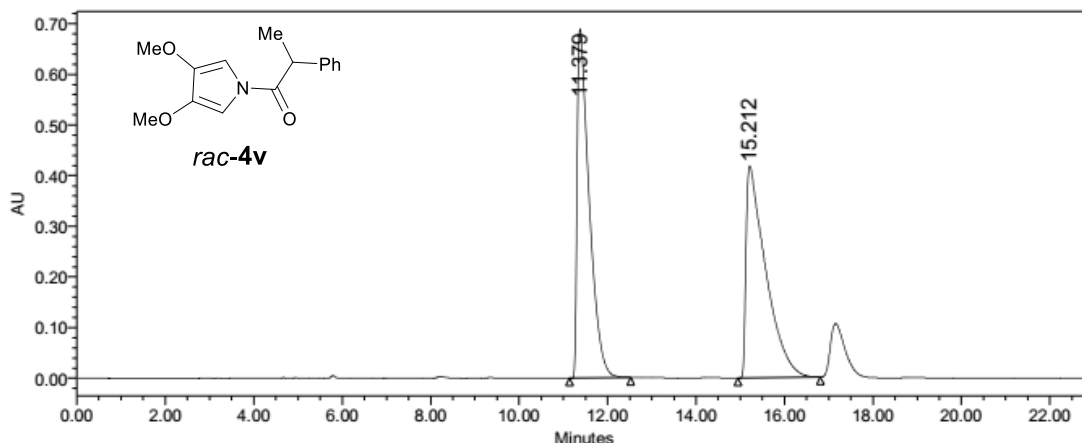

Channel: W2489 ChA; Processed Channel: W2489 ChA 254nm; Result Id: 5018; Processing Method: 9703 OD3 254

**Processed Channel Descr.: W2489 ChA 254nm**

|   | Processed Channel Descr. | RT     | Area     | % Area | Height |
|---|--------------------------|--------|----------|--------|--------|
| 1 | W2489 ChA 254nm          | 11.379 | 13014096 | 50.05  | 689246 |
| 2 | W2489 ChA 254nm          | 15.212 | 12986094 | 49.95  | 417979 |

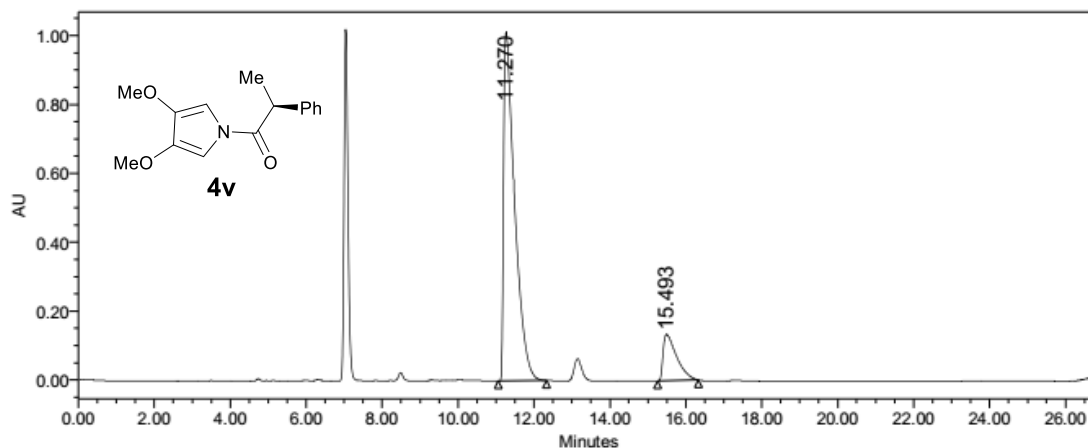

Channel: W2489 ChA; Processed Channel: W2489 ChA 254nm; Result Id: 5022; Processing Method: 9703 OD3 254

**Processed Channel Descr.: W2489 ChA 254nm**

|   | Processed Channel Descr. | RT     | Area     | % Area | Height  |
|---|--------------------------|--------|----------|--------|---------|
| 1 | W2489 ChA 254nm          | 11.270 | 20417225 | 85.90  | 1014136 |
| 2 | W2489 ChA 254nm          | 15.493 | 3352216  | 14.10  | 135237  |

Daicel Chiralcel OD-3 column, *n*-hexane/2-propanol = 97:3 (v/v), 1.0 mL/min, 254 nm, r.t

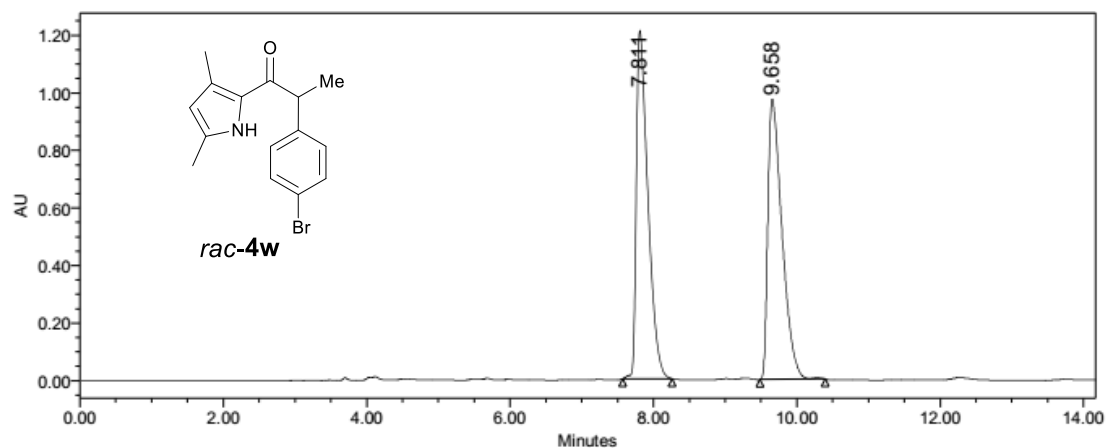

Channel: W2489 ChA; Processed Channel: W2489 ChA 254nm; Result Id: 2692; Processing Method: 9703 OD 3 254

**Processed Channel Descr.: W2489 ChA 254nm**

|   | Processed Channel Descr. | RT    | Area     | % Area | Height  |
|---|--------------------------|-------|----------|--------|---------|
| 1 | W2489 ChA 254nm          | 7.811 | 13485719 | 50.26  | 1210223 |
| 2 | W2489 ChA 254nm          | 9.658 | 13346097 | 49.74  | 974093  |

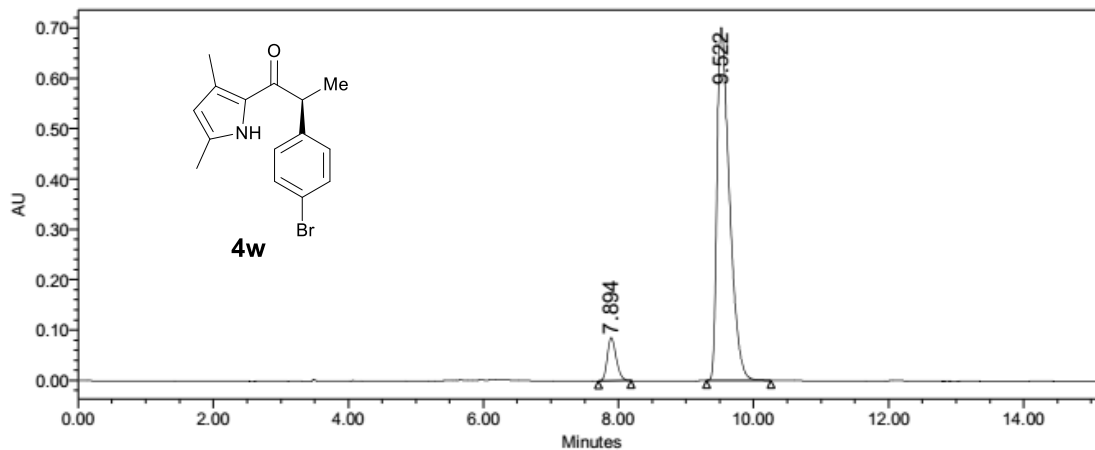

Channel: W2489 ChA; Processed Channel: W2489 ChA 254nm; Result Id: 5008; Processing Method: 9703 OD3 254

**Processed Channel Descr.: W2489 ChA 254nm**

|   | Processed Channel Descr. | RT    | Area    | % Area | Height |
|---|--------------------------|-------|---------|--------|--------|
| 1 | W2489 ChA 254nm          | 7.894 | 786403  | 8.04   | 85875  |
| 2 | W2489 ChA 254nm          | 9.522 | 8990647 | 91.96  | 701320 |



Daicel Chiralcel OD-3 column, *n*-hexane/2-propanol = 97:3 (v/v), 1.0 mL/min, 254 nm, r.t

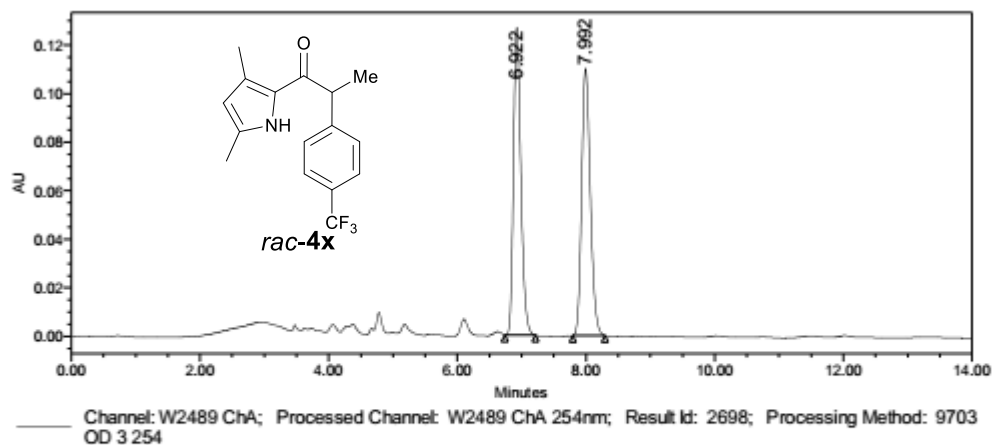

**Processed Channel Descr.: W2489 ChA 254nm**

|   | Processed Channel Descr. | RT    | Area    | % Area | Height |
|---|--------------------------|-------|---------|--------|--------|
| 1 | W2489 ChA 254nm          | 6.922 | 1014626 | 49.72  | 126568 |
| 2 | W2489 ChA 254nm          | 7.992 | 1026039 | 50.28  | 109914 |

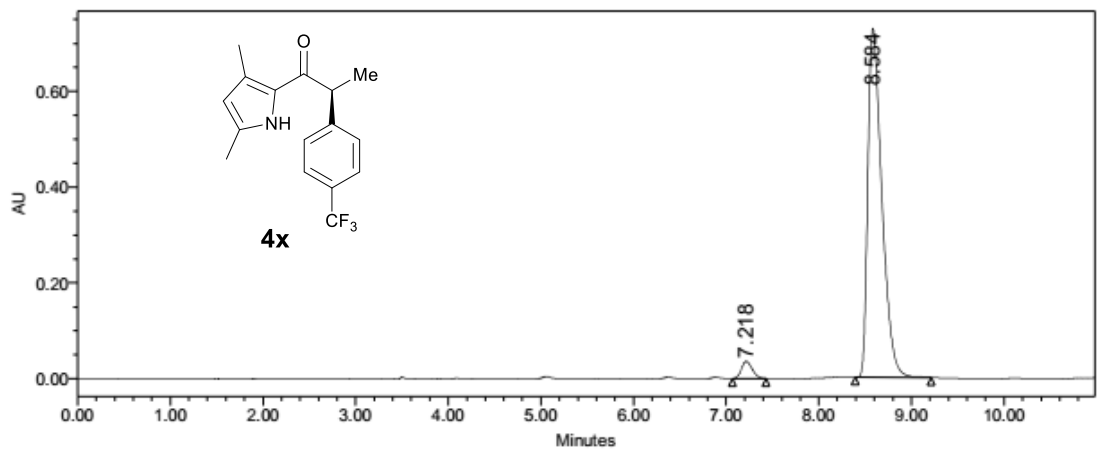

**Processed Channel Descr.: W2489 ChA 254nm**

|   | Processed Channel Descr. | RT    | Area    | % Area | Height |
|---|--------------------------|-------|---------|--------|--------|
| 1 | W2489 ChA 254nm          | 7.218 | 294721  | 3.71   | 35860  |
| 2 | W2489 ChA 254nm          | 8.584 | 7645257 | 96.29  | 727962 |

Daicel Chiralcel OD-3 column, *n*-hexane/2-propanol = 97:3 (v/v), 1.0 mL/min, 254 nm, r.t

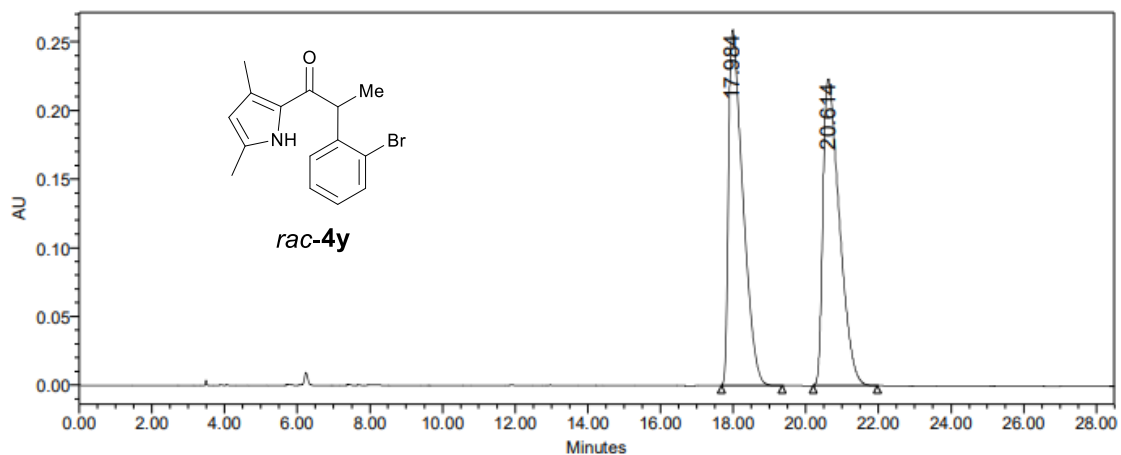

Channel: W2489 ChA; Processed Channel: W2489 ChA 254nm; Result Id: 2855; Processing Method: 9703 OD 3 254

**Processed Channel Descr.: W2489 ChA 254nm**

|   | Processed Channel Descr. | RT     | Area    | % Area | Height |
|---|--------------------------|--------|---------|--------|--------|
| 1 | W2489 ChA 254nm          | 17.984 | 7076565 | 49.96  | 258360 |
| 2 | W2489 ChA 254nm          | 20.614 | 7087377 | 50.04  | 222833 |

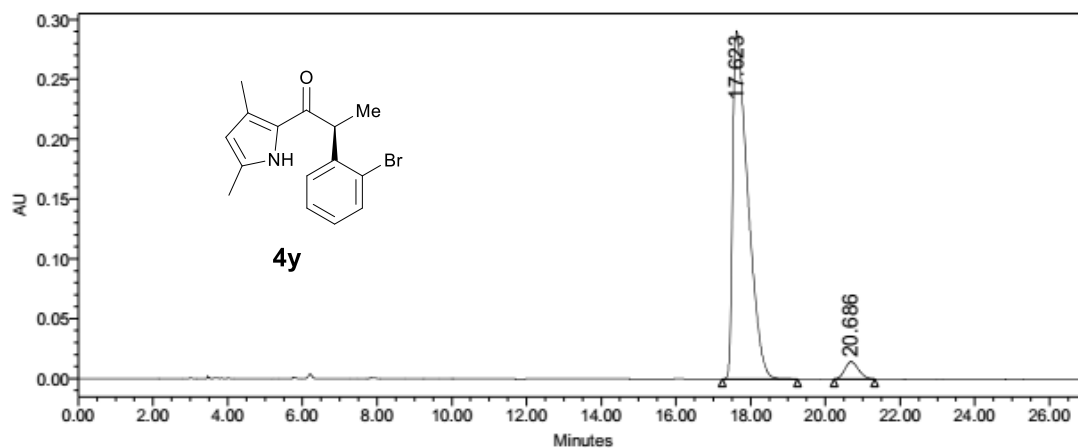

Channel: W2489 ChA; Processed Channel: W2489 ChA 254nm; Result Id: 2861; Processing Method: 9703 OD 3 254

**Processed Channel Descr.: W2489 ChA 254nm**

|   | Processed Channel Descr. | RT     | Area    | % Area | Height |
|---|--------------------------|--------|---------|--------|--------|
| 1 | W2489 ChA 254nm          | 17.623 | 8134182 | 95.71  | 290737 |
| 2 | W2489 ChA 254nm          | 20.686 | 364349  | 4.29   | 14296  |

Daicel Chiralcel OD-3 column, *n*-hexane/2-propanol = 97:3 (v/v), 1.0 mL/min, 254 nm, r.t

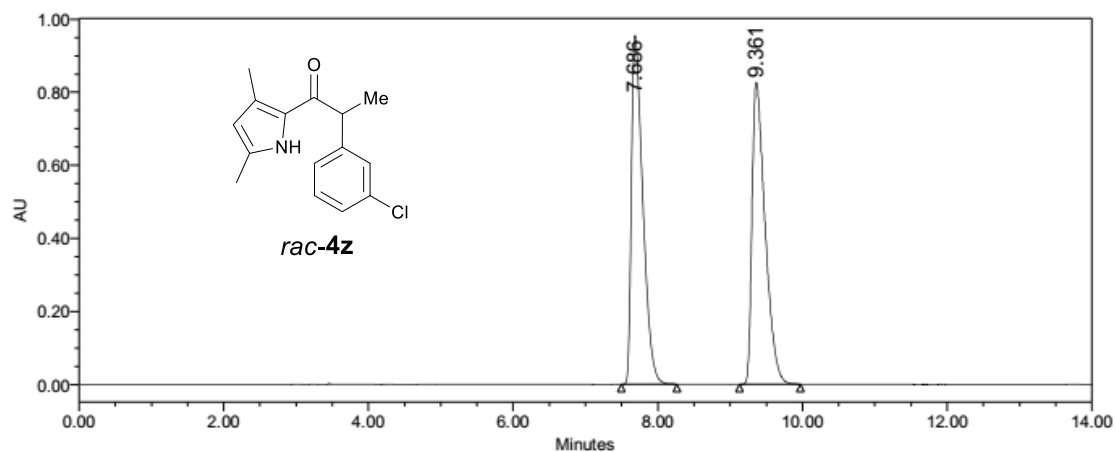

Channel: W2489 ChA; Processed Channel: W2489 ChA 254nm; Result Id: 3056; Processing Method: 9703 OD3 254

**Processed Channel Descr.: W2489 ChA 254nm**

|   | Processed Channel Descr. | RT    | Area     | % Area | Height |
|---|--------------------------|-------|----------|--------|--------|
| 1 | W2489 ChA 254nm          | 7.686 | 10421630 | 50.00  | 954023 |
| 2 | W2489 ChA 254nm          | 9.361 | 10420153 | 50.00  | 827159 |

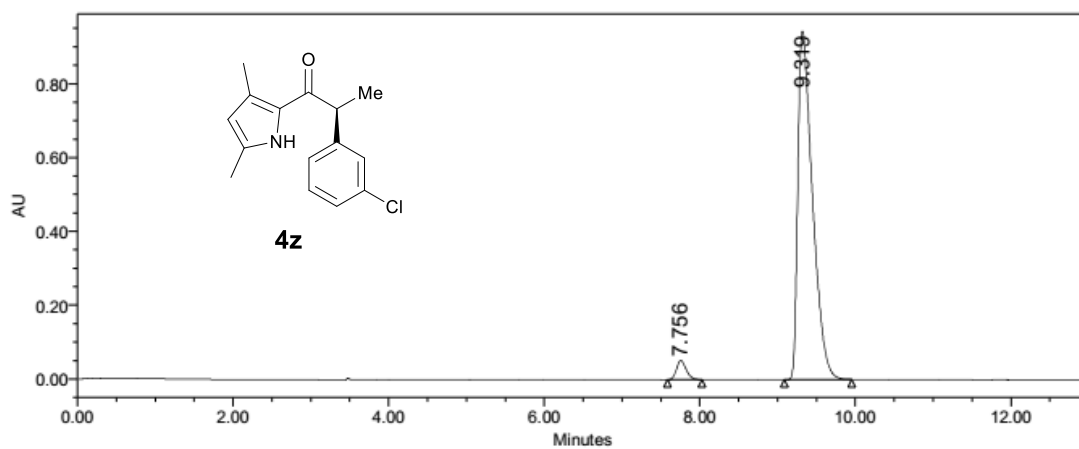

Channel: W2489 ChA; Processed Channel: W2489 ChA 254nm; Result Id: 3046; Processing Method: 9703 OD 3 254

**Processed Channel Descr.: W2489 ChA 254nm**

|   | Processed Channel Descr. | RT    | Area     | % Area | Height |
|---|--------------------------|-------|----------|--------|--------|
| 1 | W2489 ChA 254nm          | 7.756 | 457583   | 3.56   | 52190  |
| 2 | W2489 ChA 254nm          | 9.319 | 12379284 | 96.44  | 944066 |

Daicel Chiralcel OD-3 column, *n*-hexane/2-propanol = 97:3 (v/v), 1.0 mL/min, 254 nm, r.t

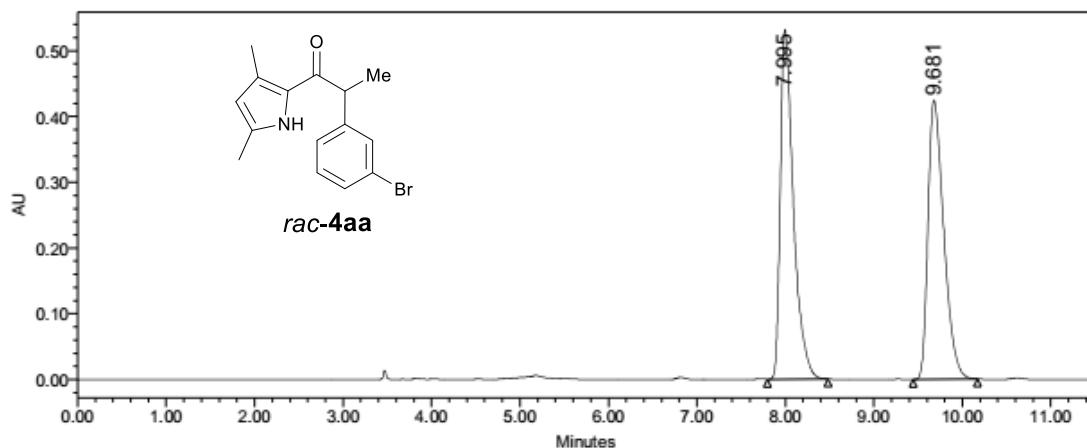

Channel: W2489 ChA; Processed Channel: W2489 ChA 254nm; Result Id: 4873; Processing Method: 9703 OD3 254

**Processed Channel Descr.: W2489 ChA 254nm**

|   | Processed Channel Descr. | RT    | Area    | % Area | Height |
|---|--------------------------|-------|---------|--------|--------|
| 1 | W2489 ChA 254nm          | 7.995 | 5463122 | 50.97  | 531680 |
| 2 | W2489 ChA 254nm          | 9.681 | 5254302 | 49.03  | 424445 |

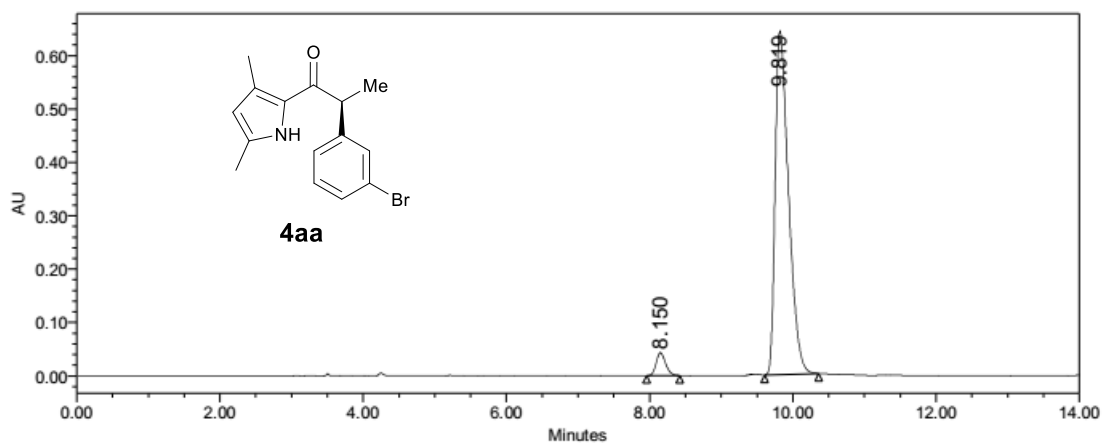

Channel: W2489 ChA; Processed Channel: W2489 ChA 254nm; Result Id: 4681; Processing Method: 9703 OD 3 254

**Processed Channel Descr.: W2489 ChA 254nm**

|   | Processed Channel Descr. | RT    | Area    | % Area | Height |
|---|--------------------------|-------|---------|--------|--------|
| 1 | W2489 ChA 254nm          | 8.150 | 395786  | 4.54   | 43039  |
| 2 | W2489 ChA 254nm          | 9.819 | 8315375 | 95.46  | 643888 |

Daicel Chiralcel OD-3 column, *n*-hexane/2-propanol = 97:3 (v/v), 1.0 mL/min, 254 nm, r.t

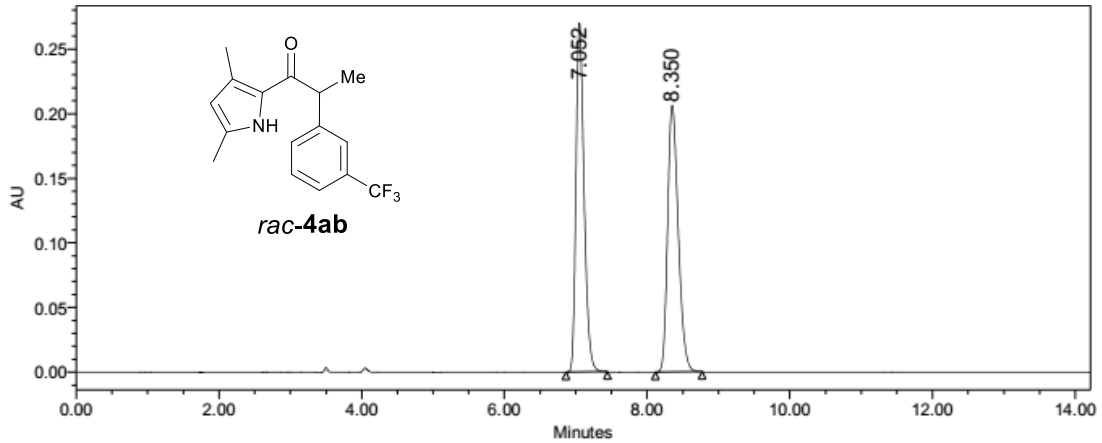

Channel: W2489 ChA; Processed Channel: W2489 ChA 254nm; Result Id: 4991; Processing Method: 9703 OD3 254

**Processed Channel Descr.: W2489 ChA 254nm**

|   | Processed Channel Descr. | RT    | Area    | % Area | Height |
|---|--------------------------|-------|---------|--------|--------|
| 1 | W2489 ChA 254nm          | 7.052 | 2126331 | 49.95  | 270119 |
| 2 | W2489 ChA 254nm          | 8.350 | 2130758 | 50.05  | 206400 |

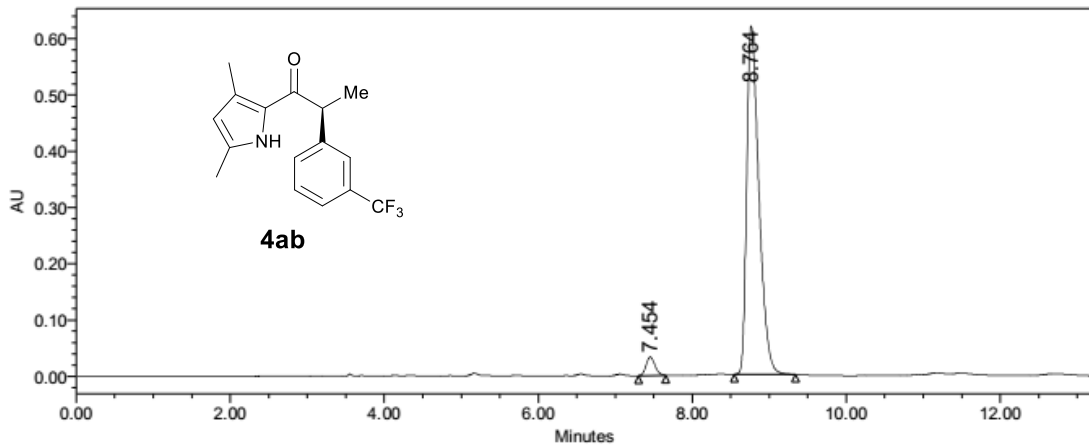

Channel: W2489 ChA; Processed Channel: W2489 ChA 254nm; Result Id: 4960; Processing Method: 9703 OD3 254

**Processed Channel Descr.: W2489 ChA 254nm**

|   | Processed Channel Descr. | RT    | Area    | % Area | Height |
|---|--------------------------|-------|---------|--------|--------|
| 1 | W2489 ChA 254nm          | 7.454 | 264429  | 3.73   | 32857  |
| 2 | W2489 ChA 254nm          | 8.764 | 6816660 | 96.27  | 619111 |

Daicel Chiralcel OD-3 column, *n*-hexane/2-propanol = 97:3 (v/v), 1.0 mL/min, 254 nm, r.t

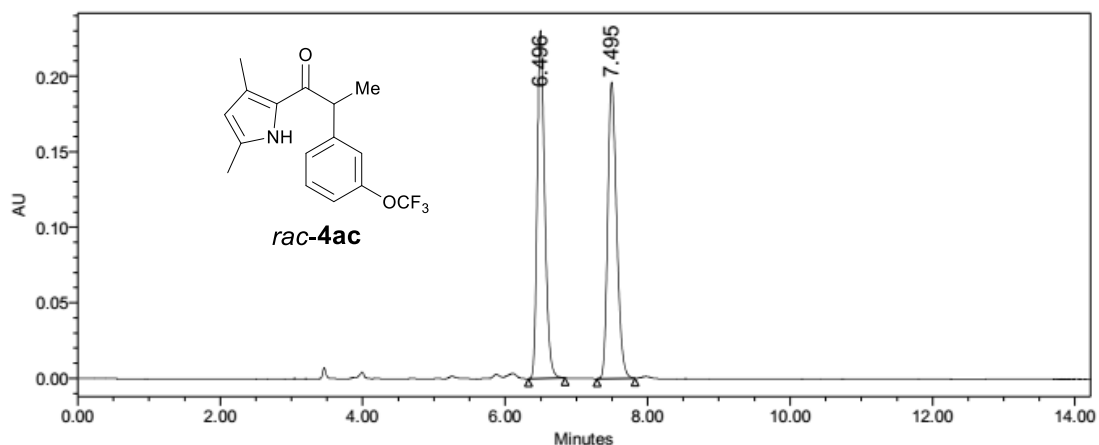

Channel: W2489 ChA; Processed Channel: W2489 ChA 254nm; Result Id: 3940; Processing Method: 9703 OD3 254

**Processed Channel Descr.: W2489 ChA 254nm**

|   | Processed Channel Descr. | RT    | Area    | % Area | Height |
|---|--------------------------|-------|---------|--------|--------|
| 1 | W2489 ChA 254nm          | 6.496 | 1691977 | 49.85  | 230375 |
| 2 | W2489 ChA 254nm          | 7.495 | 1702174 | 50.15  | 196403 |

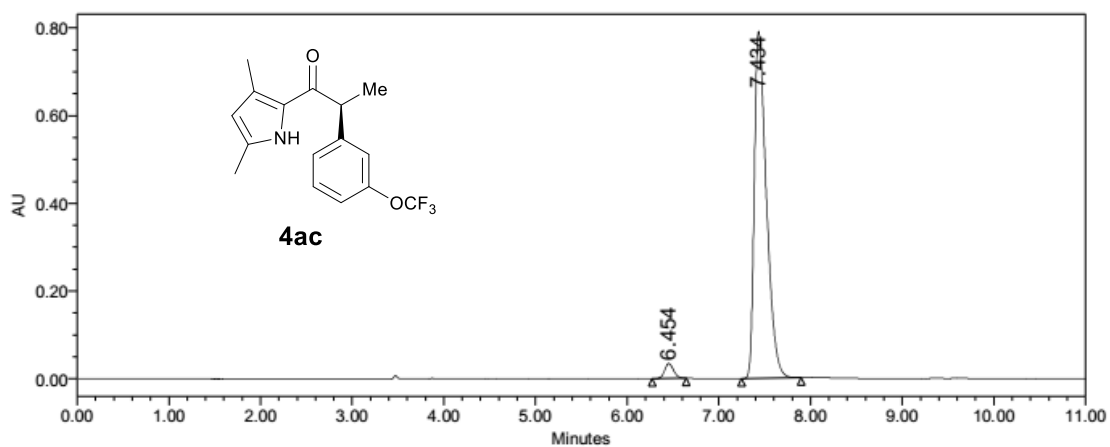

Channel: W2489 ChA; Processed Channel: W2489 ChA 254nm; Result Id: 3807; Processing Method: 9703 OD3 254

**Processed Channel Descr.: W2489 ChA 254nm**

|   | Processed Channel Descr. | RT    | Area    | % Area | Height |
|---|--------------------------|-------|---------|--------|--------|
| 1 | W2489 ChA 254nm          | 6.454 | 230174  | 3.07   | 34152  |
| 2 | W2489 ChA 254nm          | 7.434 | 7256722 | 96.93  | 791134 |

Daicel Chiralcel OD-3 column, *n*-hexane/2-propanol = 97:3 (v/v), 1.0 mL/min, 254 nm, r.t

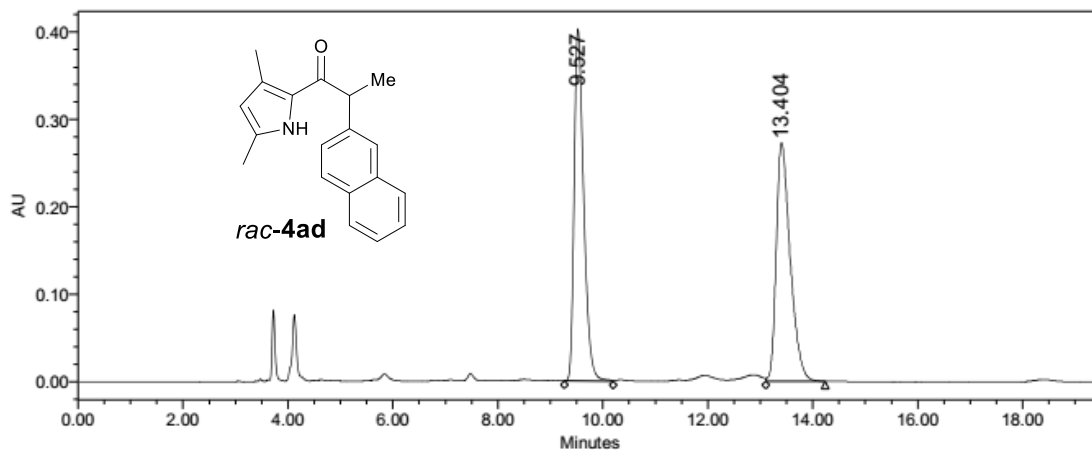

Channel: W2489 ChA; Processed Channel: W2489 ChA 254nm; Result Id: 3048; Processing Method: 9703 OD3 254

**Processed Channel Descr.: W2489 ChA 254nm**

|   | Processed Channel Descr. | RT     | Area    | % Area | Height |
|---|--------------------------|--------|---------|--------|--------|
| 1 | W2489 ChA 254nm          | 9.527  | 5064902 | 50.09  | 402546 |
| 2 | W2489 ChA 254nm          | 13.404 | 5046747 | 49.91  | 272794 |

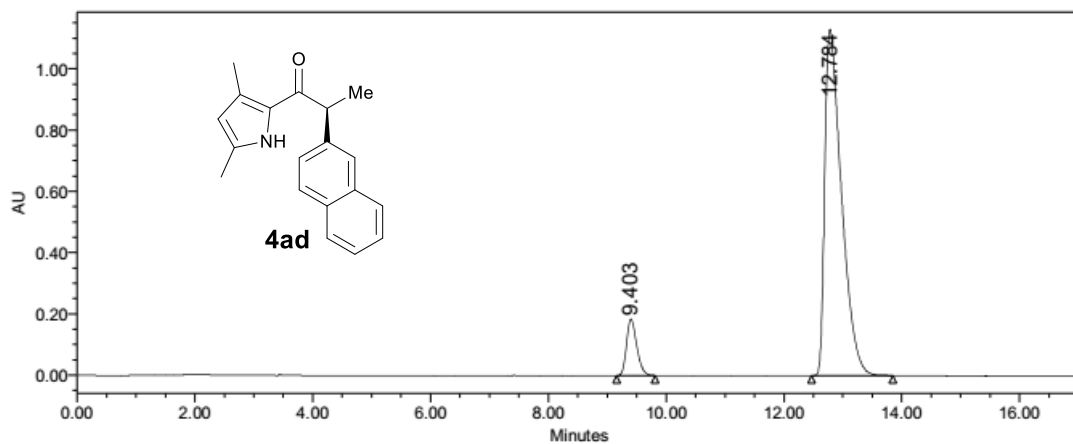

Channel: W2489 ChA; Processed Channel: W2489 ChA 254nm; Result Id: 3052; Processing Method: 9703 OD 3 254

**Processed Channel Descr.: W2489 ChA 254nm**

|   | Processed Channel Descr. | RT     | Area     | % Area | Height  |
|---|--------------------------|--------|----------|--------|---------|
| 1 | W2489 ChA 254nm          | 9.403  | 2228008  | 9.10   | 184025  |
| 2 | W2489 ChA 254nm          | 12.784 | 22254779 | 90.90  | 1130150 |

Daicel Chiralcel OD-3 column, *n*-hexane/2-propanol = 97:3 (v/v), 1.0 mL/min, 254 nm, r.t

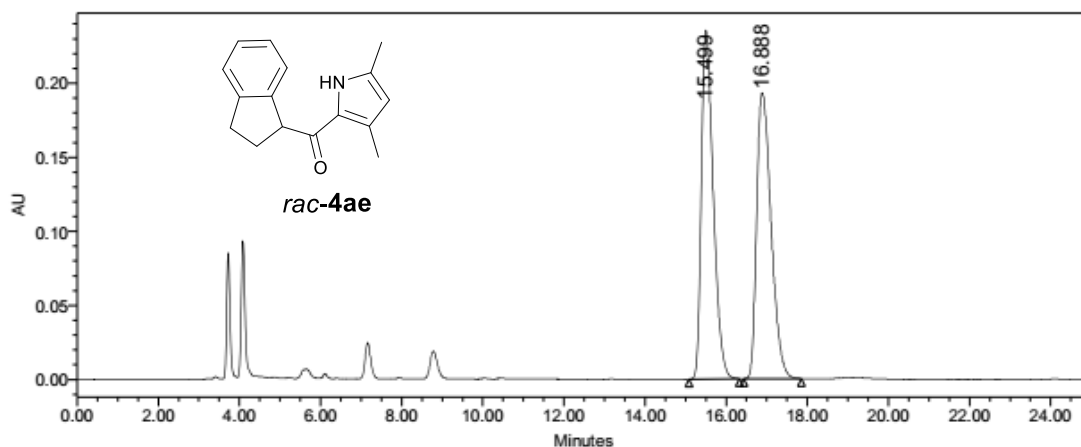

Channel: W2489 ChA; Processed Channel: W2489 ChA 254nm; Result Id: 4853; Processing Method: 9703 OD3 254

**Processed Channel Descr.: W2489 ChA 254nm**

|   | Processed Channel Descr. | RT     | Area    | % Area | Height |
|---|--------------------------|--------|---------|--------|--------|
| 1 | W2489 ChA 254nm          | 15.499 | 4787706 | 50.00  | 235248 |
| 2 | W2489 ChA 254nm          | 16.888 | 4786754 | 50.00  | 193095 |

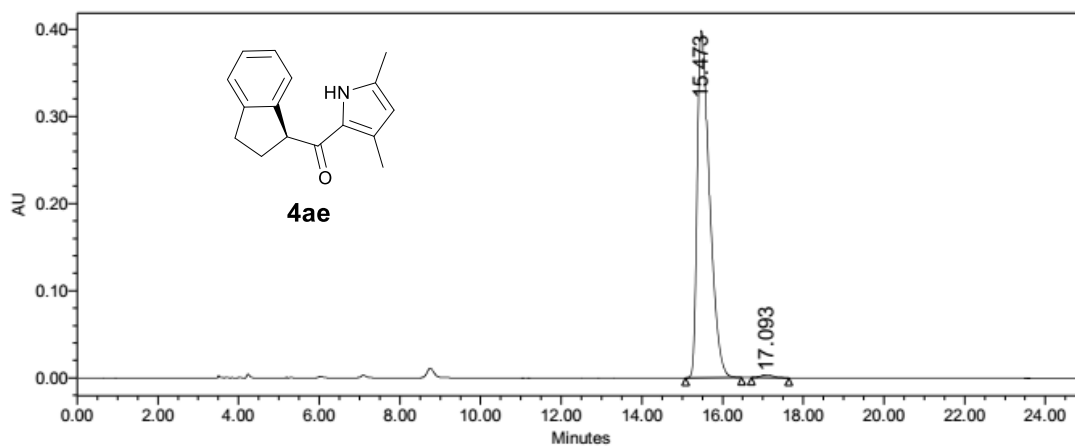

Channel: W2489 ChA; Processed Channel: W2489 ChA 254nm; Result Id: 4857; Processing Method: 9703 OD3 254

**Processed Channel Descr.: W2489 ChA 254nm**

|   | Processed Channel Descr. | RT     | Area    | % Area | Height |
|---|--------------------------|--------|---------|--------|--------|
| 1 | W2489 ChA 254nm          | 15.473 | 8500372 | 99.16  | 398515 |
| 2 | W2489 ChA 254nm          | 17.093 | 72363   | 0.84   | 3449   |
